# Supplementary material for: Sox17 and β-catenin co-occupy Wnt-responsive enhancers to govern the endodermal gene regulatory network
Source: bioRxiv preprint, doi:10.1101/2020.02.19.956565, version 2 (2020-04-21)
Supplement: Supplemental Table2_Sox17_ChIP_peaks [file 956565_file03.xlsx]

## Sheet: Sheet1
Chr	Start	Stop	XetrovID9.0	GeneSymbol9.1
scaffold_244	41902	42210	Xetrov90027473m.g	a2ml1
Chr05	106465344	106465704	Xetrov90014543m.g	aadac
Chr07	77107391	77107827	Xetrov90018659m.g	aadacl3
Chr01	124180411	124180712	Xetrov90002350m.g	prxl2c
Chr10	36699467	36699967	Xetrov90025594m.g	aanat
Chr10	36700994	36701260	Xetrov90025594m.g	aanat
Chr10	31378313	31378577	Xetrov90025380m.g	aar2
Chr02	49970918	49971362	Xetrov90004736m.g	aatf
Chr02	49933514	49933753	Xetrov90004736m.g	aatf
Chr01	107869351	107869597	Xetrov90002107m.g	abca1
Chr04	93563856	93564261	Xetrov90012050m.g	abca4
Chr06	42946911	42947122	Xetrov90016035m.g	abcb5
Chr06	42948868	42949173	Xetrov90016035m.g	abcb5
Chr06	42947694	42947946	Xetrov90016035m.g	abcb5
Chr06	42950346	42950993	Xetrov90016035m.g	abcb5
Chr01	152798105	152798324	Xetrov90003108m.g	abcb9
Chr10	37514889	37515068	Xetrov90025627m.g	abcc3
Chr02	119094086	119094973	Xetrov90006035m.g	abcc4
Chr02	119046302	119046622	Xetrov90006035m.g	abcc4
Chr02	119051482	119052081	Xetrov90006035m.g	abcc4
Chr02	119080897	119081325	Xetrov90006035m.g	abcc4
Chr02	119047184	119048153	Xetrov90006035m.g	abcc4
Chr02	119071630	119072283	Xetrov90006035m.g	abcc4
Chr02	119114890	119115410	Xetrov90006035m.g	abcc4
Chr02	119074437	119074859	Xetrov90006035m.g	abcc4
Chr02	119114475	119114751	Xetrov90006035m.g	abcc4
Chr01	49645092	49645453	Xetrov90000952m.g	abce1
Chr02	38166777	38167255	Xetrov90004502m.g	abhd11
scaffold_124	97617	97896	Xetrov90026021m.g	abo.3
Chr02	24768143	24768507	Xetrov90004236m.g	abr
Chr02	50203112	50203397	Xetrov90004737m.g	acaca
Chr01	138164576	138164847	Xetrov90002780m.g	acacb
Chr01	143375866	143376087	Xetrov90002874m.g	acads
Chr05	97678201	97678530	Xetrov90014400m.g	acap2
Chr05	4408179	4408586	Xetrov90012983m.g	acbd3
Chr01	83022592	83022870	Xetrov90001543m.g	acer1
Chr01	106968166	106968411	Xetrov90002093m.g	acer2
Chr09	54958857	54959243	Xetrov90024096m.g	ackr3
Chr09	54942676	54942891	Xetrov90024096m.g	ackr3
Chr09	54955677	54956181	Xetrov90024096m.g	ackr3
Chr09	54947972	54948293	Xetrov90024096m.g	ackr3
Chr09	54953466	54954084	Xetrov90024096m.g	ackr3
Chr09	79130673	79131120	Xetrov90024556m.g	acmsd
Chr04	87435525	87435805	Xetrov90011942m.g	acot11
Chr01	82933259	82933583	Xetrov90001538m.g	acsbg2
Chr04	61079028	61079251	Xetrov90011454m.g	acsf3
Chr03	43120782	43121228	Xetrov90007875m.g	acss3
Chr07	4489117	4489914	Xetrov90017443m.g	acta2
Chr08	91490419	91490865	Xetrov90021735m.g	actc1
Chr08	91471608	91471994	Xetrov90021735m.g	actc1
Chr08	83348469	83348899	Xetrov90021546m.g	actr10
Chr09	68833271	68833553	Xetrov90024381m.g	acvr1
Chr09	68831584	68832253	Xetrov90024381m.g	acvr1
Chr09	72116775	72117072	Xetrov90024444m.g	acvr2a
Chr06	6214838	6215184	Xetrov90015558m.g	acvr2b
Chr06	6247109	6247499	Xetrov90015558m.g	acvr2b
Chr02	89826071	89826413	Xetrov90005547m.g	acy3
Chr02	89815072	89815792	Xetrov90005547m.g	acy3
Chr02	89846710	89846949	Xetrov90005547m.g	acy3
Chr07	16476461	16477086	Xetrov90017603m.g	adam12
Chr07	16477188	16477489	Xetrov90017603m.g	adam12
Chr07	16504951	16505348	Xetrov90017603m.g	adam12
Chr01	10023788	10024290	Xetrov90000295m.g	adam33
Chr01	10062243	10062670	Xetrov90000295m.g	adam33
Chr01	10058852	10059424	Xetrov90000295m.g	adam33
Chr01	83241321	83241645	Xetrov90001550m.g	adamts10
Chr07	47110465	47110781	Xetrov90018179m.g	adamts15
Chr03	105495468	105495645	Xetrov90008986m.g	adamts17
Chr04	57275331	57275806	Xetrov90011414m.g	adamts18
Chr04	57301831	57302291	Xetrov90011414m.g	adamts18
Chr04	57277222	57277737	Xetrov90011414m.g	adamts18
Chr04	57279937	57280398	Xetrov90011414m.g	adamts18
Chr04	57727499	57727909	Xetrov90011414m.g	adamts18
Chr04	57269144	57269366	Xetrov90011414m.g	adamts18
Chr04	57615215	57615654	Xetrov90011414m.g	adamts18
Chr04	57361005	57361230	Xetrov90011414m.g	adamts18
Chr04	57630706	57631118	Xetrov90011414m.g	adamts18
Chr04	57282010	57282345	Xetrov90011414m.g	adamts18
Chr03	54939381	54939626	Xetrov90008102m.g	adamts20
scaffold_51	705498	705821	Xetrov90029255m.g	adamts3
Chr02	13818944	13819308	Xetrov90004124m.g	adamts5
Chr02	13812956	13813491	Xetrov90004124m.g	adamts5
Chr02	13802444	13802884	Xetrov90004124m.g	adamts5
Chr03	116061332	116061734	Xetrov90009244m.g	adamts7
Chr03	95852547	95852743	Xetrov90008843m.g	adamtsl3
Chr08	106853303	106853707	Xetrov90022160m.g	adamtsl4
Chr04	112279276	112279661	Xetrov90012459m.g	adap1l
Chr04	112281051	112281354	Xetrov90012459m.g	adap1l
Chr09	50569852	50570297	Xetrov90024027m.g	adarb1
Chr08	61902827	61903072	Xetrov90021159m.g	adck1
Chr08	57224626	57224929	Xetrov90020974m.g	coq8b
Chr02	132477803	132478130	Xetrov90006189m.g	adcy6
Chr06	104053000	104053292	Xetrov90016872m.g	adhfe1
Chr05	124010309	124010672	Xetrov90014937m.g	adipoq
Chr01	85481620	85482173	Xetrov90001605m.g	admp
Chr01	85472412	85472762	Xetrov90001605m.g	admp
Chr07	37390403	37390820	Xetrov90017999m.g	admp2
Chr07	37395615	37396097	Xetrov90017999m.g	admp2
Chr07	37403084	37403722	Xetrov90017999m.g	admp2
Chr07	37373711	37373919	Xetrov90017999m.g	admp2
Chr10	27472790	27473113	Xetrov90025258m.g	adnp
Chr06	28893131	28893336	Xetrov90015846m.g	adnp2
Chr06	28891520	28891847	Xetrov90015846m.g	adnp2
Chr07	9579392	9579816	Xetrov90017507m.g	ado
Chr01	144052181	144052461	Xetrov90002910m.g	adora2a
scaffold_52	41805	42045	Xetrov90029297m.g	adra2c
Chr01	139475168	139475344	Xetrov90002806m.g	grk3
Chr06	85041327	85041670	Xetrov90016578m.g	adtrp
Chr03	100181691	100182089	Xetrov90008942m.g	aen
Chr03	100028165	100028732	Xetrov90008942m.g	aen
Chr03	31667725	31667925	Xetrov90007618m.g	afap1l1
Chr03	31681965	31682167	Xetrov90007618m.g	afap1l1
Chr03	31691237	31691553	Xetrov90007618m.g	afap1l1
Chr03	31684130	31684368	Xetrov90007618m.g	afap1l1
Chr08	35953386	35953790	Xetrov90020486m.g	aff2,aff2-like.1
Chr08	36281523	36281927	Xetrov90020488m.g	aff2
Chr08	36180491	36180690	Xetrov90020488m.g	aff2
Chr08	36286714	36287080	Xetrov90020488m.g	aff2
Chr02	108914140	108914510	Xetrov90005869m.g	aff3
Chr02	108826077	108826289	Xetrov90005869m.g	aff3
Chr01	37717704	37717903	Xetrov90000769m.g	aga
Chr01	37728132	37728599	Xetrov90000769m.g	aga
Chr09	54531317	54531607	Xetrov90024088m.g	agap1
Chr06	45187502	45187743	Xetrov90016058m.g	agmo
Chr06	45287934	45288190	Xetrov90016058m.g	agmo
Chr06	45197588	45197753	Xetrov90016058m.g	agmo
Chr06	130407272	130407534	Xetrov90017225m.g	ago2
Chr02	55992382	55992846	Xetrov90004904m.g	ago3
Chr05	114095930	114096160	Xetrov90014707m.g	agpat5
Chr06	44497980	44498284	Xetrov90016047m.g	agr3
Chr07	79363122	79363511	Xetrov90018697m.g	agrn
Chr05	118673207	118673647	Xetrov90014782m.g	agtr1
Chr03	77585801	77586008	Xetrov90008443m.g	ahcyl2
Chr03	77599419	77599874	Xetrov90008443m.g	ahcyl2
Chr04	41458133	41458916	Xetrov90011161m.g	ahnak
Chr04	41470683	41471127	Xetrov90011161m.g	ahnak
Chr06	44452710	44452892	Xetrov90016046m.g	ahr
Chr06	44295767	44296122	Xetrov90016046m.g	ahr
Chr06	44325354	44325640	Xetrov90016046m.g	ahr
Chr07	664190	664855	Xetrov90017353m.g	aicda
Chr07	51164819	51165132	Xetrov90018216m.g	aifm2
Chr05	76332181	76332445	Xetrov90014097m.g	crybg1
Chr05	76355994	76356263	Xetrov90014097m.g	crybg1
scaffold_27	228648	228901	Xetrov90027658m.g	aip
scaffold_27	203832	204089	Xetrov90027658m.g	aip
Chr04	79146241	79146443	Xetrov90011784m.g	ak4
Chr08	7062526	7062884	Xetrov90019896m.g	ak8
Chr01	96332453	96332707	Xetrov90001873m.g	palm2akap2
Chr01	96337469	96337722	Xetrov90001873m.g	palm2akap2
Chr01	96343459	96343887	Xetrov90001873m.g	palm2akap2
Chr01	96337151	96337338	Xetrov90001873m.g	palm2akap2
Chr01	96339856	96340016	Xetrov90001873m.g	palm2akap2
Chr08	93229134	93229377	Xetrov90021760m.g	akap6
Chr05	44946819	44947069	Xetrov90013598m.g	akap7
Chr06	23286876	23287191	Xetrov90015769m.g	akap9
Chr06	23231524	23231690	Xetrov90015769m.g	akap9
Chr05	87025466	87025648	Xetrov90014242m.g	akirin2
Chr04	102085579	102085926	Xetrov90012212m.g	aknad1
scaffold_217	252444	252785	Xetrov90027226m.g	akr7a2
Chr07	103326525	103326955	Xetrov90019219m.g	akt1s1
Chr02	99359479	99359788	Xetrov90005700m.g	alcam
Chr02	99363503	99364324	Xetrov90005700m.g	alcam
Chr03	89678652	89679095	Xetrov90008734m.g	aldh1a2
Chr03	89742477	89742942	Xetrov90008734m.g	aldh1a2
Chr03	89741111	89741511	Xetrov90008734m.g	aldh1a2
Chr03	89662336	89663156	Xetrov90008734m.g	aldh1a2
Chr03	89672369	89672636	Xetrov90008734m.g	aldh1a2
Chr03	89668847	89669376	Xetrov90008734m.g	aldh1a2
Chr03	105659674	105660070	Xetrov90008992m.g	aldh1a3
Chr03	105657123	105657674	Xetrov90008992m.g	aldh1a3
Chr01	102881853	102882052	Xetrov90002035m.g	aldh1b1
Chr04	122789750	122790226	Xetrov90012718m.g	aldh1l1
Chr09	19713869	19714221	Xetrov90023452m.g	aldob
Chr04	91523179	91523737	Xetrov90012027m.g	alg14
Chr04	78471042	78471444	Xetrov90011769m.g	alg6
Chr08	85214638	85215044	Xetrov90021604m.g	ltk
Chr09	10275163	10275522	Xetrov90023139m.g	alkbh5
Chr01	10315328	10315646	Xetrov90000309m.g	alms1
Chr02	151174402	151174646	Xetrov90006700m.g	alox5ap
Chr03	81193430	81193718	Xetrov90008531m.g	alpk3
Chr09	49057903	49058091	Xetrov90023985m.g	als2cr12
Chr04	5077629	5078164	Xetrov90010226m.g	ambra1
Chr02	103205979	103206709	Xetrov90005777m.g	amelx
Chr02	103159564	103159950	Xetrov90005777m.g	amelx
Chr02	103162699	103163250	Xetrov90005777m.g	amelx
Chr08	25346548	25346753	Xetrov90020384m.g	amer1
Chr08	25367839	25368006	Xetrov90020384m.g	amer1
Chr02	144116406	144116798	Xetrov90006516m.g	amhr2
Chr08	30181340	30181655	Xetrov90020436m.g	ammecr1
Chr08	77027421	77027855	Xetrov90021407m.g	amn
Chr08	31068944	31069194	Xetrov90020454m.g	amot
Chr08	31066714	31066891	Xetrov90020454m.g	amot
Chr05	126761050	126761832	Xetrov90015030m.g	amotl2
Chr05	126747608	126748254	Xetrov90015030m.g	amotl2
Chr05	126742847	126743881	Xetrov90015030m.g	amotl2
Chr05	126738799	126738984	Xetrov90015030m.g	amotl2
Chr05	126728208	126728455	Xetrov90015030m.g	amotl2
Chr05	126726541	126727190	Xetrov90015030m.g	amotl2
Chr05	126732050	126732271	Xetrov90015030m.g	amotl2
Chr02	67056353	67056815	Xetrov90005137m.g	ampd1
Chr06	80603058	80603315	Xetrov90016484m.g	amph
Chr04	99759410	99759807	Xetrov90012182m.g	amy2a
Chr04	99986205	99986472	Xetrov90012182m.g	amy2a
Chr04	99819361	99819709	Xetrov90012182m.g	amy2a
Chr04	99827329	99827638	Xetrov90012182m.g	amy2a
Chr01	49662571	49662963	Xetrov90000950m.g	anapc10
Chr01	49661120	49662061	Xetrov90000950m.g	anapc10
Chr06	116897913	116898257	Xetrov90017084m.g	angpt1
Chr09	39329971	39330483	Xetrov90023816m.g	ankar
Chr07	72715566	72715753	Xetrov90018564m.g	ankk1
Chr07	72785552	72785842	Xetrov90018564m.g	ankk1
Chr02	113486598	113486801	Xetrov90005956m.g	ankrd10
Chr07	4524504	4524836	Xetrov90017446m.g	ankrd22
Chr01	172225816	172226120	Xetrov90003464m.g	slf1
Chr01	172221638	172221989	Xetrov90003464m.g	slf1
Chr08	116877094	116877580	Xetrov90022468m.g	ankrd35
Chr01	55871816	55872154	Xetrov90001027m.g	ankrd50
Chr07	70142033	70142623	Xetrov90018530m.g	ankrd65
Chr06	81257246	81257603	Xetrov90016493m.g	anln
Chr06	81253626	81253893	Xetrov90016493m.g	anln
scaffold_203	381032	381361	Xetrov90027051m.g	ano5
scaffold_203	367523	368017	Xetrov90027051m.g	ano5
Chr03	98687277	98687671	Xetrov90008907m.g	anpep
Chr01	118551210	118551545	Xetrov90002274m.g	anxa1.2
Chr07	41759133	41759472	Xetrov90018066m.g	anxa11
Chr03	83834941	83835424	Xetrov90008604m.g	anxa2
Chr03	111809988	111810323	Xetrov90009171m.g	anxa4
Chr07	31288397	31288628	Xetrov90017881m.g	anxa7
Chr07	109984889	109985105	Xetrov90019402m.g	ap2a1
Chr01	163322779	163323052	Xetrov90003314m.g	ap3s1
Chr08	92984858	92985085	Xetrov90021751m.g	ap4s1
Chr08	83628332	83628540	Xetrov90021555m.g	ap5m1
Chr08	83626503	83626719	Xetrov90021555m.g	ap5m1
Chr07	38373238	38373599	Xetrov90018018m.g	ap5s1
Chr01	117328569	117328750	Xetrov90002255m.g	apba1
Chr03	87522788	87522976	Xetrov90008696m.g	apba2
Chr01	27605299	27605585	Xetrov90000610m.g	apbb2
Chr01	27609837	27610024	Xetrov90000610m.g	apbb2
Chr06	89692940	89693140	Xetrov90016641m.g	apcdd1
Chr07	38864680	38864963	Xetrov90018030m.g	cenps
Chr08	31223299	31223544	Xetrov90020458m.g	apln
Chr08	31219209	31219626	Xetrov90020458m.g	apln
Chr08	31262093	31262316	Xetrov90020458m.g	apln
Chr08	31285180	31285431	Xetrov90020458m.g	apln
Chr08	31210446	31211012	Xetrov90020458m.g	apln
Chr01	131404458	131404832	Xetrov90002641m.g	aplnr
Chr01	131401999	131402323	Xetrov90002641m.g	aplnr
Chr01	131390778	131391023	Xetrov90002641m.g	aplnr
Chr01	131400560	131400932	Xetrov90002641m.g	aplnr
Chr01	131381368	131381748	Xetrov90002641m.g	aplnr
Chr01	131386867	131387253	Xetrov90002641m.g	aplnr
Chr07	101429476	101429925	Xetrov90019159m.g	apoc1
Chr07	101431765	101432610	Xetrov90019159m.g	apoc1
Chr02	88914852	88915244	Xetrov90005520m.g	appbp2
Chr02	88913706	88913901	Xetrov90005520m.g	appbp2
Chr02	167353567	167353988	Xetrov90006968m.g	aqp11
Chr06	94640113	94640376	Xetrov90016707m.g	aqp4
Chr08	91420732	91420974	Xetrov90021732m.g	aqr
Chr01	24565768	24566364	Xetrov90000560m.g	arap2
Chr01	24535077	24535286	Xetrov90000560m.g	arap2
Chr03	19276567	19276956	Xetrov90007465m.g	arap3
Chr08	73594601	73594852	Xetrov90021335m.g	arf6.2
Chr02	114788080	114788748	Xetrov90005972m.g	arglu1
Chr02	114817264	114817924	Xetrov90005972m.g	arglu1
Chr02	114814442	114814854	Xetrov90005972m.g	arglu1
Chr02	114946650	114946882	Xetrov90005972m.g	arglu1
Chr02	114898111	114898448	Xetrov90005972m.g	arglu1
Chr02	114783284	114783547	Xetrov90005972m.g	arglu1
Chr02	114810090	114810411	Xetrov90005972m.g	arglu1
Chr08	90419878	90420194	Xetrov90021722m.g	arhgap11a.1
Chr08	90416086	90416364	Xetrov90021722m.g	arhgap11a.1
Chr06	14820195	14820431	Xetrov90015640m.g	arhgap12
Chr09	14152929	14153357	Xetrov90023263m.g	arhgap17
Chr09	14168341	14168644	Xetrov90023263m.g	arhgap17
Chr09	14154310	14154738	Xetrov90023263m.g	arhgap17
Chr06	17498008	17498202	Xetrov90015682m.g	arhgap21
Chr07	36775927	36776253	Xetrov90017984m.g	arhgap22
Chr01	93360411	93360701	Xetrov90001810m.g	arhgap24
Chr01	93231865	93232227	Xetrov90001810m.g	arhgap24
Chr04	93465049	93465238	Xetrov90012049m.g	arhgap29
Chr07	67036739	67037447	Xetrov90018447m.g	arhgap32
Chr08	14200035	14200331	Xetrov90020067m.g	arhgap4
Chr05	105660885	105661195	Xetrov90014528m.g	arhgef26
Chr01	166280779	166281062	Xetrov90003375m.g	arhgef28
Chr01	166351731	166352102	Xetrov90003375m.g	arhgef28
scaffold_49	70846	71246	Xetrov90029070m.g	arhgef3.2
scaffold_49	72658	73073	Xetrov90029070m.g	arhgef3.2
scaffold_49	86821	87337	Xetrov90029070m.g	arhgef3.2
Chr01	63132753	63133288	Xetrov90001160m.g	arhgef38
Chr01	63104717	63105003	Xetrov90001160m.g	arhgef38
Chr08	48085537	48085804	Xetrov90020669m.g	arhgef6
Chr02	51908930	51909293	Xetrov90004792m.g	arid1a
Chr05	41564417	41564785	Xetrov90013540m.g	arid1b
Chr05	41433914	41434303	Xetrov90013540m.g	arid1b
Chr03	54427742	54428115	Xetrov90008093m.g	arid2
Chr03	54369795	54370163	Xetrov90008093m.g	arid2
Chr03	54432159	54432464	Xetrov90008093m.g	arid2
Chr03	54417833	54418054	Xetrov90008093m.g	arid2
Chr03	54417427	54417603	Xetrov90008093m.g	arid2
Chr03	84785797	84786012	Xetrov90008626m.g	arid3b
Chr03	84796101	84796432	Xetrov90008626m.g	arid3b
Chr03	84789595	84789974	Xetrov90008626m.g	arid3b
Chr03	84776649	84776837	Xetrov90008626m.g	arid3b
Chr02	17668174	17668383	Xetrov90004155m.g	arl13b
Chr01	163247857	163248104	Xetrov90003312m.g	arl14epl
Chr03	36034297	36034578	Xetrov90007697m.g	arl3l2
Chr06	46039874	46040234	Xetrov90016064m.g	arl4a
Chr06	46009940	46010287	Xetrov90016064m.g	arl4a
Chr06	46003324	46003635	Xetrov90016064m.g	arl4a
Chr06	45877106	45877261	Xetrov90016064m.g	arl4a
Chr06	45943775	45944355	Xetrov90016064m.g	arl4a
Chr06	46015368	46015688	Xetrov90016064m.g	arl4a
Chr06	46001167	46001400	Xetrov90016064m.g	arl4a
Chr06	45954353	45954685	Xetrov90016064m.g	arl4a
Chr06	46038631	46038992	Xetrov90016064m.g	arl4a
Chr06	45931081	45931405	Xetrov90016064m.g	arl4a
Chr06	46016308	46016660	Xetrov90016064m.g	arl4a
Chr09	54258143	54258565	Xetrov90024084m.g	arl4c
Chr09	54272537	54273192	Xetrov90024084m.g	arl4c
Chr09	54271461	54271658	Xetrov90024084m.g	arl4c
Chr09	54282853	54283171	Xetrov90024084m.g	arl4c
Chr09	54250260	54250559	Xetrov90024084m.g	arl4c
Chr09	54286174	54286583	Xetrov90024084m.g	arl4c
Chr09	54260755	54261065	Xetrov90024084m.g	arl4c
Chr09	54301157	54301465	Xetrov90024084m.g	arl4c
Chr10	3544300	3544579	Xetrov90024707m.g	arl5c
Chr10	3546710	3547099	Xetrov90024707m.g	arl5c
Chr10	3537799	3538173	Xetrov90024707m.g	arl5c
Chr10	3536426	3536789	Xetrov90024707m.g	arl5c
Chr01	152751826	152752069	Xetrov90003103m.g	arl6ip4
Chr06	103647434	103647640	Xetrov90016861m.g	armc1
Chr06	18266211	18266579	Xetrov90015694m.g	armc3
Chr10	35786439	35786635	Xetrov90025529m.g	armc7
Chr09	32862795	32863061	Xetrov90023709m.g	arpc1b
Chr03	98604561	98604840	Xetrov90008903m.g	arpin
Chr08	22698753	22699115	Xetrov90020289m.g	arr3
Chr01	171094643	171094987	Xetrov90003456m.g	arrdc3
scaffold_174	350424	350647	Xetrov90026758m.g	art5
Chr01	146594720	146594945	Xetrov90003019m.g	arvcf
Chr01	146539926	146540089	Xetrov90003019m.g	arvcf
Chr02	36386064	36386293	Xetrov90004449m.g	arx
Chr02	36443993	36444210	Xetrov90004449m.g	arx
Chr02	36403601	36404035	Xetrov90004449m.g	arx
Chr02	36386790	36387115	Xetrov90004449m.g	arx
Chr02	36196739	36196947	Xetrov90004449m.g	arx
Chr02	36380369	36380643	Xetrov90004449m.g	arx
scaffold_73	334838	335178	Xetrov90030188m.g	asb4
Chr07	35128747	35129148	Xetrov90017949m.g	ascc1
Chr07	35112804	35113457	Xetrov90017949m.g	ascc1
Chr07	35116249	35116633	Xetrov90017949m.g	ascc1
Chr03	40207171	40207439	Xetrov90007817m.g	ascl1
Chr03	40167096	40167365	Xetrov90007817m.g	ascl1
scaffold_1242	4864	5061	Xetrov90026056m.g	ash1l
Chr03	121808902	121809273	Xetrov90009496m.g	ash2l
Chr10	8378458	8378707	Xetrov90024847m.g	asic2
Chr10	8438305	8438757	Xetrov90024847m.g	asic2
Chr10	8463744	8464114	Xetrov90024847m.g	asic2
Chr09	77966469	77966856	Xetrov90024515m.g	asic4
Chr02	34538360	34538642	Xetrov90004434m.g	asmt
Chr02	34527538	34527965	Xetrov90004434m.g	asmt
Chr08	5577067	5577278	Xetrov90019856m.g	ass1
Chr08	5584761	5585056	Xetrov90019856m.g	ass1
Chr04	88820466	88821048	Xetrov90011970m.g	astn1
Chr06	97510989	97511365	Xetrov90016768m.g	asxl3
Chr07	10842690	10842925	Xetrov90017543m.g	ate1
Chr04	110681419	110681742	Xetrov90012414m.g	atf4
Chr04	110688825	110689122	Xetrov90012414m.g	atf4
Chr07	95482258	95482623	Xetrov90018987m.g	atf5
Chr04	108471829	108472064	Xetrov90012341m.g	atf6
Chr04	104646338	104646765	Xetrov90012259m.g	atf7ip
Chr05	123283432	123283811	Xetrov90014907m.g	atg16l1
Chr04	78232210	78232439	Xetrov90011767m.g	atg4c
Chr04	78281521	78281886	Xetrov90011767m.g	atg4c
Chr04	78292024	78292239	Xetrov90011767m.g	atg4c
Chr01	67607589	67607792	Xetrov90001222m.g	atoh1
scaffold_633	32263	33817	Xetrov90029850m.g	atp1a1
scaffold_633	4383	5193	Xetrov90029850m.g	atp1a1
Chr02	68529734	68530208	Xetrov90005165m.g	atp1b1
Chr02	68506488	68506937	Xetrov90005165m.g	atp1b1
Chr05	125954045	125954410	Xetrov90015003m.g	atp1b3
Chr05	125978913	125979347	Xetrov90015003m.g	atp1b3
Chr05	125985104	125985452	Xetrov90015003m.g	atp1b3
Chr04	114042760	114043076	Xetrov90012511m.g	atp2b4
Chr08	3657666	3657967	Xetrov90019789m.g	atp2b3
Chr08	3586016	3586341	Xetrov90019789m.g	atp2b3
Chr08	3588987	3589317	Xetrov90019789m.g	atp2b3
Chr08	3661339	3661617	Xetrov90019789m.g	atp2b3
Chr02	10105218	10105398	Xetrov90004059m.g	atp5po
Chr08	71917017	71917582	Xetrov90021311m.g	dmac2l
Chr01	168255980	168256225	Xetrov90003425m.g	atp6ap1l
Chr01	168278589	168279176	Xetrov90003425m.g	atp6ap1l
scaffold_113	531361	531572	Xetrov90025919m.g	atp6v0a1
scaffold_113	563697	563996	Xetrov90025919m.g	atp6v0a1
scaffold_113	560797	561095	Xetrov90025919m.g	atp6v0a1
scaffold_113	571877	572271	Xetrov90025919m.g	atp6v0a1
scaffold_113	562651	562992	Xetrov90025919m.g	atp6v0a1
scaffold_113	556885	557497	Xetrov90025919m.g	atp6v0a1
Chr04	82164321	82164610	Xetrov90011838m.g	atp6v0b
Chr04	82189538	82189822	Xetrov90011838m.g	atp6v0b
Chr03	34021997	34022202	Xetrov90007651m.g	atp6v0e1
Chr03	34017180	34017433	Xetrov90007651m.g	atp6v0e1
Chr06	118545302	118545649	Xetrov90017102m.g	atp6v1c1
Chr06	118600590	118600798	Xetrov90017102m.g	atp6v1c1
Chr08	98714478	98714751	Xetrov90021878m.g	atp6v1d
Chr01	188746390	188746658	Xetrov90003729m.g	atp8b1
Chr02	57065778	57066107	Xetrov90004928m.g	atp5if1
Chr01	7523229	7523410	Xetrov90000242m.g	atrn
Chr01	154469211	154469782	Xetrov90003171m.g	atxn2
Chr01	126441307	126441671	Xetrov90002383m.g	auh
Chr01	126447325	126447658	Xetrov90002383m.g	auh
Chr02	95741280	95741518	Xetrov90005647m.g	auts2
Chr01	6328177	6328623	Xetrov90000232m.g	avp
Chr01	6332443	6332703	Xetrov90000232m.g	avp
Chr02	65427546	65427838	Xetrov90005099m.g	avpr1b
Chr08	12451438	12451735	Xetrov90020052m.g	avpr2
scaffold_715	24796	25318	Xetrov90030148m.g	axin2
scaffold_715	1897	2142	Xetrov90030147m.g	cep112
Chr08	57955747	57956226	Xetrov90021000m.g	axl
Chr08	57963841	57964238	Xetrov90021000m.g	axl
Chr08	57980058	57980301	Xetrov90021000m.g	axl
Chr06	75552992	75553348	Xetrov90016433m.g	azi2
Chr06	75631034	75631259	Xetrov90016433m.g	azi2
Chr06	118605818	118606048	Xetrov90017104m.g	azin1
Chr06	118649412	118649604	Xetrov90017104m.g	azin1
Chr06	118650037	118650332	Xetrov90017104m.g	azin1
Chr02	86282503	86282729	Xetrov90005467m.g	azin2
Chr09	64440142	64440453	Xetrov90024322m.g	b3galt1
Chr02	150993468	150993637	Xetrov90006690m.g	b3glct
Chr04	41649283	41649574	Xetrov90011172m.g	b3gat3
Chr05	28110880	28111243	Xetrov90013333m.g	b3gnt2
Chr05	28114279	28114570	Xetrov90013333m.g	b3gnt2
Chr05	28118143	28118404	Xetrov90013333m.g	b3gnt2
Chr05	28050945	28051380	Xetrov90013333m.g	b3gnt2
scaffold_103	405771	406005	Xetrov90025742m.g	b3gntl1
Chr02	2199355	2199816	Xetrov90003901m.g	b4galt3l1
Chr02	2197301	2197581	Xetrov90003901m.g	b4galt3l1
Chr06	96839609	96839926	Xetrov90016751m.g	b4galt6
Chr02	12348832	12349137	Xetrov90004109m.g	bach1
Chr05	83533403	83533770	Xetrov90014210m.g	bach2
Chr05	83526588	83526882	Xetrov90014210m.g	bach2
Chr05	49267968	49268446	Xetrov90013652m.g	baf-l
Chr05	90401314	90401773	Xetrov90014303m.g	adgrb3
Chr05	90499703	90499898	Xetrov90014303m.g	adgrb3
Chr10	18770204	18770518	Xetrov90025104m.g	baiap2
Chr09	20230155	20230362	Xetrov90023481m.g	baiap2l1
Chr09	20220103	20220641	Xetrov90023481m.g	baiap2l1
Chr09	20267248	20267688	Xetrov90023481m.g	baiap2l1
Chr09	20259098	20259392	Xetrov90023481m.g	baiap2l1
Chr09	20282585	20282796	Xetrov90023481m.g	baiap2l1
Chr06	15901860	15902667	Xetrov90015649m.g	bambi
Chr06	15861307	15861568	Xetrov90015649m.g	bambi
Chr06	15885499	15885885	Xetrov90015649m.g	bambi
Chr06	15883467	15883811	Xetrov90015649m.g	bambi
Chr06	15910464	15910775	Xetrov90015649m.g	bambi
Chr06	15887992	15888441	Xetrov90015649m.g	bambi
Chr04	68461904	68462306	Xetrov90011596m.g	banp
Chr08	6889772	6890148	Xetrov90019891m.g	barhl1
Chr04	95092747	95093042	Xetrov90012085m.g	barhl2
Chr06	58804140	58804359	Xetrov90016209m.g	basp1
Chr06	25936189	25936771	Xetrov90015808m.g	bbs9
Chr07	53224523	53224999	Xetrov90018249m.g	bc014685
Chr07	53251699	53251962	Xetrov90018249m.g	bc014685
Chr07	53253405	53253623	Xetrov90018249m.g	bc014685
Chr07	101230180	101230373	Xetrov90019153m.g	bcam
Chr07	101299244	101299760	Xetrov90019153m.g	bcam
Chr10	26282039	26282355	Xetrov90025244m.g	bcas1
Chr05	27194776	27195068	Xetrov90013319m.g	bcl11a
Chr05	27278221	27278416	Xetrov90013319m.g	bcl11a
Chr05	27309120	27309435	Xetrov90013319m.g	bcl11a
Chr05	27427948	27428180	Xetrov90013319m.g	bcl11a
Chr06	52581474	52581692	Xetrov90016174m.g	bcl2
Chr05	50452781	50453024	Xetrov90013669m.g	bcl2l11
Chr05	50525185	50525831	Xetrov90013669m.g	bcl2l11
Chr05	50433913	50434233	Xetrov90013669m.g	bcl2l11
Chr02	70591415	70591656	Xetrov90005205m.g	bcor
Chr02	70637278	70637654	Xetrov90005205m.g	bcor
Chr02	70677619	70677875	Xetrov90005205m.g	bcor
Chr01	143944234	143944599	Xetrov90002905m.g	bcr
Chr05	97736427	97736630	Xetrov90014403m.g	bdh1
Chr05	97735214	97735453	Xetrov90014403m.g	bdh1
Chr05	76131523	76131918	Xetrov90014089m.g	bend3
Chr05	76073139	76073500	Xetrov90014089m.g	bend3
Chr04	84960504	84960879	Xetrov90011881m.g	bend5
Chr06	103326871	103327109	Xetrov90016858m.g	bhlhe22
Chr06	103334709	103335031	Xetrov90016858m.g	bhlhe22
scaffold_400	116131	116491	Xetrov90028589m.g	bicd1
Chr03	119697792	119698033	Xetrov90009393m.g	bin3
Chr02	159023011	159023732	Xetrov90006849m.g	birc2
Chr03	115833402	115833812	Xetrov90009226m.g	blm
Chr05	21294914	21295321	Xetrov90013240m.g	bmp2
Chr05	21302607	21302896	Xetrov90013240m.g	bmp2
Chr05	21338681	21338976	Xetrov90013240m.g	bmp2
Chr05	21300601	21301094	Xetrov90013240m.g	bmp2
Chr05	21448011	21448294	Xetrov90013240m.g	bmp2
Chr01	76904947	76905202	Xetrov90001376m.g	bmp3
Chr01	76904063	76904422	Xetrov90001376m.g	bmp3
Chr08	74091262	74091590	Xetrov90021344m.g	bmp4
Chr08	74114508	74114815	Xetrov90021344m.g	bmp4
Chr08	74094311	74094763	Xetrov90021344m.g	bmp4
Chr08	74115209	74115715	Xetrov90021344m.g	bmp4
Chr08	74183532	74183740	Xetrov90021344m.g	bmp4
scaffold_276	81869	82250	Xetrov90027723m.g	bmp7.1
Chr03	88794556	88794824	Xetrov90008709m.g	bmp7.2
Chr06	25640067	25640500	Xetrov90015805m.g	bmper
Chr06	25632000	25632327	Xetrov90015805m.g	bmper
Chr07	45676465	45677042	Xetrov90018159m.g	bmpr1a
Chr07	45671643	45671890	Xetrov90018159m.g	bmpr1a
Chr01	66782751	66783135	Xetrov90001215m.g	bmpr1b
Chr01	66778806	66779197	Xetrov90001215m.g	bmpr1b
Chr09	46818934	46819112	Xetrov90023952m.g	bmpr2
Chr01	105679074	105679355	Xetrov90002079m.g	bnc2
scaffold_448	5203	5398	Xetrov90028855m.g	bod1
Chr01	154432535	154432721	Xetrov90003169m.g	brap
Chr05	1853950	1854232	Xetrov90012926m.g	babam2
Chr09	20196832	20197110	Xetrov90023480m.g	bri3
Chr09	20198483	20198787	Xetrov90023480m.g	bri3
Chr09	20204566	20204897	Xetrov90023480m.g	bri3
Chr08	88014313	88014611	Xetrov90021670m.g	brms1l
Chr08	47822294	47822767	Xetrov90020662m.g	brs3
Chr08	43027595	43027757	Xetrov90020569m.g	brwd3
Chr01	86566664	86566938	Xetrov90001678m.g	bsg
Chr08	80471707	80472023	Xetrov90021489m.g	btbd6
Chr08	80458302	80458545	Xetrov90021489m.g	btbd6
Chr08	80442782	80443179	Xetrov90021489m.g	btbd6
Chr08	80477734	80478129	Xetrov90021489m.g	btbd6
Chr08	80402537	80402855	Xetrov90021489m.g	btbd6
Chr03	46254011	46254358	Xetrov90007925m.g	btg1
Chr03	46310577	46310847	Xetrov90007925m.g	btg1
Chr03	46308514	46308671	Xetrov90007925m.g	btg1
Chr02	62217829	62218023	Xetrov90005010m.g	btg2
Chr07	75083734	75083982	Xetrov90018618m.g	btg4
Chr08	17058519	17058809	Xetrov90020155m.g	btk
Chr08	17052247	17052615	Xetrov90020155m.g	btk
Chr07	22238681	22239025	Xetrov90017712m.g	btrc
Chr07	51787667	51787879	Xetrov90018221m.g	fam241b
Chr07	51746400	51746621	Xetrov90018221m.g	fam241b
Chr07	51755195	51755489	Xetrov90018221m.g	fam241b
Chr07	51807431	51807656	Xetrov90018221m.g	fam241b
Chr07	51810569	51810866	Xetrov90018221m.g	fam241b
Chr02	168867353	168867623	Xetrov90006993m.g	emsy
Chr04	160490	161018	Xetrov90010134m.g	c11orf49
Chr04	159391	159914	Xetrov90010134m.g	c11orf49
Chr02	165524159	165524422	Xetrov90006938m.g	hikeshi
Chr01	156035051	156035328	Xetrov90003196m.g	c12orf49
Chr09	18953903	18954232	Xetrov90023425m.g	mosmo
Chr09	34728760	34729095	Xetrov90023745m.g	c16orf72
Chr06	35941715	35941996	Xetrov90015958m.g	c18orf21
Chr06	35893540	35893692	Xetrov90015958m.g	c18orf21
Chr06	35930904	35931488	Xetrov90015958m.g	c18orf21
Chr06	35961919	35962253	Xetrov90015958m.g	c18orf21
Chr04	21045651	21045917	Xetrov90010670m.g	faap24
Chr08	56807728	56808003	Xetrov90020961m.g	c19orf47
Chr08	56805431	56805646	Xetrov90020961m.g	c19orf47
Chr08	24942320	24942675	Xetrov90020369m.g	c1galt1c1
Chr08	24942058	24942218	Xetrov90020369m.g	c1galt1c1
Chr07	79045657	79045952	Xetrov90018694m.g	c1orf159
Chr04	109348084	109348442	Xetrov90012370m.g	odr4
Chr02	133474508	133474790	Xetrov90006215m.g	c1ql4
Chr09	11818680	11819236	Xetrov90023192m.g	c1qtnf1
Chr01	186203595	186204023	Xetrov90003683m.g	c1qtnf3
Chr01	186193814	186194298	Xetrov90003683m.g	c1qtnf3
Chr08	53860700	53860975	Xetrov90020872m.g	c2
Chr08	53875154	53875523	Xetrov90020872m.g	c2
Chr02	11111440	11111740	Xetrov90004085m.g	cfap298
Chr02	11100577	11100892	Xetrov90004085m.g	cfap298
Chr07	85717920	85718182	Xetrov90018825m.g	c2cd2l
Chr05	19758122	19758343	Xetrov90013202m.g	c2orf73
Chr05	97556325	97556619	Xetrov90014398m.g	xxylt1
Chr05	97571325	97571539	Xetrov90014398m.g	xxylt1
Chr05	117082234	117082574	Xetrov90014774m.g	dipk2a
Chr05	117119115	117119321	Xetrov90014774m.g	dipk2a
Chr01	58370668	58370912	Xetrov90001082m.g	fam241a
Chr01	182875053	182875478	Xetrov90003623m.g	c6.2
Chr08	52519114	52519299	Xetrov90020817m.g	c6orf136
Chr05	72301744	72302003	Xetrov90014035m.g	cfap206
Chr06	66030219	66030494	Xetrov90016299m.g	c7orf25
Chr04	76109085	76109417	Xetrov90011741m.g	c8a
Chr04	76148639	76149019	Xetrov90011742m.g	c8b
Chr04	76147626	76147843	Xetrov90011742m.g	c8b
Chr01	183647155	183647711	Xetrov90003636m.g	c9
Chr01	119248751	119249160	Xetrov90002280m.g	carnmt1
Chr01	119246549	119246907	Xetrov90002280m.g	carnmt1
Chr08	7102818	7103070	Xetrov90019898m.g	spaca9
Chr03	81861818	81862248	Xetrov90008546m.g	ca12
Chr08	111962438	111962817	Xetrov90022311m.g	ca14
Chr08	111975028	111975718	Xetrov90022311m.g	ca14
Chr06	110384398	110384778	Xetrov90016979m.g	ca2
Chr02	89075757	89075935	Xetrov90005522m.g	ca4.2
Chr04	69379441	69379820	Xetrov90011610m.g	ca7
Chr04	69375917	69376306	Xetrov90011610m.g	ca7
Chr04	90320087	90320258	Xetrov90011997m.g	cacna1e
Chr04	90425575	90425820	Xetrov90011997m.g	cacna1e
Chr06	19916703	19916906	Xetrov90015714m.g	cacnb2
Chr06	19964249	19964968	Xetrov90015714m.g	cacnb2
Chr07	83050804	83051091	Xetrov90018745m.g	cadm1
Chr07	83002122	83002468	Xetrov90018745m.g	cadm1
Chr07	83090463	83090724	Xetrov90018745m.g	cadm1
Chr07	83042827	83043174	Xetrov90018745m.g	cadm1
Chr06	111417196	111417473	Xetrov90016999m.g	calb1
Chr06	111456849	111457055	Xetrov90016999m.g	calb1
Chr03	128893654	128894384	Xetrov90009770m.g	calr
Chr04	127994507	127994760	Xetrov90012813m.g	camk1
Chr04	128009325	128009554	Xetrov90012813m.g	camk1
Chr01	59995556	59995939	Xetrov90001113m.g	camk2d
Chr07	52151647	52151871	Xetrov90018229m.g	camk2g
Chr07	52029897	52030071	Xetrov90018229m.g	camk2g
Chr07	51966829	51967167	Xetrov90018229m.g	camk2g
Chr07	52069787	52070085	Xetrov90018229m.g	camk2g
Chr01	135259190	135259540	Xetrov90002740m.g	camk4
Chr05	14881583	14882056	Xetrov90013147m.g	camkmt
Chr04	116197492	116197749	Xetrov90012563m.g	camkv
Chr03	122272882	122273071	Xetrov90009511m.g	camsap3
Chr10	11888080	11888281	Xetrov90024943m.g	cant1
Chr03	9533493	9533796	Xetrov90007228m.g	canx
Chr06	48660273	48660456	Xetrov90016104m.g	cap2
Chr05	3209812	3210136	Xetrov90012952m.g	capn13
Chr05	3230192	3230438	Xetrov90012952m.g	capn13
Chr05	3564882	3565107	Xetrov90012955m.g	capn14
Chr05	5299140	5299490	Xetrov90013007m.g	capn2
Chr05	5323147	5323343	Xetrov90013008m.g	capn8.1
Chr05	5314755	5315088	Xetrov90013008m.g	capn8.1
Chr05	5319272	5319502	Xetrov90013008m.g	capn8.1
Chr03	128090010	128090295	Xetrov90009727m.g	carm1
Chr02	69684910	69685076	Xetrov90005190m.g	cask
Chr09	13711935	13712165	Xetrov90023256m.g	caskin1
scaffold_113	306547	307109	Xetrov90025909m.g	cass4
scaffold_113	309810	310150	Xetrov90025909m.g	cass4
scaffold_113	322708	323013	Xetrov90025909m.g	cass4
scaffold_113	308733	309129	Xetrov90025909m.g	cass4
scaffold_113	320996	321577	Xetrov90025909m.g	cass4
scaffold_113	318945	319467	Xetrov90025909m.g	cass4
Chr10	33371318	33372045	Xetrov90025432m.g	cbfa2t2
Chr10	33360818	33361326	Xetrov90025432m.g	cbfa2t2
Chr02	99720184	99720498	Xetrov90005702m.g	cblb
Chr10	25672287	25672570	Xetrov90025240m.g	cbln4
Chr01	116779088	116779615	Xetrov90002240m.g	cbwd2
Chr06	33440144	33440371	Xetrov90015919m.g	cbx3
Chr10	24847071	24847432	Xetrov90025233m.g	cbx4
Chr02	142444301	142444549	Xetrov90006455m.g	cbx5
Chr02	142439175	142439369	Xetrov90006455m.g	cbx5
Chr02	142439844	142440587	Xetrov90006455m.g	cbx5
Chr10	24992245	24992803	Xetrov90025234m.g	cbx8
Chr05	25855469	25855719	Xetrov90013308m.g	cfap36
Chr02	105705989	105706236	Xetrov90005804m.g	ccdc138
Chr05	111017035	111017281	Xetrov90014664m.g	ccdc150
Chr05	111016357	111016623	Xetrov90014664m.g	ccdc150
Chr07	85880899	85881238	Xetrov90018830m.g	ccdc153
Chr05	471649	472001	Xetrov90012913m.g	ccdc167
Chr07	78016978	78017132	Xetrov90018681m.g	LOC105945213,ccdc30
Chr10	11255804	11256054	Xetrov90024935m.g	ccdc56
Chr10	11217660	11217937	Xetrov90024935m.g	ccdc56
Chr10	11227610	11228020	Xetrov90024935m.g	ccdc56
Chr02	162654499	162654772	Xetrov90006905m.g	deup1
Chr01	190004964	190005186	Xetrov90003741m.g	ccdc68
Chr01	190009727	190009976	Xetrov90003741m.g	ccdc68
Chr02	165465774	165466251	Xetrov90006936m.g	ccdc81
Chr02	160619871	160620099	Xetrov90006867m.g	ccdc82
Chr05	26256901	26257170	Xetrov90013312m.g	ccdc85a
Chr05	26201232	26201613	Xetrov90013312m.g	ccdc85a
Chr08	69736498	69736753	Xetrov90021283m.g	ccdc85c
Chr08	69737261	69737616	Xetrov90021283m.g	ccdc85c
Chr08	69708931	69709279	Xetrov90021283m.g	ccdc85c
Chr05	20441943	20442515	Xetrov90013218m.g	ccdc88a
Chr05	20427779	20428024	Xetrov90013218m.g	ccdc88a
Chr06	63010691	63010901	Xetrov90016263m.g	cck
Chr06	63007718	63008185	Xetrov90016263m.g	cck
Chr08	18286346	18286784	Xetrov90020215m.g	ccnb3
Chr04	6311185	6311839	Xetrov90010266m.g	ccnd1
Chr04	6377323	6377850	Xetrov90010266m.g	ccnd1
Chr04	6283060	6283525	Xetrov90010266m.g	ccnd1
Chr04	6300533	6301253	Xetrov90010266m.g	ccnd1
Chr04	6321750	6322429	Xetrov90010266m.g	ccnd1
Chr04	6392027	6392688	Xetrov90010266m.g	ccnd1
Chr04	6388837	6389288	Xetrov90010266m.g	ccnd1
Chr04	6386301	6386682	Xetrov90010266m.g	ccnd1
Chr07	109296623	109296812	Xetrov90019385m.g	ccndx
Chr06	115633345	115633598	Xetrov90017066m.g	ccne2
Chr09	16618375	16618813	Xetrov90023374m.g	ccnf
Chr01	94863669	94864179	Xetrov90001834m.g	ccng2
Chr01	94864513	94864865	Xetrov90001834m.g	ccng2
Chr01	94920378	94920684	Xetrov90001834m.g	ccng2
Chr01	94847811	94848199	Xetrov90001833m.g	ccni
Chr01	94848374	94848650	Xetrov90001833m.g	ccni
Chr07	17666799	17667252	Xetrov90017628m.g	ccnj
Chr07	17649844	17650273	Xetrov90017628m.g	ccnj
Chr07	17655799	17656028	Xetrov90017628m.g	ccnj
Chr07	17657686	17657990	Xetrov90017628m.g	ccnj
Chr07	17652440	17652640	Xetrov90017628m.g	ccnj
Chr01	178804821	178805017	Xetrov90003576m.g	ccno
Chr01	51723992	51724210	Xetrov90000993m.g	noct
Chr01	51727941	51728232	Xetrov90000993m.g	noct
Chr01	51729596	51729904	Xetrov90000993m.g	noct
Chr05	27987607	27987974	Xetrov90013331m.g	cct4
Chr03	7871127	7871413	Xetrov90007199m.g	cd74
Chr03	7879621	7879889	Xetrov90007199m.g	cd74
Chr04	3585576	3585838	Xetrov90010176m.g	cd82
Chr05	20726336	20726715	Xetrov90013223m.g	cd93
Chr03	124194482	124194776	Xetrov90009566m.g	cd97
Chr03	124192598	124192824	Xetrov90009566m.g	cd97
Chr01	178887508	178887874	Xetrov90003579m.g	cdc20b
Chr06	5144774	5145303	Xetrov90015535m.g	cdc25a
Chr01	9378620	9378998	Xetrov90000269m.g	cdc25b
Chr01	9372290	9372558	Xetrov90000269m.g	cdc25b
Chr01	9366990	9367279	Xetrov90000269m.g	cdc25b
Chr01	9399638	9399979	Xetrov90000269m.g	cdc25b
Chr01	9374511	9374735	Xetrov90000269m.g	cdc25b
Chr01	9365120	9365993	Xetrov90000269m.g	cdc25b
Chr05	74465199	74465422	Xetrov90014058m.g	cdc40
Chr07	68626494	68626677	Xetrov90018487m.g	cdc42
Chr04	35571584	35571992	Xetrov90010935m.g	cdc42ep2
Chr10	24572956	24573461	Xetrov90025223m.g	cdc42ep4
Chr10	24562771	24563066	Xetrov90025223m.g	cdc42ep4
Chr10	24571463	24571688	Xetrov90025223m.g	cdc42ep4
Chr01	126906744	126906978	Xetrov90002389m.g	cdc42se2l
Chr04	94824541	94824857	Xetrov90012080m.g	cdc7
Chr09	61643401	61643837	Xetrov90024255m.g	cdca7
Chr04	63861824	63862129	Xetrov90011530m.g	cdh1
Chr06	56462019	56462320	Xetrov90016202m.g	cdh10
Chr04	59729440	59729859	Xetrov90011418m.g	cdh11
Chr04	59403368	59403965	Xetrov90011418m.g	cdh11
Chr04	59369868	59370239	Xetrov90011418m.g	cdh11
Chr04	59367125	59367432	Xetrov90011418m.g	cdh11
Chr06	57115348	57115765	Xetrov90016204m.g	cdh12
Chr06	56664872	56665132	Xetrov90016204m.g	cdh12
Chr04	65500123	65500298	Xetrov90011552m.g	cdh13
Chr04	65420721	65420900	Xetrov90011552m.g	cdh13
Chr04	65497123	65497453	Xetrov90011552m.g	cdh13
Chr04	65470858	65471206	Xetrov90011552m.g	cdh13
Chr06	58264692	58264981	Xetrov90016208m.g	cdh18
Chr06	86929727	86929969	Xetrov90016604m.g	cdh19
Chr06	96146930	96147397	Xetrov90016744m.g	cdh2
Chr06	96091189	96091411	Xetrov90016744m.g	cdh2
Chr06	96145805	96146340	Xetrov90016744m.g	cdh2
Chr06	96119502	96119803	Xetrov90016744m.g	cdh2
Chr07	93495199	93495716	Xetrov90018933m.g	megf6
Chr07	93514092	93514486	Xetrov90018933m.g	megf6
Chr04	63919398	63920168	Xetrov90011532m.g	cdh3
Chr04	60355446	60355733	Xetrov90011422m.g	cdh5
Chr04	60306843	60307256	Xetrov90011422m.g	cdh5
Chr06	54393412	54393628	Xetrov90016196m.g	cdh6
Chr06	54355794	54356287	Xetrov90016196m.g	cdh6
Chr06	87390947	87391419	Xetrov90016605m.g	cdh7
Chr04	58549976	58550477	Xetrov90011416m.g	cdh8
Chr04	58550564	58550885	Xetrov90011416m.g	cdh8
Chr04	58693704	58693919	Xetrov90011416m.g	cdh8
Chr07	8433481	8433661	Xetrov90017489m.g	cdk1
Chr07	70983378	70983623	Xetrov90018543m.g	cdk11b
Chr10	3266897	3267094	Xetrov90024696m.g	cdk12
Chr10	3259427	3259899	Xetrov90024696m.g	cdk12
Chr09	47145808	47146227	Xetrov90023959m.g	cdk15
Chr09	47113752	47114516	Xetrov90023959m.g	cdk15
Chr05	74316851	74317093	Xetrov90014054m.g	cdk19
Chr10	6688926	6689399	Xetrov90024795m.g	cdk5r1
Chr10	17278965	17279220	Xetrov90025085m.g	cdk5rap1
Chr10	4687434	4688069	Xetrov90024748m.g	cdk5rap3
Chr10	4694351	4694730	Xetrov90024748m.g	cdk5rap3
Chr02	67907068	67907337	Xetrov90005148m.g	cdkn1a
Chr01	35997082	35997308	Xetrov90000761m.g	cdkn2aip
Chr01	35993579	35994015	Xetrov90000761m.g	cdkn2aip
Chr01	109003535	109003754	Xetrov90002121m.g	cdkn2b
Chr07	109539986	109540735	Xetrov90019388m.g	cdknx
Chr07	109550826	109551162	Xetrov90019388m.g	cdknx
Chr07	109561743	109562153	Xetrov90019388m.g	cdknx
Chr01	92649947	92650461	Xetrov90001806m.g	cds1
Chr01	92616881	92617141	Xetrov90001806m.g	cds1
Chr04	60880023	60880390	Xetrov90011442m.g	cdt1
Chr06	71579678	71579869	Xetrov90016374m.g	cdv3
Chr03	7369088	7369454	Xetrov90007180m.g	cdx1
Chr03	7376026	7376552	Xetrov90007180m.g	cdx1
Chr03	7370868	7371301	Xetrov90007180m.g	cdx1
Chr03	7380270	7380814	Xetrov90007180m.g	cdx1
Chr03	7374347	7374612	Xetrov90007180m.g	cdx1
Chr03	7357089	7357574	Xetrov90007180m.g	cdx1
Chr02	152168211	152168671	Xetrov90006715m.g	cdx2
Chr02	152145227	152145604	Xetrov90006715m.g	cdx2
Chr02	152148681	152149111	Xetrov90006715m.g	cdx2
Chr02	152156165	152156515	Xetrov90006715m.g	cdx2
Chr08	25858554	25858795	Xetrov90020390m.g	cdx4
Chr08	25860110	25860609	Xetrov90020390m.g	cdx4
Chr08	25858995	25859334	Xetrov90020390m.g	cdx4
Chr01	127355382	127355814	Xetrov90002411m.g	cebpe
Chr04	8006298	8006667	Xetrov90010352m.g	celf1
Chr03	73606387	73606664	Xetrov90008371m.g	celf2
Chr03	73343829	73344091	Xetrov90008371m.g	celf2
scaffold_2110	528	1030	Xetrov90027185m.g	celf3
Chr03	65020066	65020420	Xetrov90008233m.g	celsr1
Chr03	65026999	65027339	Xetrov90008233m.g	celsr1
Chr02	76702553	76702830	Xetrov90005291m.g	celsr2
Chr02	76674523	76674705	Xetrov90005291m.g	celsr2
Chr01	64026612	64026886	Xetrov90001169m.g	cenpe
Chr01	64039256	64039463	Xetrov90001169m.g	cenpe
Chr02	31601983	31602275	Xetrov90004368m.g	cenpv
Chr01	160769232	160769503	Xetrov90003284m.g	cep120
Chr01	160746823	160746994	Xetrov90003284m.g	cep120
Chr08	62419764	62420031	Xetrov90021167m.g	cep128
Chr01	31500335	31500876	Xetrov90000680m.g	cep135
Chr05	130029034	130029543	Xetrov90015081m.g	cep19
Chr07	27703494	27703682	Xetrov90017789m.g	cep55
Chr01	111978043	111978788	Xetrov90002179m.g	cer1
Chr01	111980254	111980707	Xetrov90002179m.g	cer1
Chr01	111961786	111962187	Xetrov90002179m.g	cer1
Chr01	111953571	111953812	Xetrov90002179m.g	cer1
Chr08	8025280	8025598	Xetrov90019940m.g	cerk[provLOC779592]
Chr08	8013165	8013525	Xetrov90019940m.g	cerk[provLOC779592]
Chr02	146076058	146076345	Xetrov90006574m.g	cers5
Chr02	146074464	146075153	Xetrov90006574m.g	cers5
Chr01	170791045	170791434	Xetrov90003449m.g	cetn3
Chr04	51427191	51427379	Xetrov90011318m.g	cfdp1
scaffold_273	125269	125684	Xetrov90027699m.g	cgn
Chr08	95278052	95278549	Xetrov90021816m.g	chac1
Chr01	129613954	129614156	Xetrov90002570m.g	chd8
Chr01	30767549	30767845	Xetrov90000666m.g	chic2
Chr01	30780138	30780288	Xetrov90000666m.g	chic2
Chr01	30740774	30741318	Xetrov90000666m.g	chic2
Chr04	42134536	42134777	Xetrov90011190m.g	chka
Chr08	43258711	43259018	Xetrov90020572m.g	chmp1b
Chr10	33139393	33139736	Xetrov90025426m.g	chmp4b
Chr10	33197918	33198096	Xetrov90025426m.g	chmp4b
scaffold_29	917523	917752	Xetrov90027859m.g	chmp5
Chr10	18880409	18880802	Xetrov90025105m.g	chmp6
Chr10	18943662	18944064	Xetrov90025105m.g	chmp6
Chr09	59297911	59298220	Xetrov90024206m.g	chn2
Chr08	95392162	95392496	Xetrov90021821m.g	chp1
Chr08	95401485	95401894	Xetrov90021821m.g	chp1
Chr05	111455683	111456208	Xetrov90014683m.g	chrd.1
Chr05	111461014	111461516	Xetrov90014683m.g	chrd.1
Chr05	111448419	111448943	Xetrov90014683m.g	chrd.1
Chr05	111437579	111438136	Xetrov90014683m.g	chrd.1
Chr05	111462753	111463002	Xetrov90014683m.g	chrd.1
Chr05	111441121	111441486	Xetrov90014683m.g	chrd.1
Chr05	111464400	111464757	Xetrov90014683m.g	chrd.1
Chr08	30256692	30256967	Xetrov90020437m.g	chrdl1
Chr04	5246849	5247074	Xetrov90010234m.g	chrm4
Chr03	85825110	85825557	Xetrov90008672m.g	chrna5
Chr02	106684223	106684421	Xetrov90005815m.g	chst10
Chr07	51036071	51036469	Xetrov90018215m.g	chst3
Chr07	51031219	51031595	Xetrov90018215m.g	chst3
Chr08	50466584	50466767	Xetrov90020747m.g	chst4
Chr02	111345939	111346163	Xetrov90005913m.g	chst7
Chr04	19906542	19906870	Xetrov90010660m.g	chst8
Chr04	20177288	20177629	Xetrov90010660m.g	chst8
Chr04	19899903	19900230	Xetrov90010660m.g	chst8
Chr03	105861704	105861951	Xetrov90008994m.g	chsy1
Chr03	105848053	105848439	Xetrov90008994m.g	chsy1
Chr09	10541178	10541586	Xetrov90023153m.g	chtf18
Chr04	28280849	28281148	Xetrov90010803m.g	ciapin1
Chr07	99193480	99194000	Xetrov90019090m.g	cic
Chr01	81009564	81009831	Xetrov90001462m.g	cirbp
Chr01	81006979	81007329	Xetrov90001462m.g	cirbp
Chr02	57849580	57850054	Xetrov90004944m.g	cited4
Chr02	57839204	57839608	Xetrov90004944m.g	cited4
Chr02	147271401	147271647	Xetrov90006615m.g	ckap2
Chr02	147265367	147265830	Xetrov90006615m.g	ckap2
Chr02	147269911	147270259	Xetrov90006615m.g	ckap2
Chr03	11740880	11741154	Xetrov90007264m.g	ckap4
Chr04	96601357	96601764	Xetrov90012110m.g	clca3
Chr01	40755378	40755586	Xetrov90000805m.g	clcn3
Chr01	40742618	40743115	Xetrov90000805m.g	clcn3
Chr05	99645325	99645560	Xetrov90014438m.g	cldn16
Chr02	38133982	38134262	Xetrov90004501m.g	cldn3
Chr02	38105433	38105735	Xetrov90004500m.g	cldn4
Chr09	7064458	7065063	Xetrov90022954m.g	cldn6.2
Chr09	7073724	7074004	Xetrov90022954m.g	cldn6.2
Chr09	7065218	7066125	Xetrov90022954m.g	cldn6.2
scaffold_1648	2431	2677	Xetrov90026679m.g	cldn7
Chr02	11900223	11900458	Xetrov90004103m.g	cldn8.4
Chr02	11793811	11794176	Xetrov90004100m.g	cldn8.1
Chr07	102465465	102465678	Xetrov90019185m.g	clec11a
Chr09	31300717	31300960	Xetrov90023683m.g	clec16a
Chr01	51186536	51186786	Xetrov90000976m.g	clgn
Chr03	6651029	6651331	Xetrov90007171m.g	clint1
Chr02	97077372	97077624	Xetrov90005663m.g	clip2
Chr08	117593064	117593270	Xetrov90022497m.g	clk2
Chr08	117612349	117612728	Xetrov90022498m.g	clk2[provLOC108644518]
Chr08	67634933	67635223	Xetrov90021263m.g	clmn
Chr08	67640600	67640967	Xetrov90021263m.g	clmn
Chr07	54610350	54610728	Xetrov90018282m.g	clmp
Chr05	112211224	112211603	Xetrov90014695m.g	cln8
Chr08	49989038	49989214	Xetrov90020720m.g	clptm1
Chr05	114859054	114859456	Xetrov90014733m.g	clrn1
Chr02	117486125	117486300	Xetrov90006006m.g	clybl
Chr06	29116869	29117227	Xetrov90015851m.g	cmahp
Chr04	55020853	55021193	Xetrov90011385m.g	cmip
Chr04	55044785	55045226	Xetrov90011385m.g	cmip
Chr04	55019980	55020173	Xetrov90011385m.g	cmip
Chr04	55010233	55010454	Xetrov90011385m.g	cmip
Chr01	127541877	127542164	Xetrov90002420m.g	cmtm5
Chr01	127545719	127546289	Xetrov90002420m.g	cmtm5
Chr06	74018099	74018426	Xetrov90016419m.g	cmtm6
Chr06	74061941	74062554	Xetrov90016420m.g	cmtm7
Chr06	74086262	74086532	Xetrov90016420m.g	cmtm7
Chr06	74111072	74111601	Xetrov90016421m.g	cmtm8
Chr06	74105820	74106146	Xetrov90016421m.g	cmtm8
scaffold_21	1593739	1594087	Xetrov90027135m.g	cndp1
Chr08	74312998	74313224	Xetrov90021346m.g	cnih1
Chr08	74271433	74271622	Xetrov90021346m.g	cnih1
Chr08	74262332	74262878	Xetrov90021346m.g	cnih1
Chr08	74220973	74221349	Xetrov90021346m.g	cnih1
Chr08	74258252	74258965	Xetrov90021346m.g	cnih1
Chr02	51179543	51179793	Xetrov90004769m.g	cnksr1
Chr05	42631200	42631563	Xetrov90013571m.g	cnksr3
Chr03	109012275	109012630	Xetrov90009115m.g	cnnm3
Chr01	91269002	91269330	Xetrov90001776m.g	cnot6l
Chr01	91263346	91263553	Xetrov90001776m.g	cnot6l
Chr09	77841593	77841824	Xetrov90024511m.g	cnppd1
Chr05	86686069	86686251	Xetrov90014241m.g	cnr1
Chr02	54823028	54823659	Xetrov90004871m.g	cnr2
Chr05	30984993	30985702	Xetrov90013378m.g	cnrip1
Chr01	105791790	105792132	Xetrov90002080m.g	cntln
Chr04	119141905	119142152	Xetrov90012651m.g	cntn4
Chr10	11843398	11843627	Xetrov90024941m.g	cntnap1
Chr06	64241031	64241266	Xetrov90016284m.g	cntnap2
Chr01	124894073	124894437	Xetrov90002359m.g	cntnap4
Chr02	140469027	140469277	Xetrov90006416m.g	col2a1
Chr02	113900756	113901064	Xetrov90005965m.g	col4a1
Chr08	29646305	29646540	Xetrov90020428m.g	col4a6
Chr09	39673189	39673693	Xetrov90023825m.g	col5a2
Chr04	99540456	99540711	Xetrov90012178m.g	col11a1
Chr02	83911042	83911263	Xetrov90005420m.g	col9a2
Chr05	28036142	28036537	Xetrov90013332m.g	commd1
Chr01	163217919	163218230	Xetrov90003311m.g	commd10
Chr06	18598628	18598993	Xetrov90015698m.g	commd3
Chr01	29323069	29323412	Xetrov90000640m.g	commd8
Chr09	9998068	9998472	Xetrov90023124m.g	cops3
Chr06	104338512	104338877	Xetrov90016883m.g	cops5
scaffold_48	97700	98016	Xetrov90028982m.g	cops6
Chr09	48493063	48493365	Xetrov90023972m.g	cops8
Chr02	142371452	142371640	Xetrov90006447m.g	copz1
Chr03	116406405	116406635	Xetrov90009259m.g	coro2b
Chr04	64649288	64649530	Xetrov90011542m.g	cotl1
Chr09	22401362	22401694	Xetrov90023519m.g	cox19
Chr09	22401012	22401175	Xetrov90023519m.g	cox19
Chr03	108867425	108867618	Xetrov90009110m.g	cox5b.1
Chr07	114594104	114594355	Xetrov90019549m.g	cox6b1
Chr05	82278552	82278816	Xetrov90014178m.g	cox7a2
Chr05	13096403	13096865	Xetrov90013128m.g	cox7a2l
Chr05	13108465	13108724	Xetrov90013128m.g	cox7a2l
Chr05	13105518	13105797	Xetrov90013128m.g	cox7a2l
Chr05	118680482	118680684	Xetrov90014783m.g	cpb1
Chr01	42036529	42036751	Xetrov90000824m.g	cpe
Chr01	42006742	42007145	Xetrov90000824m.g	cpe
Chr01	42031172	42031589	Xetrov90000824m.g	cpe
Chr01	17223727	17224044	Xetrov90000466m.g	cpeb2
Chr01	17233451	17233764	Xetrov90000466m.g	cpeb2
Chr01	17200061	17200281	Xetrov90000466m.g	cpeb2
Chr01	17174935	17175271	Xetrov90000466m.g	cpeb2
Chr01	17187395	17187757	Xetrov90000466m.g	cpeb2
Chr01	17201973	17202439	Xetrov90000466m.g	cpeb2
Chr01	17169830	17170036	Xetrov90000466m.g	cpeb2
Chr03	49550578	49550891	Xetrov90008013m.g	cpm
Chr07	27375989	27376361	Xetrov90017784m.g	cpn1
Chr04	53869916	53870119	Xetrov90011349m.g	cpne2
Chr06	71905969	71906445	Xetrov90016378m.g	cpne4
Chr03	65460801	65461137	Xetrov90008241m.g	cpne8
Chr10	24586192	24586611	Xetrov90025224m.g	cpsf4l
Chr08	111035469	111035708	Xetrov90022288m.g	crabp2
Chr08	111030567	111030855	Xetrov90022288m.g	crabp2
Chr04	35191232	35191629	Xetrov90010913m.g	cracr2b
Chr08	5176514	5176794	Xetrov90019849m.g	crata
scaffold_283	180261	180578	Xetrov90027805m.g	creb3l2
scaffold_283	190208	190458	Xetrov90027805m.g	creb3l2
Chr06	32260854	32261084	Xetrov90015890m.g	creb5
Chr06	32249310	32249572	Xetrov90015890m.g	creb5
Chr02	106908553	106908890	Xetrov90005826m.g	creg2
Chr02	106914155	106914405	Xetrov90005826m.g	creg2
Chr06	13403824	13404126	Xetrov90015624m.g	crem
Chr03	96886655	96886852	Xetrov90008858m.g	crtc3
Chr08	58432858	58433181	Xetrov90021015m.g	crx
Chr08	58437377	58437922	Xetrov90021015m.g	crx
Chr08	58427706	58427995	Xetrov90021015m.g	crx
Chr08	58438371	58438962	Xetrov90021015m.g	crx
Chr01	139292863	139293425	Xetrov90002805m.g	crybb2
Chr01	139324423	139324652	Xetrov90002805m.g	crybb2
Chr02	155868154	155868634	Xetrov90006789m.g	cryl1
Chr02	10050151	10050435	Xetrov90004056m.g	cryzl1
Chr02	134043969	134044401	Xetrov90006230m.g	cs
Chr10	29836983	29837537	Xetrov90025307m.g	cse1l
Chr02	84099946	84100136	Xetrov90005421m.g	csmd2
Chr02	84093987	84094376	Xetrov90005421m.g	csmd2
Chr03	31902782	31903008	Xetrov90007626m.g	csnk1a1
Chr03	84917102	84917538	Xetrov90008633m.g	csnk1g1
Chr06	5644448	5644773	Xetrov90015551m.g	csrnp1
Chr06	5697923	5698371	Xetrov90015551m.g	csrnp1
Chr06	5711070	5711587	Xetrov90015551m.g	csrnp1
Chr06	5697018	5697461	Xetrov90015551m.g	csrnp1
Chr06	5620888	5621187	Xetrov90015551m.g	csrnp1
Chr06	5710410	5710786	Xetrov90015551m.g	csrnp1
Chr02	138970330	138970546	Xetrov90006375m.g	csrnp2
scaffold_1115	12160	12309	Xetrov90025882m.g	cstf3
Chr01	14337682	14337984	Xetrov90000404m.g	ctbp1
Chr03	38593739	38593911	Xetrov90007777m.g	ctbp2l
Chr06	28583897	28584297	Xetrov90015839m.g	ctdp1
Chr06	118419487	118419889	Xetrov90017099m.g	cthrc1
Chr01	191992886	191993183	Xetrov90003781m.g	ctif
Chr06	70885656	70885885	Xetrov90016360m.g	ctnnb1
Chr06	70762983	70763291	Xetrov90016360m.g	ctnnb1
Chr06	70863195	70863570	Xetrov90016360m.g	ctnnb1
Chr06	70848361	70848715	Xetrov90016360m.g	ctnnb1
Chr06	70744942	70745234	Xetrov90016360m.g	ctnnb1
Chr06	70820112	70820872	Xetrov90016360m.g	ctnnb1
Chr06	70904451	70905257	Xetrov90016360m.g	ctnnb1
Chr06	70809207	70809449	Xetrov90016360m.g	ctnnb1
Chr06	70788042	70788635	Xetrov90016360m.g	ctnnb1
Chr02	164786746	164787011	Xetrov90006925m.g	ctsc
Chr04	6592854	6593468	Xetrov90010270m.g	cttn
Chr02	73627573	73627833	Xetrov90005246m.g	cttnbp2nl,cttnbp2nl-like
Chr02	73739018	73739258	Xetrov90005246m.g	cttnbp2nl,cttnbp2nl-like
Chr07	33855294	33855657	Xetrov90017934m.g	cuedc2
Chr07	33924857	33925109	Xetrov90017934m.g	cuedc2
Chr06	13464725	13464908	Xetrov90015626m.g	cul2
Chr06	13485417	13485669	Xetrov90015626m.g	cul2
Chr05	120351994	120352433	Xetrov90014812m.g	cul3
Chr05	120341484	120341726	Xetrov90014812m.g	cul3
Chr05	120361007	120361254	Xetrov90014812m.g	cul3
Chr02	42160051	42160472	Xetrov90004589m.g	cux1
Chr01	154826857	154827170	Xetrov90003176m.g	cux2
Chr09	58038578	58038839	Xetrov90024180m.g	cwc22
Chr02	23509196	23509410	Xetrov90004204m.g	cxadr
Chr02	23508471	23509005	Xetrov90004204m.g	cxadr
Chr02	23492447	23492787	Xetrov90004204m.g	cxadr
Chr07	37849127	37849798	Xetrov90018006m.g	cxcl12
Chr07	37845700	37845960	Xetrov90018006m.g	cxcl12
scaffold_51	218338	218741	Xetrov90029241m.g	cxcl2
Chr09	76776085	76776551	Xetrov90024471m.g	cxcr4
Chr09	76769992	76770559	Xetrov90024471m.g	cxcr4
Chr09	76782158	76782565	Xetrov90024471m.g	cxcr4
Chr09	76768559	76768816	Xetrov90024471m.g	cxcr4
Chr09	76777205	76777661	Xetrov90024471m.g	cxcr4
Chr10	7684058	7684666	Xetrov90024836m.g	cyb561
Chr10	7728723	7729270	Xetrov90024836m.g	cyb561
Chr04	62314125	62314310	Xetrov90011496m.g	cyb5b
Chr02	97538488	97538741	Xetrov90005673m.g	cyb5d2
Chr06	33983659	33983838	Xetrov90015929m.g	cycs
Chr02	111289162	111289348	Xetrov90005910m.g	cyfip1
Chr10	36772768	36773015	Xetrov90025600m.g	cygb
Chr07	17012770	17013204	Xetrov90017614m.g	cyp26a1
Chr07	17022270	17022582	Xetrov90017614m.g	cyp26a1
Chr07	17015313	17015549	Xetrov90017614m.g	cyp26a1
Chr07	16999996	17000334	Xetrov90017614m.g	cyp26a1
Chr07	17001384	17001671	Xetrov90017614m.g	cyp26a1
Chr02	138553582	138553846	Xetrov90006359m.g	cyp27b1
Chr06	103488281	103488625	Xetrov90016859m.g	cyp7b1
Chr07	106681165	106681484	Xetrov90019329m.g	cyth1
Chr09	19516621	19516849	Xetrov90023446m.g	cyth3
Chr09	19536245	19536448	Xetrov90023446m.g	cyth3
Chr08	82856370	82856711	Xetrov90021535m.g	daam1
Chr02	124401158	124401440	Xetrov90006088m.g	dach1
Chr02	124383411	124383807	Xetrov90006088m.g	dach1
Chr08	83064841	83065100	Xetrov90021540m.g	dact1
Chr04	115198857	115199267	Xetrov90012533m.g	dag1
Chr04	115321675	115322181	Xetrov90012533m.g	dag1
Chr04	115198187	115198519	Xetrov90012533m.g	dag1
Chr04	115225754	115226383	Xetrov90012533m.g	dag1
Chr04	115318625	115318918	Xetrov90012533m.g	dag1
Chr03	81595526	81595914	Xetrov90008542m.g	dapk2
Chr03	81601521	81601807	Xetrov90008542m.g	dapk2
Chr01	74282698	74283023	Xetrov90001314m.g	dapk3
scaffold_21	1564708	1565239	Xetrov90027134m.g	darmin
Chr09	76815585	76815945	Xetrov90024473m.g	dars1
Chr09	76851167	76851392	Xetrov90024473m.g	dars1
Chr09	76845212	76845412	Xetrov90024473m.g	dars1
Chr01	80552117	80552468	Xetrov90001454m.g	dazap1
scaffold_84	651831	652183	Xetrov90030661m.g	dbx1
scaffold_84	660594	661282	Xetrov90030661m.g	dbx1
Chr06	118317242	118317448	Xetrov90017094m.g	dcaf13
Chr02	64506103	64506419	Xetrov90005076m.g	dcaf6
Chr10	7943021	7943199	Xetrov90024843m.g	dcaf7
Chr05	69874355	69875227	Xetrov90014008m.g	dcbld1
Chr05	69876877	69877181	Xetrov90014008m.g	dcbld1
Chr05	69880906	69881171	Xetrov90014008m.g	dcbld1
Chr02	23886758	23887244	Xetrov90004212m.g	dcbld2
Chr02	75968377	75968677	Xetrov90005268m.g	dclre1b
Chr03	46106796	46107047	Xetrov90007920m.g	dcn
Chr03	46115357	46116049	Xetrov90007920m.g	dcn
scaffold_464	1287	1504	Xetrov90028919m.g	dcp1a
scaffold_41	826354	826901	Xetrov90028664m.g	dcp1b
Chr07	46669499	46669795	Xetrov90018171m.g	dcps
Chr01	36402410	36402614	Xetrov90000765m.g	dctd
Chr09	18535777	18536556	Xetrov90023412m.g	dcun1d3
Chr07	35158539	35158779	Xetrov90017952m.g	ddit4
Chr07	35152762	35153238	Xetrov90017952m.g	ddit4
Chr07	35156296	35156855	Xetrov90017952m.g	ddit4
Chr07	35167097	35167443	Xetrov90017952m.g	ddit4
Chr07	35152038	35152276	Xetrov90017952m.g	ddit4
Chr07	35162618	35163181	Xetrov90017952m.g	ddit4
Chr07	35166107	35166518	Xetrov90017952m.g	ddit4
Chr02	156648864	156649174	Xetrov90006800m.g	ddx10
Chr02	156655942	156656210	Xetrov90006800m.g	ddx10
Chr02	132743942	132744513	Xetrov90006193m.g	ddx23
Chr08	6963600	6963954	Xetrov90019892m.g	ddx31[provLOC105948058]
Chr08	6964812	6965331	Xetrov90019892m.g	ddx31[provLOC105948058]
Chr01	178505991	178506270	Xetrov90003569m.g	ddx4
Chr04	35742938	35743288	Xetrov90010938m.g	deaf1
Chr05	5138606	5138867	Xetrov90013003m.g	degs1
Chr04	80387530	80387821	Xetrov90011816m.g	depdc1
Chr01	176692576	176692908	Xetrov90003537m.g	depdc1b
Chr04	9356540	9356863	Xetrov90010383m.g	depdc7
Chr04	9351434	9351797	Xetrov90010383m.g	depdc7
Chr04	104002036	104002294	Xetrov90012249m.g	desi1
Chr06	34080498	34080825	Xetrov90015932m.g	gsdme
Chr06	34082667	34082977	Xetrov90015932m.g	gsdme
Chr08	22746657	22746957	Xetrov90020292m.g	dgat2l6
Chr02	134674658	134674876	Xetrov90006259m.g	dgka
Chr10	18306932	18307206	Xetrov90025092m.g	dgke
Chr04	5333567	5333816	Xetrov90010238m.g	dgkz
Chr02	133253157	133253553	Xetrov90006208m.g	dhh
Chr02	133216409	133216747	Xetrov90006208m.g	dhh
Chr02	133232243	133232433	Xetrov90006208m.g	dhh
Chr02	133236934	133237189	Xetrov90006208m.g	dhh
Chr02	133247483	133247801	Xetrov90006208m.g	dhh
Chr02	147120425	147120930	Xetrov90006609m.g	dhrs12
Chr07	77089970	77090352	Xetrov90018658m.g	dhrs3
Chr07	77077131	77077658	Xetrov90018658m.g	dhrs3
Chr07	77079832	77080300	Xetrov90018658m.g	dhrs3
Chr07	77100383	77100880	Xetrov90018658m.g	dhrs3
Chr07	77077907	77078160	Xetrov90018658m.g	dhrs3
Chr07	77087583	77087917	Xetrov90018658m.g	dhrs3
Chr02	34344853	34345451	Xetrov90004431m.g	dhrsx
Chr01	21250641	21250917	Xetrov90000529m.g	dhx15
Chr08	52399833	52400099	Xetrov90020811m.g	dhx16
Chr03	18635890	18636172	Xetrov90007420m.g	diaph1
Chr08	33229549	33230086	Xetrov90020469m.g	diaph2
Chr08	33206514	33206757	Xetrov90020469m.g	diaph2
Chr08	33281449	33281779	Xetrov90020469m.g	diaph2
Chr08	33215642	33216072	Xetrov90020469m.g	diaph2
Chr08	33189734	33189956	Xetrov90020469m.g	diaph2
Chr02	126759954	126760394	Xetrov90006104m.g	diaph3
Chr09	55916890	55917167	Xetrov90024123m.g	dip2a
Chr06	10808631	10808886	Xetrov90015608m.g	dip2c
Chr04	80272150	80272417	Xetrov90011812m.g	diras3
Chr03	117182420	117182710	Xetrov90009286m.g	dis3l
Chr05	5859747	5859937	Xetrov90013020m.g	disp1
Chr05	5856014	5856407	Xetrov90013020m.g	disp1
Chr05	5860183	5860691	Xetrov90013020m.g	disp1
Chr07	5560578	5561626	Xetrov90017466m.g	dkk1
Chr07	5633198	5634060	Xetrov90017466m.g	dkk1
Chr07	5563282	5563542	Xetrov90017466m.g	dkk1
Chr07	5562430	5562824	Xetrov90017466m.g	dkk1
Chr07	5622223	5622821	Xetrov90017466m.g	dkk1
Chr07	5571894	5572223	Xetrov90017466m.g	dkk1
Chr07	5623689	5624449	Xetrov90017466m.g	dkk1
Chr07	5565845	5566464	Xetrov90017466m.g	dkk1
Chr10	3567132	3567532	Xetrov90024708m.g	dkkx
Chr10	3562869	3563219	Xetrov90024708m.g	dkkx
Chr08	60649934	60650404	Xetrov90021085m.g	dlc
Chr08	60642683	60643113	Xetrov90021085m.g	dlc
Chr08	60656485	60656746	Xetrov90021085m.g	dlc
Chr08	60649469	60649743	Xetrov90021085m.g	dlc
Chr08	60651867	60652362	Xetrov90021085m.g	dlc
Chr08	60657157	60657543	Xetrov90021085m.g	dlc
Chr01	31858013	31858251	Xetrov90000693m.g	dlc1
Chr01	31915635	31916047	Xetrov90000693m.g	dlc1
Chr01	31859130	31859447	Xetrov90000693m.g	dlc1
Chr01	31816582	31816801	Xetrov90000693m.g	dlc1
Chr05	97793461	97793742	Xetrov90014404m.g	dlg1
Chr02	56650735	56651048	Xetrov90004923m.g	dlgap3
Chr10	31312458	31312863	Xetrov90025378m.g	dlgap4
Chr10	31308344	31308534	Xetrov90025378m.g	dlgap4
Chr10	31309219	31309624	Xetrov90025378m.g	dlgap4
Chr05	39876837	39877017	Xetrov90013504m.g	dll1
Chr05	39895114	39895546	Xetrov90013504m.g	dll1
Chr05	39805950	39806213	Xetrov90013504m.g	dll1
Chr05	39900135	39900602	Xetrov90013504m.g	dll1
Chr05	39803793	39804229	Xetrov90013504m.g	dll1
scaffold_73	1004268	1004827	Xetrov90030193m.g	dlx6
Chr04	82791111	82791302	Xetrov90011846m.g	dmap1
Chr04	80963238	80963721	Xetrov90011822m.g	dmbx1
Chr04	80953555	80953871	Xetrov90011822m.g	dmbx1
Chr02	104815924	104816310	Xetrov90005787m.g	dmd.1
Chr02	104790149	104790386	Xetrov90005787m.g	dmd.1
Chr02	104100616	104101064	Xetrov90005784m.g	dmd.3
Chr02	104067372	104067651	Xetrov90005784m.g	dmd.3
Chr02	104106557	104107076	Xetrov90005784m.g	dmd.3
Chr02	104256717	104256999	Xetrov90005784m.g	dmd.3
Chr01	116320466	116320784	Xetrov90002233m.g	dmrt2
Chr01	109075148	109075413	Xetrov90002122m.g	dmrta1
Chr01	109121862	109122492	Xetrov90002122m.g	dmrta1
Chr01	109091587	109091767	Xetrov90002122m.g	dmrta1
Chr04	85834333	85834800	Xetrov90011892m.g	dmrta2
Chr01	162156841	162157025	Xetrov90003307m.g	dmxl1
Chr01	162113262	162113519	Xetrov90003307m.g	dmxl1
Chr03	92778413	92778610	Xetrov90008785m.g	dmxl2
Chr06	42517451	42517724	Xetrov90016031m.g	dnah11
Chr08	111068980	111069644	Xetrov90022289m.g	dnaja4.2
Chr08	111063179	111063588	Xetrov90022289m.g	dnaja4.2
Chr07	35219922	35220262	Xetrov90017953m.g	dnajb12
scaffold_314	132804	133051	Xetrov90028018m.g	dnajb13
Chr06	9926478	9926679	Xetrov90015603m.g	dnajb6
Chr03	56235505	56235765	Xetrov90008118m.g	dnajb9
Chr04	10173128	10173339	Xetrov90010397m.g	dnajc24
Chr04	10165821	10166172	Xetrov90010397m.g	dnajc24
Chr04	10107512	10107879	Xetrov90010397m.g	dnajc24
Chr06	103802134	103802527	Xetrov90016866m.g	dnajc5b
Chr06	103801324	103801513	Xetrov90016866m.g	dnajc5b
Chr08	85335994	85336538	Xetrov90021613m.g	dnal1
Chr07	27274252	27274561	Xetrov90017783m.g	dnmbp
Chr07	27264223	27264591	Xetrov90017783m.g	dnmbp
Chr09	78494745	78494975	Xetrov90024527m.g	dnpep
Chr07	17956465	17956917	Xetrov90017634m.g	dntt
Chr03	57041776	57042032	Xetrov90008124m.g	dock4
Chr01	116743318	116743652	Xetrov90002238m.g	dock8
Chr10	25970458	25970780	Xetrov90025241m.g	dok5
Chr01	15853953	15854169	Xetrov90000429m.g	dok7
Chr08	56221985	56222255	Xetrov90020945m.g	dpf1
Chr08	56284376	56284752	Xetrov90020945m.g	dpf1
Chr08	56252855	56253056	Xetrov90020945m.g	dpf1
Chr08	56289827	56290332	Xetrov90020945m.g	dpf1
Chr08	56281654	56281908	Xetrov90020945m.g	dpf1
Chr06	8317700	8318052	Xetrov90015581m.g	dpp6
Chr02	68388623	68389040	Xetrov90005163m.g	dpt
Chr04	92112116	92112451	Xetrov90012035m.g	dpyd
Chr07	54004403	54004800	Xetrov90018264m.g	draxin
Chr07	54004090	54004310	Xetrov90018264m.g	draxin
Chr03	32582726	32582958	Xetrov90007634m.g	drd1
Chr03	32586910	32587141	Xetrov90007634m.g	drd1
Chr03	32660552	32660727	Xetrov90007634m.g	drd1
Chr04	35775215	35775848	Xetrov90010939m.g	drd4
Chr09	23372208	23372707	Xetrov90023552m.g	drg2
Chr06	54219092	54219340	Xetrov90016194m.g	drosha
Chr06	54149591	54149754	Xetrov90016194m.g	drosha
Chr06	96623457	96623792	Xetrov90016745m.g	dsc3
Chr02	6987674	6987973	Xetrov90003994m.g	dscam
Chr07	84443585	84443806	Xetrov90018770m.g	dscaml1
Chr06	96653931	96654107	Xetrov90016746m.g	dsg1
Chr06	83222726	83222936	Xetrov90016546m.g	dsp
Chr06	83223650	83224112	Xetrov90016546m.g	dsp
Chr05	88895831	88896273	Xetrov90014281m.g	dst
Chr02	64176207	64176459	Xetrov90005063m.g	dstyk
Chr02	64181760	64182218	Xetrov90005063m.g	dstyk
Chr02	64142520	64142759	Xetrov90005063m.g	dstyk
scaffold_231	112631	113037	Xetrov90027345m.g	dtnb
Chr03	94457702	94457940	Xetrov90008801m.g	dtwd1
Chr01	162453615	162453803	Xetrov90003308m.g	dtwd2
Chr01	132631569	132631928	Xetrov90002688m.g	dtx1
Chr02	137571915	137572213	Xetrov90006338m.g	dtx3
Chr03	86046359	86046745	Xetrov90008678m.g	duox1
Chr05	6208226	6208459	Xetrov90013037m.g	dusp10
Chr05	6286870	6287161	Xetrov90013037m.g	dusp10
Chr07	17637519	17637936	Xetrov90017627m.g	dusp11.2
Chr07	17636985	17637342	Xetrov90017627m.g	dusp11.2
Chr03	113456639	113456829	Xetrov90009207m.g	dusp26
Chr01	78870727	78870900	Xetrov90001405m.g	dusp4
Chr01	78812131	78812325	Xetrov90001405m.g	dusp4
Chr01	78813750	78814410	Xetrov90001405m.g	dusp4
Chr01	78871658	78872006	Xetrov90001405m.g	dusp4
scaffold_401	106497	107035	Xetrov90028593m.g	dusp5
Chr03	45481454	45481731	Xetrov90007907m.g	dusp6
Chr04	118377208	118377470	Xetrov90012637m.g	dusp7
Chr04	55726324	55726549	Xetrov90011401m.g	dynlrb2
Chr02	65706634	65706899	Xetrov90005108m.g	dyrk3
Chr02	65713936	65714113	Xetrov90005108m.g	dyrk3
Chr02	65716989	65717217	Xetrov90005108m.g	dyrk3
Chr02	65730398	65730769	Xetrov90005108m.g	dyrk3
Chr01	9002380	9002774	Xetrov90000265m.g	dysf-like,dysf
Chr03	52128524	52128905	Xetrov90008069m.g	e2f7
Chr03	52124274	52124596	Xetrov90008069m.g	e2f7
scaffold_299	80020	80438	Xetrov90027906m.g	e2f8
scaffold_299	4309	4627	Xetrov90027906m.g	e2f8
scaffold_299	32808	33201	Xetrov90027906m.g	e2f8
scaffold_299	81787	82117	Xetrov90027906m.g	e2f8
scaffold_299	50149	50617	Xetrov90027906m.g	e2f8
Chr09	13525666	13526001	Xetrov90023249m.g	e4f1
Chr09	13527717	13528108	Xetrov90023249m.g	e4f1
Chr06	72705740	72705976	Xetrov90016393m.g	eaf1
Chr03	6951941	6952273	Xetrov90007172m.g	ebf1
Chr03	106434844	106435140	Xetrov90009004m.g	ebf2
Chr07	14064550	14064748	Xetrov90017592m.g	ebf3
Chr07	13977640	13978085	Xetrov90017592m.g	ebf3
Chr07	14104493	14104733	Xetrov90017592m.g	ebf3
Chr02	105654439	105654740	Xetrov90005803m.g	edar
Chr06	85373101	85373350	Xetrov90016581m.g	edn1
Chr06	85365393	85365645	Xetrov90016581m.g	edn1
Chr02	53144931	53145137	Xetrov90004839m.g	edn2
Chr02	53114414	53114622	Xetrov90004839m.g	edn2
Chr01	48368259	48368775	Xetrov90000928m.g	ednra
Chr05	92567337	92567519	Xetrov90014326m.g	eef1a1
Chr05	92560069	92560609	Xetrov90014326m.g	eef1a1
Chr05	92561800	92562193	Xetrov90014326m.g	eef1a1
Chr02	86685450	86685806	Xetrov90005480m.g	eef1a1o
Chr02	86676664	86678164	Xetrov90005480m.g	eef1a1o
Chr04	41505066	41505345	Xetrov90011162m.g	eef1g
Chr04	41520561	41521014	Xetrov90011162m.g	eef1g
Chr04	41514454	41514984	Xetrov90011162m.g	eef1g
Chr04	124705639	124706009	Xetrov90012739m.g	eefsec
Chr02	24390428	24390630	Xetrov90004227m.g	efcab5
Chr02	24366408	24366610	Xetrov90004227m.g	efcab5
Chr04	37826703	37827124	Xetrov90011016m.g	efemp2
Chr06	78587662	78588042	Xetrov90016464m.g	efhb
Chr05	123009580	123009942	Xetrov90014900m.g	efhd1
Chr05	123007771	123007955	Xetrov90014900m.g	efhd1
Chr01	136520110	136520426	Xetrov90002751m.g	efna5
Chr02	114966954	114967445	Xetrov90005973m.g	efnb2
Chr02	115018327	115018778	Xetrov90005973m.g	efnb2
Chr02	115084134	115084510	Xetrov90005973m.g	efnb2
Chr02	114962498	114962791	Xetrov90005973m.g	efnb2
Chr02	114963750	114964072	Xetrov90005973m.g	efnb2
Chr02	115062659	115063031	Xetrov90005973m.g	efnb2
Chr02	114965387	114966018	Xetrov90005973m.g	efnb2
Chr02	115086315	115086738	Xetrov90005973m.g	efnb2
Chr06	127451702	127451921	Xetrov90017191m.g	efr3a
Chr01	184671854	184672436	Xetrov90003656m.g	egflam
Chr06	65444379	65444923	Xetrov90016289m.g	egfr
Chr06	65409301	65409706	Xetrov90016289m.g	egfr
Chr06	65418476	65418724	Xetrov90016289m.g	egfr
Chr06	65410269	65410588	Xetrov90016289m.g	egfr
Chr08	93583868	93584196	Xetrov90021762m.g	egln3
Chr08	93459416	93459678	Xetrov90021762m.g	egln3
Chr08	93599423	93599805	Xetrov90021762m.g	egln3
Chr08	93437549	93437857	Xetrov90021762m.g	egln3
Chr08	93484874	93485299	Xetrov90021762m.g	egln3
Chr03	38806530	38806814	Xetrov90007781m.g	egr1
Chr03	119775980	119776261	Xetrov90009394m.g	egr3
Chr05	28317888	28318276	Xetrov90013340m.g	ehbp1
Chr04	38551213	38551573	Xetrov90011046m.g	ehd1
Chr04	38532617	38532790	Xetrov90011046m.g	ehd1
Chr06	116473826	116474056	Xetrov90017081m.g	eif3e
Chr08	59318258	59318484	Xetrov90021041m.g	eif3k
Chr02	144830620	144830924	Xetrov90006539m.g	eif4b
Chr04	129961331	129961612	Xetrov90012857m.g	eif4e3
Chr03	128468630	128468883	Xetrov90009749m.g	elavl3
Chr03	128437215	128437649	Xetrov90009749m.g	elavl3
Chr02	129028212	129028472	Xetrov90006115m.g	elf1
Chr04	112550542	112550717	Xetrov90012470m.g	elfn2
Chr01	172746036	172746353	Xetrov90003476m.g	ell2
Chr01	172785079	172785467	Xetrov90003476m.g	ell2
Chr01	172776181	172776513	Xetrov90003476m.g	ell2
Chr01	172773494	172773830	Xetrov90003476m.g	ell2
Chr10	14403954	14404275	Xetrov90025003m.g	elmo2
Chr05	114348441	114348705	Xetrov90014719m.g	elovl5
Chr01	176645707	176646061	Xetrov90003535m.g	elovl7
scaffold_63	523196	523371	Xetrov90029834m.g	elp3
Chr04	10011139	10011465	Xetrov90010395m.g	elp4
Chr01	132589399	132589755	Xetrov90002687m.g	emid1
Chr01	132570805	132571140	Xetrov90002687m.g	emid1
Chr01	132586667	132586998	Xetrov90002687m.g	emid1
Chr08	65031804	65032047	Xetrov90021186m.g	eml5
Chr09	31014263	31014473	Xetrov90023678m.g	emp2
Chr09	31007692	31008005	Xetrov90023678m.g	emp2
Chr01	10705257	10705557	Xetrov90000319m.g	emx1
Chr01	165913313	165913484	Xetrov90003374m.g	enc1
Chr01	166040832	166041193	Xetrov90003374m.g	enc1
Chr01	165985176	165985934	Xetrov90003374m.g	enc1
Chr01	165952863	165953067	Xetrov90003374m.g	enc1
Chr01	166073360	166073581	Xetrov90003374m.g	enc1
Chr01	165949401	165949747	Xetrov90003374m.g	enc1
Chr01	84248474	84248826	Xetrov90001577m.g	enc1.2
scaffold_163	209546	209916	Xetrov90026671m.g	eno4
Chr01	88647735	88648119	Xetrov90001724m.g	enoph1
Chr02	129973739	129974093	Xetrov90006133m.g	enox1
Chr02	129974423	129974887	Xetrov90006133m.g	enox1
Chr02	129970120	129970352	Xetrov90006133m.g	enox1
Chr06	122922029	122922307	Xetrov90017147m.g	enpp2
Chr06	122957694	122958732	Xetrov90017147m.g	enpp2
Chr06	122945852	122946105	Xetrov90017147m.g	enpp2
Chr10	18414136	18414486	Xetrov90025098m.g	enpp7
Chr06	72906750	72907003	Xetrov90016399m.g	entpd3
Chr05	49409682	49409986	Xetrov90013656m.g	entpd6
Chr05	49414038	49414319	Xetrov90013656m.g	entpd6
Chr05	49442469	49442708	Xetrov90013656m.g	entpd6
Chr07	27150766	27151024	Xetrov90017778m.g	entpd7
Chr06	116070222	116070366	Xetrov90017076m.g	eny2
Chr06	116066074	116066298	Xetrov90017076m.g	eny2
Chr06	75914701	75915358	Xetrov90016435m.g	eomes
Chr02	57785478	57785678	Xetrov90004940m.g	epb41
Chr09	71999516	71999750	Xetrov90024440m.g	epc2
Chr09	71997578	71997989	Xetrov90024440m.g	epc2
Chr09	72011023	72011353	Xetrov90024440m.g	epc2
Chr06	80825294	80825583	Xetrov90016488m.g	epdr1
Chr02	58426708	58427127	Xetrov90004955m.g	epha10
Chr02	17919230	17919576	Xetrov90004160m.g	epha3
Chr01	89469515	89469862	Xetrov90001745m.g	epha5
Chr01	89501852	89502253	Xetrov90001745m.g	epha5
Chr01	89487364	89487579	Xetrov90001745m.g	epha5
Chr05	84158806	84159194	Xetrov90014217m.g	epha7
Chr05	126990846	126991260	Xetrov90015037m.g	ephb1
Chr05	126939499	126939905	Xetrov90015037m.g	ephb1
Chr05	126947693	126948050	Xetrov90015037m.g	ephb1
Chr05	127015422	127015965	Xetrov90015037m.g	ephb1
Chr05	111713337	111713871	Xetrov90014689m.g	ephb3
Chr05	111653708	111653994	Xetrov90014689m.g	ephb3
Chr09	12620794	12621103	Xetrov90023203m.g	epn2
Chr09	12606139	12606343	Xetrov90023203m.g	epn2
Chr07	96577676	96578037	Xetrov90019027m.g	epn1
Chr07	96568506	96568845	Xetrov90019027m.g	epn1
Chr05	6961749	6962043	Xetrov90013050m.g	eprs1
Chr01	173078303	173078596	Xetrov90003486m.g	erap1
Chr01	174849248	174849491	Xetrov90003508m.g	erbin
Chr01	174858879	174859180	Xetrov90003508m.g	erbin
Chr01	174842854	174843119	Xetrov90003508m.g	erbin
Chr01	174818195	174818408	Xetrov90003508m.g	erbin
scaffold_98	103434	103738	Xetrov90030952m.g	erc1
scaffold_98	105386	105600	Xetrov90030952m.g	erc1
scaffold_98	113269	113549	Xetrov90030952m.g	erc1
scaffold_49	278477	278827	Xetrov90029073m.g	erc2
Chr07	61994086	61994408	Xetrov90018392m.g	ercc1
Chr08	49652533	49652836	Xetrov90020710m.g	ercc2
scaffold_33	1168667	1168855	Xetrov90028115m.g	ercc3
Chr07	99071185	99071683	Xetrov90019088m.g	erf
Chr07	99093953	99094350	Xetrov90019088m.g	erf
Chr07	99088556	99089076	Xetrov90019088m.g	erf
Chr04	82865248	82865778	Xetrov90011847m.g	eri3
Chr04	82832740	82833120	Xetrov90011847m.g	eri3
Chr01	114675441	114675724	Xetrov90002201m.g	ermp1
Chr09	15405012	15405330	Xetrov90023312m.g	ern2
Chr07	64470697	64471237	Xetrov90018415m.g	esam
Chr07	90947168	90947357	Xetrov90018895m.g	espn
Chr07	90944959	90945176	Xetrov90018895m.g	espn
Chr07	90974201	90974481	Xetrov90018896m.g	espn
Chr05	37676276	37676609	Xetrov90013457m.g	esr1
Chr07	91352203	91352432	Xetrov90018903m.g	hes5.5
Chr07	91351337	91351741	Xetrov90018903m.g	hes5.5
Chr07	91349616	91350125	Xetrov90018903m.g	hes5.5
Chr08	80911685	80911978	Xetrov90021500m.g	esr2
Chr08	80907680	80907956	Xetrov90021500m.g	esr2
Chr05	8757583	8758366	Xetrov90013064m.g	esrrg
Chr05	8802564	8802812	Xetrov90013064m.g	esrrg
Chr05	8713741	8714145	Xetrov90013064m.g	esrrg
Chr05	8715724	8716210	Xetrov90013064m.g	esrrg
Chr05	8790246	8790458	Xetrov90013064m.g	esrrg
Chr02	134360660	134360908	Xetrov90006244m.g	esyt1
Chr02	134332836	134333135	Xetrov90006244m.g	esyt1
Chr06	11330678	11330911	Xetrov90015613m.g	esyt2
Chr03	7915884	7916149	Xetrov90007200m.g	etf1
Chr02	7931153	7931632	Xetrov90004014m.g	ets2
Chr02	7893691	7894366	Xetrov90004014m.g	ets2
Chr02	7885974	7886633	Xetrov90004014m.g	ets2
Chr02	7873833	7874333	Xetrov90004014m.g	ets2
Chr02	7930454	7930727	Xetrov90004014m.g	ets2
Chr02	7890407	7891304	Xetrov90004014m.g	ets2
Chr02	7940118	7940600	Xetrov90004014m.g	ets2
Chr06	45649838	45650118	Xetrov90016062m.g	etv1
Chr06	45661016	45661337	Xetrov90016062m.g	etv1
Chr06	45673979	45674371	Xetrov90016062m.g	etv1
Chr06	45695194	45695568	Xetrov90016062m.g	etv1
Chr06	45555108	45555439	Xetrov90016062m.g	etv1
Chr06	45648962	45649223	Xetrov90016062m.g	etv1
Chr06	45656718	45657083	Xetrov90016062m.g	etv1
Chr06	45729502	45729768	Xetrov90016062m.g	etv1
Chr06	45684525	45684896	Xetrov90016062m.g	etv1
Chr06	45686972	45687189	Xetrov90016062m.g	etv1
Chr06	45709778	45710066	Xetrov90016062m.g	etv1
Chr06	32769755	32770145	Xetrov90015898m.g	evx1
Chr06	32812371	32812760	Xetrov90015898m.g	evx1
Chr06	32808410	32808770	Xetrov90015898m.g	evx1
Chr09	59881882	59882132	Xetrov90024216m.g	evx2
Chr06	38138695	38138900	Xetrov90015971m.g	exoc3
Chr03	76520145	76520486	Xetrov90008415m.g	exoc4
Chr03	76530214	76530425	Xetrov90008415m.g	exoc4
Chr07	17232558	17233039	Xetrov90017617m.g	exoc6
Chr07	17132069	17132783	Xetrov90017617m.g	exoc6
Chr07	17219239	17219768	Xetrov90017617m.g	exoc6
Chr06	122254573	122254865	Xetrov90017134m.g	ext1
Chr04	98951371	98951588	Xetrov90012169m.g	extl2
Chr06	105665339	105665687	Xetrov90016905m.g	eya1
Chr06	105651164	105651630	Xetrov90016905m.g	eya1
Chr06	105699022	105699374	Xetrov90016905m.g	eya1
Chr06	105655683	105656105	Xetrov90016905m.g	eya1
Chr06	105702646	105703022	Xetrov90016905m.g	eya1
Chr10	29204125	29204330	Xetrov90025285m.g	eya2
Chr10	29177333	29177925	Xetrov90025285m.g	eya2
Chr05	35501307	35501648	Xetrov90013430m.g	eya4
Chr03	36296618	36296834	Xetrov90007705m.g	f12
Chr03	36298083	36298470	Xetrov90007705m.g	f12
Chr01	165018503	165018722	Xetrov90003355m.g	f2r
Chr01	165113203	165113405	Xetrov90003357m.g	f2rl2
Chr04	26638418	26638691	Xetrov90010745m.g	fa2h
Chr04	26635018	26635197	Xetrov90010745m.g	fa2h
Chr04	6434014	6434221	Xetrov90010267m.g	fadd
Chr04	6445371	6445947	Xetrov90010267m.g	fadd
Chr04	85903925	85904239	Xetrov90011893m.g	faf1
Chr03	115625621	115626014	Xetrov90009220m.g	fah
Chr06	59793531	59793871	Xetrov90016226m.g	otulinl
Chr01	154645576	154645860	Xetrov90003174m.g	pheta1
Chr06	101321256	101321739	Xetrov90016830m.g	fam110b
Chr05	129681396	129681614	Xetrov90015073m.g	fam110c
Chr05	129682324	129683103	Xetrov90015073m.g	fam110c
Chr05	129665183	129665625	Xetrov90015073m.g	fam110c
Chr05	129729362	129729702	Xetrov90015073m.g	fam110c
Chr05	129679372	129679730	Xetrov90015073m.g	fam110c
Chr05	129707717	129707913	Xetrov90015073m.g	fam110c
Chr05	129708858	129709113	Xetrov90015073m.g	fam110c
Chr05	40008264	40008722	Xetrov90013507m.g	fam120b
Chr05	39993315	39993526	Xetrov90013507m.g	fam120b
Chr05	39954789	39955184	Xetrov90013507m.g	fam120b
Chr05	39971621	39971975	Xetrov90013507m.g	fam120b
Chr08	8397410	8397702	Xetrov90019952m.g	fam120c
Chr02	146989357	146989710	Xetrov90006604m.g	fam124a
Chr08	12070443	12070641	Xetrov90020039m.g	niban2
Chr08	12053340	12053882	Xetrov90020039m.g	niban2
Chr07	69586694	69586892	Xetrov90018509m.g	c1qtnf12
Chr07	69574194	69574617	Xetrov90018509m.g	c1qtnf12
Chr03	112164250	112164516	Xetrov90009178m.g	fam136a
Chr03	112109098	112109672	Xetrov90009178m.g	fam136a
Chr03	112149182	112149370	Xetrov90009178m.g	fam136a
Chr04	87493125	87493419	Xetrov90011943m.g	fam151a
Chr08	22276006	22276274	Xetrov90020281m.g	fam155b
Chr08	60772145	60772331	Xetrov90021094m.g	fam161b
Chr01	165743651	165743880	Xetrov90003369m.g	fam169a
Chr06	21391191	21391530	Xetrov90015750m.g	fam171a1
Chr06	21389546	21390186	Xetrov90015750m.g	fam171a1
Chr01	171884790	171885015	Xetrov90003459m.g	fam172a
Chr02	101550409	101550750	Xetrov90005741m.g	LOC100216245
Chr02	101551466	101551915	Xetrov90005741m.g	LOC100216245
Chr02	101555740	101555977	Xetrov90005741m.g	LOC100216245
Chr02	166377863	166378162	Xetrov90006954m.g	fam181b
Chr02	166380254	166380523	Xetrov90006954m.g	fam181b
Chr05	70900488	70900739	Xetrov90014023m.g	fam184a
Chr05	70883986	70884192	Xetrov90014023m.g	fam184a
Chr06	21613919	21614223	Xetrov90015753m.g	mindy3
Chr04	53834725	53835021	Xetrov90011348m.g	fam192a
Chr01	11961030	11961214	Xetrov90000375m.g	fam193a
Chr01	43973434	43973829	Xetrov90000858m.g	gask1b
Chr04	131666234	131666435	Xetrov90012882m.g	fam19a4
Chr01	144120938	144121412	Xetrov90002914m.g	lrrc75b
Chr04	115847524	115847782	Xetrov90012558m.g	inka1
Chr04	115876888	115877346	Xetrov90012558m.g	inka1
Chr04	115862809	115863015	Xetrov90012558m.g	inka1
Chr04	115876418	115876812	Xetrov90012558m.g	inka1
Chr07	94645677	94646190	Xetrov90018940m.g	prxl2b
Chr07	94663172	94663423	Xetrov90018940m.g	prxl2b
Chr03	91919846	91920312	Xetrov90008766m.g	fam214a
Chr03	91908791	91909294	Xetrov90008766m.g	fam214a
Chr03	91881165	91881473	Xetrov90008766m.g	fam214a
Chr10	774236	774512	Xetrov90024611m.g	fam217b
Chr10	766769	766990	Xetrov90024611m.g	fam217b
Chr10	770453	770796	Xetrov90024611m.g	fam217b
Chr10	772284	772518	Xetrov90024611m.g	fam217b
Chr01	138682570	138682947	Xetrov90002791m.g	fam222a
Chr01	138649789	138649996	Xetrov90002791m.g	fam222a
Chr01	138677756	138677972	Xetrov90002791m.g	fam222a
Chr01	138685762	138686003	Xetrov90002791m.g	fam222a
Chr01	138648820	138649118	Xetrov90002791m.g	fam222a
Chr02	26584835	26585176	Xetrov90004270m.g	fam222b
Chr05	141617923	141618275	Xetrov90015221m.g	fam228b
Chr01	13474368	13474766	Xetrov90000395m.g	fam53a
Chr01	13427839	13428277	Xetrov90000395m.g	fam53a
Chr04	89013237	89013532	Xetrov90011973m.g	brinp2
Chr02	45012143	45012614	Xetrov90004644m.g	pimreg
scaffold_21	1625770	1626026	Xetrov90027137m.g	dipk1c
Chr02	65448208	65448533	Xetrov90005101m.g	fam72a
Chr02	161403135	161403434	Xetrov90006875m.g	fam76b
Chr04	109042567	109042828	Xetrov90012360m.g	fam78b
Chr04	109028266	109028497	Xetrov90012360m.g	fam78b
Chr04	109066865	109067282	Xetrov90012360m.g	fam78b
Chr10	6186973	6187278	Xetrov90024783m.g	fam83c
Chr07	108768720	108769036	Xetrov90019364m.g	fam83e
Chr04	111249958	111250252	Xetrov90012418m.g	fam83f
Chr09	12745471	12745689	Xetrov90023208m.g	fam83g
scaffold_4151	7777	8147	Xetrov90028695m.g	fam83h
Chr06	48682859	48683167	Xetrov90016105m.g	fam8a1
Chr06	48668094	48668418	Xetrov90016105m.g	fam8a1
Chr07	16720762	16721029	Xetrov90017604m.g	fank1
Chr06	49979771	49980197	Xetrov90016121m.g	fars2
Chr01	34345448	34345993	Xetrov90000721m.g	fat1
Chr01	55732971	55733193	Xetrov90001026m.g	fat4
Chr01	55683447	55683605	Xetrov90001026m.g	fat4
Chr05	86135168	86135364	Xetrov90014231m.g	faxc
Chr05	86119890	86120190	Xetrov90014231m.g	faxc
Chr03	93941628	93941869	Xetrov90008791m.g	fbn1
Chr03	125667326	125667628	Xetrov90009650m.g	fbxl12
Chr03	125646701	125647148	Xetrov90009650m.g	fbxl12
Chr03	125634827	125635047	Xetrov90009650m.g	fbxl12
Chr03	125650066	125650413	Xetrov90009650m.g	fbxl12
Chr03	81790248	81790684	Xetrov90008544m.g	fbxl22
scaffold_21	1799139	1799423	Xetrov90027145m.g	fbxo15
Chr05	129646891	129647167	Xetrov90015072m.g	fbxo25
Chr05	129580645	129581230	Xetrov90015072m.g	fbxo25
Chr08	70026857	70027176	Xetrov90021293m.g	fbxo33
Chr08	84351397	84351833	Xetrov90021583m.g	fbxo34
Chr05	114245444	114245836	Xetrov90014716m.g	fbxo9
Chr01	46337929	46338239	Xetrov90000902m.g	fbxw7
Chr01	156182799	156183051	Xetrov90003199m.g	fbxw8
Chr01	156173016	156173196	Xetrov90003199m.g	fbxw8
Chr07	116585249	116585823	Xetrov90019633m.g	muc5acl
Chr01	166838920	166839150	Xetrov90003382m.g	fcho2
Chr06	43451612	43451835	Xetrov90016042m.g	ferd3l
Chr06	43480842	43481086	Xetrov90016042m.g	ferd3l
Chr05	21143862	21144086	Xetrov90013239m.g	fermt1
Chr08	73730974	73731508	Xetrov90021341m.g	fermt2
Chr08	73757412	73757716	Xetrov90021341m.g	fermt2
Chr08	73730011	73730300	Xetrov90021341m.g	fermt2
Chr05	98055498	98055984	Xetrov90014410m.g	fetub
Chr03	60360893	60361152	Xetrov90008174m.g	fezf1
Chr04	133391603	133391899	Xetrov90012896m.g	fezf2
Chr04	133386072	133386394	Xetrov90012896m.g	fezf2
Chr04	133260751	133261053	Xetrov90012896m.g	fezf2
Chr08	8210292	8210803	Xetrov90019947m.g	fgd1
Chr08	8217247	8217664	Xetrov90019947m.g	fgd1
Chr08	8222171	8222513	Xetrov90019947m.g	fgd1
Chr03	47366767	47366973	Xetrov90007950m.g	fgd6
Chr01	181589524	181589999	Xetrov90003606m.g	fgf10
Chr01	181703012	181703250	Xetrov90003606m.g	fgf10
Chr01	181602727	181603020	Xetrov90003606m.g	fgf10
Chr02	116596894	116597186	Xetrov90005992m.g	fgf14
Chr08	24405321	24405765	Xetrov90020342m.g	fgf16
Chr01	56511796	56512101	Xetrov90001034m.g	fgf2
Chr01	32888390	32888843	Xetrov90000697m.g	fgf20
Chr01	32903065	32903313	Xetrov90000697m.g	fgf20
Chr01	32898595	32898926	Xetrov90000697m.g	fgf20
Chr04	4807672	4807859	Xetrov90010207m.g	fgf3
Chr04	4867674	4868076	Xetrov90010208m.g	fgf4
Chr04	4862808	4863064	Xetrov90010208m.g	fgf4
Chr04	4830835	4831092	Xetrov90010208m.g	fgf4
Chr04	4842267	4842713	Xetrov90010208m.g	fgf4
Chr07	22683076	22683598	Xetrov90017721m.g	fgf8
Chr07	22734501	22734943	Xetrov90017721m.g	fgf8
Chr07	22714917	22715211	Xetrov90017721m.g	fgf8
Chr07	22781162	22781682	Xetrov90017721m.g	fgf8
Chr07	22711998	22712716	Xetrov90017721m.g	fgf8
Chr07	22715521	22715790	Xetrov90017721m.g	fgf8
Chr02	154445063	154445244	Xetrov90006750m.g	fgf9
Chr03	120665407	120665701	Xetrov90009427m.g	fgfr1
Chr03	120632121	120632430	Xetrov90009427m.g	fgfr1
Chr03	120649381	120649724	Xetrov90009427m.g	fgfr1
Chr07	10964077	10964385	Xetrov90017544m.g	fgfr2
Chr07	10933630	10933867	Xetrov90017544m.g	fgfr2
Chr07	10926157	10926600	Xetrov90017544m.g	fgfr2
Chr07	10923186	10923706	Xetrov90017544m.g	fgfr2
Chr07	10924625	10924952	Xetrov90017544m.g	fgfr2
Chr07	10940071	10940801	Xetrov90017544m.g	fgfr2
Chr07	10927140	10927929	Xetrov90017544m.g	fgfr2
Chr07	10934577	10935002	Xetrov90017544m.g	fgfr2
Chr07	10938499	10939341	Xetrov90017544m.g	fgfr2
Chr07	10946878	10947209	Xetrov90017544m.g	fgfr2
Chr01	12835039	12835365	Xetrov90000390m.g	fgfr3
Chr01	12886697	12887042	Xetrov90000390m.g	fgfr3
Chr01	12884936	12885184	Xetrov90000390m.g	fgfr3
Chr01	12785057	12785364	Xetrov90000390m.g	fgfr3
Chr01	12924895	12925146	Xetrov90000390m.g	fgfr3
Chr01	12888036	12888401	Xetrov90000390m.g	fgfr3
Chr03	36908269	36908638	Xetrov90007725m.g	fgfr4
Chr03	36889383	36889807	Xetrov90007725m.g	fgfr4
Chr03	36889993	36890265	Xetrov90007725m.g	fgfr4
Chr03	36912412	36912891	Xetrov90007725m.g	fgfr4
Chr03	36874722	36875185	Xetrov90007725m.g	fgfr4
Chr03	36890406	36890738	Xetrov90007725m.g	fgfr4
Chr03	36906195	36906678	Xetrov90007725m.g	fgfr4
Chr03	36884725	36885201	Xetrov90007725m.g	fgfr4
Chr01	14745132	14745441	Xetrov90000408m.g	fgfrl1
Chr01	33404225	33404685	Xetrov90000709m.g	fgl1
Chr01	33422321	33422549	Xetrov90000709m.g	fgl1
Chr01	46059859	46060144	Xetrov90000894m.g	fhdc1
Chr01	46051738	46052093	Xetrov90000894m.g	fhdc1
Chr08	47646015	47646259	Xetrov90020657m.g	fhl1
Chr08	47638819	47639287	Xetrov90020657m.g	fhl1
Chr08	47655733	47656356	Xetrov90020657m.g	fhl1
Chr02	58187807	58188023	Xetrov90004954m.g	fhl3
Chr02	58261423	58261641	Xetrov90004954m.g	fhl3
Chr02	58194608	58195014	Xetrov90004954m.g	fhl3
Chr04	26363650	26364151	Xetrov90010740m.g	fhod1
Chr09	66120735	66121261	Xetrov90024335m.g	fign
Chr05	141539693	141539887	Xetrov90015216m.g	fkbp1b
Chr08	111905554	111906002	Xetrov90022309m.g	fkbp9
Chr07	66637508	66637793	Xetrov90018439m.g	fli1
Chr07	66553015	66553184	Xetrov90018439m.g	fli1
scaffold_87	497320	497554	Xetrov90030780m.g	flnb
Chr08	63933290	63933607	Xetrov90021176m.g	flrt2
Chr02	132251717	132252159	Xetrov90006179m.g	fmnl3
Chr08	35703887	35704175	Xetrov90020485m.g	fmr1
Chr08	35679220	35679807	Xetrov90020485m.g	fmr1
Chr09	53753803	53754337	Xetrov90024074m.g	fn1
Chr09	53690156	53690610	Xetrov90024074m.g	fn1
Chr09	53739492	53739954	Xetrov90024074m.g	fn1
Chr09	53704190	53704583	Xetrov90024074m.g	fn1
Chr04	93962772	93963152	Xetrov90012056m.g	fnbp1l
Chr08	44549973	44550332	Xetrov90020606m.g	fndc3c
Chr08	44569513	44569777	Xetrov90020606m.g	fndc3c
Chr05	92927993	92928236	Xetrov90014340m.g	fndc3b
Chr01	43690592	43690868	Xetrov90000848m.g	fnip2
Chr02	164350220	164350479	Xetrov90006917m.g	folh1
Chr04	37880594	37880810	Xetrov90011019m.g	fosl1
Chr08	88731099	88731687	Xetrov90021679m.g	foxa1
Chr08	88815192	88815407	Xetrov90021679m.g	foxa1
Chr08	88824207	88824426	Xetrov90021679m.g	foxa1
Chr08	88814307	88814746	Xetrov90021679m.g	foxa1
Chr05	25796349	25797109	Xetrov90013306m.g	foxa2
Chr05	25809095	25809340	Xetrov90013306m.g	foxa2
Chr05	25801289	25801526	Xetrov90013306m.g	foxa2
Chr04	37213331	37213772	Xetrov90010996m.g	foxa4
Chr04	37224083	37224341	Xetrov90010996m.g	foxa4
Chr04	37238627	37239281	Xetrov90010996m.g	foxa4
Chr04	37211684	37211969	Xetrov90010996m.g	foxa4
Chr04	37208594	37208920	Xetrov90010996m.g	foxa4
Chr04	37206289	37206780	Xetrov90010996m.g	foxa4
Chr04	37228019	37228595	Xetrov90010996m.g	foxa4
Chr04	37235126	37235764	Xetrov90010996m.g	foxa4
Chr03	86521180	86521574	Xetrov90008680m.g	foxb1
Chr03	86631230	86631673	Xetrov90008680m.g	foxb1
Chr03	86525886	86526340	Xetrov90008680m.g	foxb1
Chr03	86585579	86585953	Xetrov90008680m.g	foxb1
Chr03	86535490	86535699	Xetrov90008680m.g	foxb1
Chr03	86530121	86530491	Xetrov90008680m.g	foxb1
Chr03	86623260	86623557	Xetrov90008680m.g	foxb1
Chr03	86624285	86624484	Xetrov90008680m.g	foxb1
Chr03	86529043	86529317	Xetrov90008680m.g	foxb1
Chr06	51755587	51755987	Xetrov90016156m.g	foxc1
Chr06	51751712	51752208	Xetrov90016156m.g	foxc1
Chr01	166621898	166622132	Xetrov90003379m.g	foxd1
Chr01	166536403	166536702	Xetrov90003379m.g	foxd1
Chr04	78406033	78406559	Xetrov90011768m.g	foxd3
Chr04	78331776	78332065	Xetrov90011768m.g	foxd3
Chr04	78414461	78414704	Xetrov90011768m.g	foxd3
Chr01	116841303	116841647	Xetrov90002244m.g	foxd4l1.1
Chr01	116834535	116834724	Xetrov90002244m.g	foxd4l1.1
Chr01	116842755	116843054	Xetrov90002244m.g	foxd4l1.1
Chr01	116837882	116838078	Xetrov90002244m.g	foxd4l1.1
Chr04	83872308	83872506	Xetrov90011874m.g	foxe3
Chr03	23287151	23287548	Xetrov90007506m.g	foxi1
Chr03	23284884	23285184	Xetrov90007506m.g	foxi1
Chr07	15768817	15769229	Xetrov90017599m.g	foxi2
Chr01	15310153	15310596	Xetrov90000422m.g	foxi4.1
Chr01	15326956	15327329	Xetrov90000422m.g	foxi4.1
Chr01	15338178	15338492	Xetrov90000423m.g	foxi4.2
Chr01	15333915	15334387	Xetrov90000423m.g	foxi4.2
Chr01	15349112	15349512	Xetrov90000423m.g	foxi4.2
Chr01	15329641	15329882	Xetrov90000423m.g	foxi4.2
Chr01	15361177	15361580	Xetrov90000423m.g	foxi4.2
Chr10	36490662	36490968	Xetrov90025580m.g	foxj1
Chr10	36488747	36489310	Xetrov90025580m.g	foxj1
Chr10	36501859	36502139	Xetrov90025580m.g	foxj1
Chr10	36510803	36511224	Xetrov90025580m.g	foxj1
Chr04	64182193	64182654	Xetrov90011534m.g	foxl1
Chr04	64110204	64110607	Xetrov90011534m.g	foxl1
Chr04	64062927	64063408	Xetrov90011534m.g	foxl1
Chr04	64041473	64041855	Xetrov90011534m.g	foxl1
Chr04	64022193	64022347	Xetrov90011534m.g	foxl1
Chr05	124821154	124821372	Xetrov90014958m.g	foxl2
Chr05	124821527	124821870	Xetrov90014958m.g	foxl2
Chr02	27151055	27151460	Xetrov90004290m.g	foxn1
Chr02	27158262	27158468	Xetrov90004290m.g	foxn1
Chr05	17230752	17230994	Xetrov90013178m.g	foxn2
Chr05	17218450	17218663	Xetrov90013178m.g	foxn2
Chr01	138236019	138236234	Xetrov90002781m.g	foxn4
Chr02	147528200	147528479	Xetrov90006624m.g	foxo1
Chr02	147531165	147531613	Xetrov90006624m.g	foxo1
Chr05	75372910	75373216	Xetrov90014079m.g	foxo3
Chr05	75394032	75394221	Xetrov90014079m.g	foxo3
Chr05	75496535	75496860	Xetrov90014079m.g	foxo3
Chr02	62839263	62839732	Xetrov90005031m.g	foxp4
Chr02	62733340	62733738	Xetrov90005031m.g	foxp4
Chr06	51611143	51611404	Xetrov90016154m.g	foxq1
Chr08	2367064	2367285	Xetrov90019755m.g	fpgs
Chr06	113075133	113075396	Xetrov90017026m.g	frat1
Chr01	33519786	33520135	Xetrov90000716m.g	frg1
Chr01	33521506	33521754	Xetrov90000716m.g	frg1
Chr05	72150334	72150768	Xetrov90014034m.g	frk
Chr01	121902564	121902781	Xetrov90002310m.g	frmd3
Chr03	72045405	72045595	Xetrov90008344m.g	frmd4a
Chr04	131247945	131248453	Xetrov90012868m.g	frmd4b
Chr04	38971371	38973209	Xetrov90011074m.g	frmd8
Chr04	38980230	38980524	Xetrov90011074m.g	frmd8
Chr02	102783641	102783946	Xetrov90005773m.g	frmpd4
Chr02	150423035	150423602	Xetrov90006683m.g	fry
Chr01	29871810	29872166	Xetrov90000653m.g	fryl
Chr09	56961333	56962016	Xetrov90024159m.g	frzb
Chr09	56965441	56965966	Xetrov90024159m.g	frzb
Chr09	56968494	56968885	Xetrov90024159m.g	frzb
Chr09	56958502	56958842	Xetrov90024159m.g	frzb
Chr04	126075838	126076304	Xetrov90012767m.g	frzb2
Chr04	126081592	126082158	Xetrov90012767m.g	frzb2
Chr06	112935103	112935442	Xetrov90017022m.g	fsbp
Chr01	179612090	179612286	Xetrov90003596m.g	fst
Chr01	179560259	179560707	Xetrov90003596m.g	fst
Chr01	42930987	42931423	Xetrov90000838m.g	fstl5
Chr01	42950768	42951263	Xetrov90000838m.g	fstl5
Chr08	5620741	5621016	Xetrov90019857m.g	fubp3
Chr08	5633856	5635868	Xetrov90019857m.g	fubp3
Chr07	106406511	106406907	Xetrov90019322m.g	fut1
Chr01	77833243	77833500	Xetrov90001394m.g	fut10
Chr01	77781627	77781838	Xetrov90001394m.g	fut10
Chr01	77832491	77832720	Xetrov90001394m.g	fut10
Chr01	77780661	77780836	Xetrov90001394m.g	fut10
Chr04	39402643	39402925	Xetrov90011082m.g	fut3
Chr08	99205477	99205922	Xetrov90021885m.g	fut8
Chr08	99242826	99243370	Xetrov90021885m.g	fut8
Chr08	99258418	99258848	Xetrov90021885m.g	fut8
Chr08	99238495	99238879	Xetrov90021885m.g	fut8
Chr05	95785242	95785612	Xetrov90014374m.g	fxr1
Chr07	84569309	84569554	Xetrov90018772m.g	fxyd2
Chr07	84554412	84554628	Xetrov90018772m.g	fxyd2
Chr01	149711733	149712124	Xetrov90003059m.g	fzd10
Chr01	149681869	149682234	Xetrov90003059m.g	fzd10
Chr01	149651205	149651415	Xetrov90003059m.g	fzd10
Chr01	149664820	149665330	Xetrov90003059m.g	fzd10
Chr10	9480267	9480825	Xetrov90024882m.g	fzd2
Chr10	9490785	9491037	Xetrov90024882m.g	fzd2
scaffold_63	451594	451852	Xetrov90029833m.g	fzd3
Chr02	165149692	165149946	Xetrov90006932m.g	fzd4
Chr02	165135658	165136094	Xetrov90006932m.g	fzd4
Chr02	165129170	165129683	Xetrov90006932m.g	fzd4
Chr09	41425596	41425764	Xetrov90023854m.g	fzd5
Chr09	41404140	41404791	Xetrov90023854m.g	fzd5
Chr06	118443607	118443974	Xetrov90017100m.g	fzd6
Chr06	118435510	118435713	Xetrov90017100m.g	fzd6
Chr09	47062980	47063488	Xetrov90023958m.g	fzd7
Chr09	47049011	47049241	Xetrov90023958m.g	fzd7
Chr09	47009009	47009879	Xetrov90023958m.g	fzd7
Chr09	47007400	47008170	Xetrov90023958m.g	fzd7
Chr09	47075496	47075986	Xetrov90023958m.g	fzd7
Chr09	47022216	47022597	Xetrov90023958m.g	fzd7
Chr09	47088197	47088526	Xetrov90023958m.g	fzd7
Chr09	47074651	47075382	Xetrov90023958m.g	fzd7
Chr09	47054189	47054440	Xetrov90023958m.g	fzd7
Chr09	47089823	47090628	Xetrov90023958m.g	fzd7
Chr09	47064104	47064431	Xetrov90023958m.g	fzd7
Chr06	13255364	13255722	Xetrov90015621m.g	fzd8
Chr06	13244740	13245004	Xetrov90015621m.g	fzd8
Chr06	13230462	13231108	Xetrov90015621m.g	fzd8
Chr06	13181145	13181748	Xetrov90015621m.g	fzd8
Chr06	13223088	13223283	Xetrov90015621m.g	fzd8
Chr06	13257898	13258353	Xetrov90015621m.g	fzd8
Chr06	13247794	13248473	Xetrov90015621m.g	fzd8
Chr06	13218530	13218911	Xetrov90015621m.g	fzd8
Chr06	13249921	13250429	Xetrov90015621m.g	fzd8
Chr02	46451569	46451994	Xetrov90004664m.g	g0s2
Chr07	10496288	10496528	Xetrov90017529m.g	gabarapl1
Chr06	60551065	60551384	Xetrov90016235m.g	gabbr2
Chr02	110419852	110420477	Xetrov90005902m.g	gabra5
Chr01	29056636	29056863	Xetrov90000636m.g	gabrb1
Chr01	29027295	29027479	Xetrov90000636m.g	gabrb1
Chr06	16986439	16986725	Xetrov90015674m.g	gad2
Chr04	80087082	80087464	Xetrov90011807m.g	gadd45a
Chr04	80100469	80100871	Xetrov90011807m.g	gadd45a
Chr04	80070155	80070538	Xetrov90011807m.g	gadd45a
Chr04	80085672	80086264	Xetrov90011807m.g	gadd45a
Chr04	80083568	80084069	Xetrov90011807m.g	gadd45a
Chr01	125858604	125858936	Xetrov90002379m.g	gadd45g
Chr01	125931357	125931767	Xetrov90002379m.g	gadd45g
Chr01	125903377	125903640	Xetrov90002379m.g	gadd45g
Chr01	125851702	125852673	Xetrov90002379m.g	gadd45g
Chr01	125855463	125855894	Xetrov90002379m.g	gadd45g
scaffold_48	428766	429129	Xetrov90029002m.g	gal3st4.1
Chr03	9120811	9121100	Xetrov90007219m.g	galnt10
Chr06	80160939	80161235	Xetrov90016474m.g	galnt15
Chr01	39612422	39612688	Xetrov90000787m.g	galnt7
Chr01	39616937	39617232	Xetrov90000787m.g	galnt7
Chr01	147798341	147798569	Xetrov90003038m.g	galnt9
Chr01	40016996	40017471	Xetrov90000789m.g	galntl6
scaffold_24	859949	860400	Xetrov90027444m.g	gars1
Chr01	122914536	122914722	Xetrov90002323m.g	gas1
Chr01	122894358	122894770	Xetrov90002323m.g	gas1
Chr02	89579261	89579575	Xetrov90005539m.g	gas2l2
Chr04	124972517	124972876	Xetrov90012741m.g	gata2
Chr03	74052905	74053318	Xetrov90008376m.g	gata3
Chr03	74059536	74059853	Xetrov90008376m.g	gata3
Chr03	74009879	74010214	Xetrov90008376m.g	gata3
Chr03	73862486	73862885	Xetrov90008376m.g	gata3
Chr03	74045554	74045791	Xetrov90008376m.g	gata3
Chr03	74062159	74062332	Xetrov90008376m.g	gata3
scaffold_13	774998	775685	Xetrov90026121m.g	gata4
scaffold_13	772349	772631	Xetrov90026121m.g	gata4
scaffold_13	758347	758652	Xetrov90026121m.g	gata4
scaffold_13	757673	757874	Xetrov90026121m.g	gata4
scaffold_13	706882	707135	Xetrov90026121m.g	gata4
scaffold_13	708421	708787	Xetrov90026121m.g	gata4
scaffold_13	782107	782545	Xetrov90026121m.g	gata4
scaffold_13	770820	771354	Xetrov90026121m.g	gata4
scaffold_473	88263	88779	Xetrov90028957m.g	gata5
Chr06	93702877	93703291	Xetrov90016691m.g	gata6
Chr06	93701439	93701719	Xetrov90016691m.g	gata6
Chr06	93698855	93699372	Xetrov90016691m.g	gata6
Chr06	93706283	93706865	Xetrov90016691m.g	gata6
Chr06	93698211	93698714	Xetrov90016691m.g	gata6
Chr06	93694275	93694733	Xetrov90016691m.g	gata6
Chr03	95145910	95146578	Xetrov90008826m.g	gatm
Chr02	96512606	96512774	Xetrov90005655m.g	castor2
Chr02	96513989	96514799	Xetrov90005655m.g	castor2
Chr02	20575278	20575631	Xetrov90004175m.g	gbe1
Chr02	20500777	20501189	Xetrov90004175m.g	gbe1
Chr02	19985802	19986066	Xetrov90004175m.g	gbe1
Chr09	54722267	54722436	Xetrov90024090m.g	gbx2.1
Chr09	54717170	54717358	Xetrov90024090m.g	gbx2.1
Chr09	54708392	54708651	Xetrov90024090m.g	gbx2.1
Chr09	54714240	54714499	Xetrov90024090m.g	gbx2.1
Chr09	54712563	54712895	Xetrov90024090m.g	gbx2.1
Chr09	54673578	54673896	Xetrov90024090m.g	gbx2.1
Chr09	54701100	54701583	Xetrov90024090m.g	gbx2.1
Chr09	54745993	54746636	Xetrov90024093m.g	gbx2.2
Chr09	54745138	54745536	Xetrov90024093m.g	gbx2.2
scaffold_51	1191894	1192242	Xetrov90029258m.g	gc
Chr08	74478748	74479057	Xetrov90021353m.g	gch1
Chr08	94887994	94888289	Xetrov90021808m.g	gchfr
Chr01	119723769	119724070	Xetrov90002287m.g	gcnt1
Chr06	84499277	84499753	Xetrov90016566m.g	gcnt2.2
Chr01	165712928	165713245	Xetrov90003368m.g	gcnt4
scaffold_113	258011	258294	Xetrov90025908m.g	gcnt7
scaffold_113	252462	252961	Xetrov90025908m.g	gcnt7
scaffold_113	256516	256748	Xetrov90025908m.g	gcnt7
Chr10	30315930	30316305	Xetrov90025326m.g	gdap1l1
Chr07	36391538	36391731	Xetrov90017979m.g	gdf10
Chr02	134811103	134811488	Xetrov90006261m.g	gdf11.2
Chr01	100373055	100373427	Xetrov90001964m.g	gdf3
Chr06	115144226	115144534	Xetrov90017059m.g	gdf6
Chr06	115147567	115147844	Xetrov90017059m.g	gdf6
Chr01	184498997	184499189	Xetrov90003655m.g	gdnf
Chr01	184571444	184571718	Xetrov90003655m.g	gdnf
Chr01	184501798	184502149	Xetrov90003655m.g	gdnf
Chr02	38605918	38606128	Xetrov90004513m.g	gdpd1
Chr08	23806656	23806946	Xetrov90020331m.g	gdpd2
Chr03	98300060	98300243	Xetrov90008898m.g	gdpgp1
Chr02	102092576	102092803	Xetrov90005756m.g	gemin8
Chr02	102084714	102084940	Xetrov90005756m.g	gemin8
Chr09	10392959	10393179	Xetrov90023141m.g	gfer
Chr09	10380385	10380863	Xetrov90023141m.g	gfer
Chr04	94295530	94295782	Xetrov90012071m.g	gfi1
Chr04	94284975	94285158	Xetrov90012071m.g	gfi1
Chr08	7145721	7145984	Xetrov90019900m.g	gfi1b
Chr05	103951077	103951300	Xetrov90014501m.g	gfm1
Chr03	111654918	111655390	Xetrov90009167m.g	gfpt1
Chr03	108646139	108646610	Xetrov90009101m.g	ggcx
Chr06	102983129	102983406	Xetrov90016853m.g	ggh
Chr01	144155374	144155905	Xetrov90002915m.g	ggt1
Chr01	144161522	144161803	Xetrov90002915m.g	ggt1
Chr01	144150709	144150996	Xetrov90002915m.g	ggt1
scaffold_1656	535	1072	Xetrov90026698m.g	gid8
Chr01	62774056	62774492	Xetrov90001147m.g	gimd1
Chr04	69914638	69914917	Xetrov90011618m.g	gipc2
Chr05	33937043	33937441	Xetrov90013412m.g	gja1
Chr02	4306882	4307200	Xetrov90003941m.g	gja8
Chr08	23160846	23161143	Xetrov90020307m.g	gjb1
Chr08	23162184	23162446	Xetrov90020307m.g	gjb1
Chr08	23174924	23175313	Xetrov90020307m.g	gjb1
Chr02	155793315	155793556	Xetrov90006787m.g	gjb2
Chr02	155810915	155811653	Xetrov90006787m.g	gjb2
Chr08	91587950	91588286	Xetrov90021736m.g	gjd2
Chr06	67270576	67270735	Xetrov90016306m.g	glb1l
Chr01	114526191	114526463	Xetrov90002193m.g	gldc
Chr01	114525408	114525789	Xetrov90002193m.g	gldc
Chr04	26814512	26814830	Xetrov90010749m.g	glg1
Chr02	137111993	137112434	Xetrov90006323m.g	gli1
Chr02	137128607	137129019	Xetrov90006323m.g	gli1
Chr02	137116250	137116580	Xetrov90006323m.g	gli1
Chr02	137109358	137110048	Xetrov90006323m.g	gli1
scaffold_498	46206	46411	Xetrov90029134m.g	gli2
Chr06	66259779	66260042	Xetrov90016302m.g	gli3
Chr01	38957420	38957675	Xetrov90000778m.g	glra3
Chr08	67789144	67789386	Xetrov90021266m.g	glrx5
Chr09	37338580	37338843	Xetrov90023782m.g	gls
Chr09	37304655	37304970	Xetrov90023782m.g	gls
Chr01	138836430	138836721	Xetrov90002794m.g	gltp
Chr04	90089893	90090109	Xetrov90011995m.g	glul-like.1
scaffold_312	180875	181340	Xetrov90027994m.g	glul
Chr06	51832070	51832677	Xetrov90016158m.g	gmds
Chr06	51818927	51819304	Xetrov90016158m.g	gmds
Chr06	51833885	51834287	Xetrov90016158m.g	gmds
Chr06	51947333	51947527	Xetrov90016158m.g	gmds
Chr05	99424843	99425441	Xetrov90014436m.g	gmnc
Chr05	99439621	99439891	Xetrov90014436m.g	gmnc
Chr06	28958605	28958861	Xetrov90015849m.g	gmnn
Chr06	28949179	28949568	Xetrov90015849m.g	gmnn
Chr06	28945300	28945872	Xetrov90015849m.g	gmnn
Chr01	102561305	102561502	Xetrov90002032m.g	gna11
Chr01	120163760	120164149	Xetrov90002294m.g	gna14
Chr03	69437269	69437542	Xetrov90008319m.g	gnai1
Chr04	116586580	116586815	Xetrov90012570m.g	gnai2
Chr02	63271211	63271503	Xetrov90005042m.g	gnai3
Chr06	88817543	88817745	Xetrov90016628m.g	gnal
Chr04	116396568	116396770	Xetrov90012567m.g	gnat1
Chr04	116388775	116388989	Xetrov90012567m.g	gnat1
Chr07	1333230	1333545	Xetrov90017390m.g	gnb3
Chr07	1333657	1334108	Xetrov90017390m.g	gnb3
Chr04	80125058	80125536	Xetrov90011810m.g	gng12
Chr04	80135747	80136129	Xetrov90011810m.g	gng12
Chr09	10504851	10505355	Xetrov90023148m.g	gng13
Chr08	75024307	75024453	Xetrov90021366m.g	gng2
Chr08	75045215	75045439	Xetrov90021366m.g	gng2
Chr08	75035228	75035588	Xetrov90021366m.g	gng2
Chr03	117722147	117722394	Xetrov90009300m.g	gnrhr2/nmi
Chr08	10457544	10457789	Xetrov90019990m.g	golga1
Chr01	122579623	122579863	Xetrov90002319m.g	golm1
Chr05	70094572	70094929	Xetrov90014011m.g	gopc
Chr09	62838176	62838446	Xetrov90024285m.g	gorasp2
Chr04	27511653	27511848	Xetrov90010768m.g	got2
Chr05	97202036	97202411	Xetrov90014393m.g	lrrc15
Chr08	46851422	46851933	Xetrov90020638m.g	gpc4
Chr08	46876260	46876539	Xetrov90020638m.g	gpc4
Chr08	46853727	46853977	Xetrov90020638m.g	gpc4
Chr08	46884703	46884860	Xetrov90020638m.g	gpc4
Chr08	46836929	46837373	Xetrov90020638m.g	gpc4
Chr08	46880019	46880308	Xetrov90020638m.g	gpc4
Chr08	46829509	46829718	Xetrov90020638m.g	gpc4
Chr08	46838339	46839044	Xetrov90020638m.g	gpc4
Chr02	119637177	119637445	Xetrov90006042m.g	gpc6
Chr02	145984396	145984787	Xetrov90006571m.g	gpd1
Chr02	145996590	145997346	Xetrov90006571m.g	gpd1
Chr06	74170543	74171142	Xetrov90016422m.g	gpd1l
Chr08	81229395	81229820	Xetrov90021509m.g	gphb5
Chr06	34838065	34838593	Xetrov90015946m.g	gpnmb
Chr09	48535597	48535863	Xetrov90023973m.g	gpr1
Chr08	48207311	48207577	Xetrov90020674m.g	gpr101
Chr02	152722782	152723064	Xetrov90006726m.g	gpr185a
Chr02	152721209	152721477	Xetrov90006726m.g	gpr185a
Chr02	152720366	152720607	Xetrov90006726m.g	gpr185a
Chr07	18821012	18821342	Xetrov90017644m.g	adgra1
Chr08	82732533	82732857	Xetrov90021533m.g	gpr135
Chr05	60278596	60278875	Xetrov90013830m.g	gpr137b
Chr05	105543672	105544152	Xetrov90014526m.g	gpr149
Chr07	90674084	90674293	Xetrov90018888m.g	gpr153
Chr07	90682774	90683263	Xetrov90018888m.g	gpr153
[truncated: 6,437 more rows]
