# Supplementary material for: Sox17 and β-catenin co-occupy Wnt-responsive enhancers to govern the endodermal gene regulatory network
Source: bioRxiv preprint, doi:10.1101/2020.02.19.956565, version 2 (2020-04-21)
Supplement: Supplemental_Table4_Bcat_ChIP_peaks [file 956565_file05.xlsx]

## Sheet: Sheet1
Chr	Start	Stop	XetrovID9.0	GeneSymbol9.1
Chr07	5029514	5029776	Xetrov90017461m.g	a1cf
Chr02	144280700	144280942	Xetrov90006520m.g	aaas
Chr02	144280112	144280614	Xetrov90006520m.g	aaas
Chr03	116720265	116720639	Xetrov90009271m.g	aagab
Chr03	116719058	116719446	Xetrov90009271m.g	aagab
Chr10	36699544	36699918	Xetrov90025594m.g	aanat
Chr10	36704338	36704891	Xetrov90025594m.g	aanat
Chr02	49970875	49971372	Xetrov90004736m.g	aatf
Chr02	50011649	50012235	Xetrov90004736m.g	aatf
Chr02	49933470	49933739	Xetrov90004736m.g	aatf
Chr02	50013261	50014023	Xetrov90004736m.g	aatf
Chr10	18709372	18709737	Xetrov90025103m.g	aatk
Chr08	483805	484380	Xetrov90019677m.g	abca2
Chr09	15770933	15771197	Xetrov90023339m.g	abca3
Chr09	15767256	15767517	Xetrov90023339m.g	abca3
Chr04	93563787	93564250	Xetrov90012050m.g	abca4
Chr04	93536932	93537213	Xetrov90012050m.g	abca4
Chr06	21150337	21150642	Xetrov90015744m.g	abcb1
Chr06	21223969	21224225	Xetrov90015744m.g	abcb1
Chr06	42951417	42951765	Xetrov90016035m.g	abcb5
Chr06	42950331	42950735	Xetrov90016035m.g	abcb5
Chr06	42946666	42947236	Xetrov90016035m.g	abcb5
Chr02	119114964	119115402	Xetrov90006035m.g	abcc4
Chr02	119047276	119048176	Xetrov90006035m.g	abcc4
Chr02	119074429	119074846	Xetrov90006035m.g	abcc4
Chr02	119051483	119052060	Xetrov90006035m.g	abcc4
Chr05	110771205	110771464	Xetrov90014653m.g	abcc5
Chr02	38166778	38167209	Xetrov90004502m.g	abhd11
Chr02	38144899	38145282	Xetrov90004502m.g	abhd11
Chr02	38163644	38163881	Xetrov90004502m.g	abhd11
Chr05	49189369	49189722	Xetrov90013650m.g	abhd12
Chr01	128936700	128937065	Xetrov90002510m.g	abhd4
Chr06	73431399	73431819	Xetrov90016407m.g	abhd5
scaffold_87	396762	397040	Xetrov90030777m.g	abhd6
Chr06	16684076	16684625	Xetrov90015665m.g	abi1
Chr04	89721672	89721951	Xetrov90011984m.g	abl2
scaffold_124	129528	130113	Xetrov90026021m.g	abo.3
scaffold_124	97622	97941	Xetrov90026021m.g	abo.3
Chr02	24768178	24768486	Xetrov90004236m.g	abr
Chr02	24767519	24767765	Xetrov90004236m.g	abr
Chr06	117038766	117039073	Xetrov90017085m.g	abra
Chr06	117059788	117060250	Xetrov90017085m.g	abra
Chr06	117160002	117160248	Xetrov90017085m.g	abra
Chr06	117152939	117153770	Xetrov90017085m.g	abra
Chr04	7118895	7119288	Xetrov90010285m.g	abtb2
Chr04	7114126	7114401	Xetrov90010285m.g	abtb2
Chr01	138164548	138164779	Xetrov90002780m.g	acacb
Chr01	138154162	138154462	Xetrov90002780m.g	acacb
Chr01	138161189	138161508	Xetrov90002780m.g	acacb
Chr01	143375873	143376157	Xetrov90002874m.g	acads
Chr07	11849542	11849992	Xetrov90017559m.g	acadsb
Chr05	4408128	4408725	Xetrov90012983m.g	acbd3
Chr05	4407455	4407955	Xetrov90012983m.g	acbd3
Chr05	4411964	4412303	Xetrov90012983m.g	acbd3
Chr01	83022496	83022919	Xetrov90001543m.g	acer1
Chr01	83017544	83018036	Xetrov90001543m.g	acer1
Chr01	83023126	83023464	Xetrov90001543m.g	acer1
Chr02	168575589	168576115	Xetrov90006989m.g	acer3
Chr09	54953413	54954088	Xetrov90024096m.g	ackr3
Chr09	54955637	54956185	Xetrov90024096m.g	ackr3
Chr09	54958749	54959301	Xetrov90024096m.g	ackr3
Chr09	54946963	54947335	Xetrov90024096m.g	ackr3
Chr09	79129894	79131232	Xetrov90024556m.g	acmsd
Chr03	81445178	81445508	Xetrov90008537m.g	acsbg1
Chr01	82933183	82933568	Xetrov90001538m.g	acsbg2
Chr04	61061213	61061569	Xetrov90011454m.g	acsf3
Chr04	61065492	61065866	Xetrov90011454m.g	acsf3
Chr01	35490899	35491441	Xetrov90000747m.g	acsl1
Chr05	121722080	121722472	Xetrov90014832m.g	acsl3
Chr05	121713727	121714143	Xetrov90014832m.g	acsl3
Chr03	43138055	43138435	Xetrov90007875m.g	acss3
Chr03	43120781	43121211	Xetrov90007875m.g	acss3
Chr05	61439322	61439824	Xetrov90013863m.g	acta1
Chr07	4489273	4489921	Xetrov90017443m.g	acta2
Chr08	91508984	91509352	Xetrov90021735m.g	actc1
Chr08	91480632	91481155	Xetrov90021735m.g	actc1
Chr08	91471598	91472004	Xetrov90021735m.g	actc1
Chr08	91489081	91489415	Xetrov90021735m.g	actc1
Chr08	89384768	89385154	Xetrov90021700m.g	actn1
Chr08	89401333	89401743	Xetrov90021700m.g	actn1
Chr04	36857373	36857754	Xetrov90010979m.g	actn3
Chr09	68828584	68828907	Xetrov90024381m.g	acvr1
Chr09	68833181	68833844	Xetrov90024381m.g	acvr1
Chr09	68831497	68832004	Xetrov90024381m.g	acvr1
Chr02	131841497	131842011	Xetrov90006172m.g	acvr1b
Chr02	131840529	131841066	Xetrov90006172m.g	acvr1b
Chr02	131870829	131871155	Xetrov90006172m.g	acvr1b
Chr02	131853955	131854212	Xetrov90006172m.g	acvr1b
Chr09	72116706	72117176	Xetrov90024444m.g	acvr2a
Chr09	72320730	72321057	Xetrov90024444m.g	acvr2a
Chr09	72408898	72409198	Xetrov90024444m.g	acvr2a
Chr09	72204650	72204890	Xetrov90024444m.g	acvr2a
Chr06	6219316	6219645	Xetrov90015558m.g	acvr2b
Chr06	6214804	6215112	Xetrov90015558m.g	acvr2b
Chr02	89815787	89816415	Xetrov90005547m.g	acy3
Chr05	133928123	133928450	Xetrov90015125m.g	adam17
Chr09	48623728	48623990	Xetrov90023975m.g	adam23
Chr01	10058869	10059511	Xetrov90000295m.g	adam33
Chr01	10064938	10065291	Xetrov90000295m.g	adam33
Chr01	10023777	10024314	Xetrov90000295m.g	adam33
Chr01	10062154	10062747	Xetrov90000295m.g	adam33
Chr03	106738099	106738623	Xetrov90009012m.g	adam28.1
Chr02	13984916	13985244	Xetrov90004125m.g	adamts1
Chr01	83184633	83185011	Xetrov90001550m.g	adamts10
Chr07	47118455	47118664	Xetrov90018179m.g	adamts15
Chr07	47112151	47112484	Xetrov90018179m.g	adamts15
Chr04	57727482	57727895	Xetrov90011414m.g	adamts18
Chr04	57360955	57361213	Xetrov90011414m.g	adamts18
Chr04	57279879	57280387	Xetrov90011414m.g	adamts18
Chr04	57301898	57302254	Xetrov90011414m.g	adamts18
Chr04	57277182	57277741	Xetrov90011414m.g	adamts18
Chr04	57275284	57275794	Xetrov90011414m.g	adamts18
Chr04	57281973	57282354	Xetrov90011414m.g	adamts18
Chr01	158871355	158871746	Xetrov90003256m.g	adamts19
scaffold_51	705513	705805	Xetrov90029255m.g	adamts3
Chr02	13812989	13813459	Xetrov90004124m.g	adamts5
Chr02	13802462	13802909	Xetrov90004124m.g	adamts5
Chr02	13764512	13765036	Xetrov90004124m.g	adamts5
Chr01	175166444	175166799	Xetrov90003517m.g	adamts6
Chr01	175142053	175142310	Xetrov90003517m.g	adamts6
Chr03	116061354	116061735	Xetrov90009244m.g	adamts7
Chr03	116074799	116075110	Xetrov90009244m.g	adamts7
Chr03	95852486	95852821	Xetrov90008843m.g	adamtsl3
Chr08	106862337	106862688	Xetrov90022160m.g	adamtsl4
Chr08	106855756	106856236	Xetrov90022160m.g	adamtsl4
Chr08	106853341	106853774	Xetrov90022160m.g	adamtsl4
Chr03	97685812	97686253	Xetrov90008880m.g	adamtsl5
Chr03	97701224	97701630	Xetrov90008880m.g	adamtsl5
Chr04	112281090	112281384	Xetrov90012459m.g	adap1l
Chr04	112279251	112279604	Xetrov90012459m.g	adap1l
Chr02	132542823	132543082	Xetrov90006189m.g	adcy6
Chr04	46495330	46495599	Xetrov90011262m.g	adcy7
scaffold_24	209424	209948	Xetrov90027428m.g	adcyap1r1
Chr06	24777291	24777650	Xetrov90015798m.g	add3
Chr01	94972086	94972396	Xetrov90001835m.g	adh6
Chr05	124010337	124010572	Xetrov90014937m.g	adipoq
Chr07	57844640	57844899	Xetrov90018323m.g	adk
Chr01	85472346	85472898	Xetrov90001605m.g	admp
Chr01	85481550	85482183	Xetrov90001605m.g	admp
Chr01	85488043	85488347	Xetrov90001605m.g	admp
Chr07	37395626	37396168	Xetrov90017999m.g	admp2
Chr07	37403008	37403607	Xetrov90017999m.g	admp2
Chr07	9564240	9564568	Xetrov90017507m.g	ado
Chr07	9610195	9610518	Xetrov90017507m.g	ado
Chr07	9579385	9579834	Xetrov90017507m.g	ado
Chr07	9616701	9616981	Xetrov90017507m.g	ado
Chr01	144034041	144034583	Xetrov90002910m.g	adora2a
Chr09	51299508	51299812	Xetrov90024042m.g	adprh
Chr03	109265402	109265852	Xetrov90009134m.g	adra2b
Chr03	31147573	31148007	Xetrov90007611m.g	adrb2
Chr03	31318868	31319219	Xetrov90007611m.g	adrb2
Chr01	139416605	139416989	Xetrov90002806m.g	grk3
Chr06	85133098	85133446	Xetrov90016578m.g	adtrp
Chr06	85137440	85137813	Xetrov90016578m.g	adtrp
Chr03	100028260	100028588	Xetrov90008942m.g	aen
Chr03	100146956	100147391	Xetrov90008942m.g	aen
Chr01	102411691	102412023	Xetrov90002031m.g	tle5
Chr01	102446174	102446790	Xetrov90002031m.g	tle5
Chr01	102445809	102446109	Xetrov90002031m.g	tle5
Chr01	102431363	102431655	Xetrov90002031m.g	tle5
Chr01	19768468	19768711	Xetrov90000509m.g	afap1
Chr03	31681945	31682243	Xetrov90007618m.g	afap1l1
Chr03	31667756	31667986	Xetrov90007618m.g	afap1l1
Chr08	36062220	36062638	Xetrov90020486m.g	aff2,aff2-like.1
Chr08	35953474	35953760	Xetrov90020486m.g	aff2,aff2-like.1
Chr02	108914160	108914407	Xetrov90005869m.g	aff3
Chr01	37978144	37978427	Xetrov90000769m.g	aga
Chr01	37525869	37526216	Xetrov90000769m.g	aga
Chr09	54539953	54540404	Xetrov90024088m.g	agap1
Chr09	54575365	54575745	Xetrov90024089m.g	agap1
Chr09	54625363	54625667	Xetrov90024089m.g	agap1
Chr09	54578221	54578613	Xetrov90024089m.g	agap1
Chr09	54620662	54621143	Xetrov90024089m.g	agap1
Chr03	101502553	101502883	Xetrov90008951m.g	agbl1
Chr05	125375839	125376131	Xetrov90014976m.g	agfg1
Chr05	125395412	125395677	Xetrov90014976m.g	agfg1
Chr01	164831364	164832079	Xetrov90003351m.g	aggf1
scaffold_283	100875	101259	Xetrov90027802m.g	agk
Chr04	98443232	98443521	Xetrov90012151m.g	agl
Chr06	45170115	45170398	Xetrov90016058m.g	agmo
Chr02	56052514	56052880	Xetrov90004905m.g	ago1
Chr06	130382463	130382975	Xetrov90017225m.g	ago2
Chr02	55992245	55992830	Xetrov90004904m.g	ago3
Chr06	44544651	44545129	Xetrov90016048m.g	agr2
Chr06	44497978	44498253	Xetrov90016047m.g	agr3
Chr07	79268692	79269236	Xetrov90018697m.g	agrn
Chr05	118673285	118673660	Xetrov90014782m.g	agtr1
Chr02	52352618	52353087	Xetrov90004808m.g	ahdc1
Chr02	52341660	52341967	Xetrov90004808m.g	ahdc1
Chr02	52340942	52341236	Xetrov90004808m.g	ahdc1
Chr04	41450038	41450475	Xetrov90011161m.g	ahnak
Chr04	41461238	41461665	Xetrov90011161m.g	ahnak
Chr04	41438465	41438987	Xetrov90011161m.g	ahnak
Chr04	41458260	41458826	Xetrov90011161m.g	ahnak
Chr04	41464293	41464662	Xetrov90011161m.g	ahnak
Chr04	41455609	41456062	Xetrov90011161m.g	ahnak
Chr04	41441654	41442237	Xetrov90011161m.g	ahnak
Chr04	41489095	41489417	Xetrov90011161m.g	ahnak
Chr05	98028000	98028678	Xetrov90014409m.g	ahsg
Chr07	51162821	51163124	Xetrov90018216m.g	aifm2
Chr07	51164679	51165143	Xetrov90018216m.g	aifm2
Chr02	40221520	40221826	Xetrov90004556m.g	aifm3-like
Chr05	76368776	76369281	Xetrov90014097m.g	crybg1
Chr05	76332164	76332454	Xetrov90014097m.g	crybg1
Chr02	51642158	51642569	Xetrov90004785m.g	crybg2
Chr01	62809594	62809950	Xetrov90001150m.g	aimp1
scaffold_27	205211	205490	Xetrov90027658m.g	aip
scaffold_27	122192	122661	Xetrov90027658m.g	aip
scaffold_27	133798	134270	Xetrov90027658m.g	aip
scaffold_27	203774	204154	Xetrov90027658m.g	aip
scaffold_27	174064	174363	Xetrov90027658m.g	aip
Chr01	115072008	115072228	Xetrov90002210m.g	ak3
Chr01	115074984	115075331	Xetrov90002210m.g	ak3
Chr08	7077879	7078263	Xetrov90019896m.g	ak8
Chr02	100968447	100968790	Xetrov90005718m.g	akap1
Chr03	101756403	101756830	Xetrov90008953m.g	akap13
Chr01	96332450	96332787	Xetrov90001873m.g	palm2akap2
Chr01	96337004	96337353	Xetrov90001873m.g	palm2akap2
Chr01	96351166	96351479	Xetrov90001873m.g	palm2akap2
Chr01	96341297	96341660	Xetrov90001873m.g	palm2akap2
Chr01	96343413	96343895	Xetrov90001873m.g	palm2akap2
Chr06	23286901	23287231	Xetrov90015769m.g	akap9
Chr02	54779069	54779370	Xetrov90004870m.g	akirin1
Chr04	102064394	102064895	Xetrov90012212m.g	aknad1
Chr04	102085513	102085925	Xetrov90012212m.g	aknad1
Chr04	25769334	25770049	Xetrov90010725m.g	aktip
Chr04	118430376	118430686	Xetrov90012641m.g	alas1
Chr02	99367740	99368089	Xetrov90005700m.g	alcam
Chr02	99363615	99364387	Xetrov90005700m.g	alcam
Chr02	99359467	99359805	Xetrov90005700m.g	alcam
Chr02	99341588	99342010	Xetrov90005700m.g	alcam
Chr07	104885830	104886202	Xetrov90019270m.g	aldh16a1
Chr07	16923326	16923693	Xetrov90017613m.g	aldh18a1
Chr03	89741077	89741574	Xetrov90008734m.g	aldh1a2
Chr03	89678659	89679147	Xetrov90008734m.g	aldh1a2
Chr03	89668771	89669833	Xetrov90008734m.g	aldh1a2
Chr03	89664536	89664830	Xetrov90008734m.g	aldh1a2
Chr03	89740533	89740819	Xetrov90008734m.g	aldh1a2
Chr03	89662328	89663131	Xetrov90008734m.g	aldh1a2
Chr03	89742443	89743043	Xetrov90008734m.g	aldh1a2
Chr03	89735045	89735619	Xetrov90008734m.g	aldh1a2
Chr03	105657071	105657748	Xetrov90008992m.g	aldh1a3
Chr03	105659601	105660080	Xetrov90008992m.g	aldh1a3
Chr04	122763365	122763753	Xetrov90012718m.g	aldh1l1
Chr04	122789773	122790254	Xetrov90012718m.g	aldh1l1
Chr04	122760464	122760838	Xetrov90012718m.g	aldh1l1
Chr01	159906063	159906404	Xetrov90003273m.g	aldh7a1
Chr01	159866751	159867091	Xetrov90003273m.g	aldh7a1
Chr03	65203279	65203685	Xetrov90008240m.g	alg10
Chr03	63029343	63029662	Xetrov90008218m.g	alg12
Chr05	111097754	111098008	Xetrov90014667m.g	alg3
Chr05	111087559	111087816	Xetrov90014667m.g	alg3
Chr05	2449735	2449962	Xetrov90012940m.g	alk
Chr08	85214626	85214949	Xetrov90021604m.g	ltk
Chr09	10278931	10279220	Xetrov90023139m.g	alkbh5
Chr08	59364048	59364456	Xetrov90021044m.g	alkbh6
Chr01	10328853	10329241	Xetrov90000309m.g	alms1
Chr02	151174463	151174759	Xetrov90006700m.g	alox5ap
Chr03	81193313	81193784	Xetrov90008531m.g	alpk3
Chr03	44322300	44322632	Xetrov90007884m.g	alx1
Chr03	44320526	44321181	Xetrov90007884m.g	alx1
Chr03	44295734	44296108	Xetrov90007884m.g	alx1
Chr03	44281675	44281947	Xetrov90007884m.g	alx1
Chr04	3754164	3754497	Xetrov90010179m.g	alx4
Chr02	103162631	103163253	Xetrov90005777m.g	amelx
Chr02	103163739	103164156	Xetrov90005777m.g	amelx
Chr02	103206065	103206544	Xetrov90005777m.g	amelx
Chr02	103159595	103160019	Xetrov90005777m.g	amelx
Chr02	103172401	103172667	Xetrov90005777m.g	amelx
Chr08	25346481	25346811	Xetrov90020384m.g	amer1
Chr08	25346937	25347416	Xetrov90020384m.g	amer1
Chr02	153428274	153428700	Xetrov90006739m.g	amer2
Chr02	144116347	144116691	Xetrov90006516m.g	amhr2
Chr08	30216079	30216336	Xetrov90020436m.g	ammecr1
Chr08	30188014	30188291	Xetrov90020436m.g	ammecr1
Chr08	30181346	30181652	Xetrov90020436m.g	ammecr1
Chr08	31068933	31069231	Xetrov90020454m.g	amot
Chr05	126757693	126758124	Xetrov90015030m.g	amotl2
Chr05	126711046	126711281	Xetrov90015030m.g	amotl2
Chr05	126728218	126728482	Xetrov90015030m.g	amotl2
Chr05	126747592	126747989	Xetrov90015030m.g	amotl2
Chr05	126742867	126743940	Xetrov90015030m.g	amotl2
Chr05	126761088	126761834	Xetrov90015030m.g	amotl2
Chr05	126726797	126727230	Xetrov90015030m.g	amotl2
scaffold_203	338994	339552	Xetrov90027049m.g	ampd3
Chr04	99940461	99940685	Xetrov90012182m.g	amy2a
Chr01	49662584	49662864	Xetrov90000950m.g	anapc10
Chr01	153803919	153804306	Xetrov90003146m.g	anapc5
Chr06	116874261	116874537	Xetrov90017084m.g	angpt1
Chr06	116834383	116834646	Xetrov90017084m.g	angpt1
Chr06	116897963	116898252	Xetrov90017084m.g	angpt1
Chr06	116906743	116907086	Xetrov90017084m.g	angpt1
Chr03	46727872	46728247	Xetrov90007933m.g	angpt4
Chr01	82410460	82410933	Xetrov90001519m.g	angptl4
Chr07	39851004	39851394	Xetrov90018042m.g	angptl7
Chr07	39897537	39897857	Xetrov90018042m.g	angptl7
Chr03	22400373	22400974	Xetrov90007487m.g	ankhd1
Chr07	72785468	72785886	Xetrov90018564m.g	ankk1
Chr01	147011223	147011891	Xetrov90003030m.g	ankle2
Chr04	61315883	61316209	Xetrov90011458m.g	ankrd11
Chr07	4517046	4517330	Xetrov90017446m.g	ankrd22
Chr06	80296758	80297036	Xetrov90016476m.g	ankrd28
Chr01	172104469	172104841	Xetrov90003464m.g	slf1
Chr08	116885474	116885893	Xetrov90022468m.g	ankrd35
Chr08	116876914	116877667	Xetrov90022468m.g	ankrd35
Chr01	178372784	178373122	Xetrov90003565m.g	ankrd55
Chr05	83083473	83083736	Xetrov90014204m.g	ankrd6
Chr07	70201579	70201981	Xetrov90018530m.g	ankrd65
Chr07	70141996	70142718	Xetrov90018530m.g	ankrd65
Chr08	76759402	76759927	Xetrov90021403m.g	ankrd9
Chr08	76766518	76766903	Xetrov90021403m.g	ankrd9
Chr08	76797886	76798770	Xetrov90021403m.g	ankrd9
Chr08	76761761	76762274	Xetrov90021403m.g	ankrd9
Chr02	77553654	77553986	Xetrov90005314m.g	anks1a
Chr09	18893508	18893753	Xetrov90023422m.g	anks4b
Chr06	81257305	81257542	Xetrov90016493m.g	anln
Chr06	81241062	81241327	Xetrov90016493m.g	anln
Chr03	8480845	8481197	Xetrov90007208m.g	ano2
scaffold_203	367621	367960	Xetrov90027051m.g	ano5
Chr01	76326825	76327434	Xetrov90001371m.g	antxr2
Chr01	76220502	76220807	Xetrov90001371m.g	antxr2
Chr01	76294230	76294590	Xetrov90001371m.g	antxr2
Chr07	41759216	41759466	Xetrov90018066m.g	anxa11
Chr03	83862769	83863128	Xetrov90008604m.g	anxa2
Chr03	111796026	111796497	Xetrov90009171m.g	anxa4
Chr03	111808680	111809059	Xetrov90009171m.g	anxa4
Chr03	111809885	111810294	Xetrov90009171m.g	anxa4
Chr07	31330355	31330575	Xetrov90017881m.g	anxa7
Chr01	118628125	118628566	Xetrov90002275m.g	anxa1.3
Chr01	118822702	118822967	Xetrov90002275m.g	anxa1.3
Chr01	118780572	118780983	Xetrov90002275m.g	anxa1.3
Chr06	81118010	81118305	Xetrov90016492m.g	aoah
Chr07	110022064	110022343	Xetrov90019402m.g	ap2a1
Chr08	92962111	92962412	Xetrov90021751m.g	ap4s1
Chr03	38829723	38829979	Xetrov90007782m.g	apaf1
Chr03	87452216	87452517	Xetrov90008696m.g	apba2
Chr01	27609795	27610102	Xetrov90000610m.g	apbb2
Chr01	27605239	27605657	Xetrov90000610m.g	apbb2
Chr06	89608005	89608338	Xetrov90016641m.g	apcdd1
Chr06	89690773	89691182	Xetrov90016641m.g	apcdd1
Chr06	89698133	89698515	Xetrov90016641m.g	apcdd1
Chr04	3008409	3009144	Xetrov90010157m.g	api5
Chr08	31219183	31220024	Xetrov90020458m.g	apln
Chr08	31220415	31220735	Xetrov90020458m.g	apln
Chr08	31210461	31211134	Xetrov90020458m.g	apln
Chr01	131408797	131409097	Xetrov90002641m.g	aplnr
Chr01	131381297	131381842	Xetrov90002641m.g	aplnr
Chr01	131358167	131358700	Xetrov90002641m.g	aplnr
Chr01	131404407	131404885	Xetrov90002641m.g	aplnr
Chr01	131394948	131395354	Xetrov90002641m.g	aplnr
Chr01	131382813	131383083	Xetrov90002641m.g	aplnr
Chr01	131389513	131390265	Xetrov90002641m.g	aplnr
Chr02	48777148	48777442	Xetrov90004706m.g	apobec2
Chr08	42063386	42063660	Xetrov90020560m.g	apool
scaffold_87	161940	162306	Xetrov90030767m.g	appl1
Chr04	60901422	60901894	Xetrov90011444m.g	aprt
Chr02	167342695	167343026	Xetrov90006968m.g	aqp11
Chr02	167352014	167352311	Xetrov90006968m.g	aqp11
Chr01	24565693	24566447	Xetrov90000560m.g	arap2
Chr03	19304970	19305793	Xetrov90007465m.g	arap3
Chr03	19316625	19316932	Xetrov90007465m.g	arap3
Chr10	8799661	8800104	Xetrov90024854m.g	arf1
Chr06	1982199	1982613	Xetrov90015462m.g	arf5
scaffold_2620	2099	2650	Xetrov90027612m.g	arfgap1
scaffold_2620	2742	3481	Xetrov90027612m.g	arfgap1
Chr06	104505852	104506266	Xetrov90016887m.g	arfgef1
Chr10	29784818	29785231	Xetrov90025305m.g	arfgef2
Chr10	29778759	29779169	Xetrov90025305m.g	arfgef2
Chr02	114846689	114847156	Xetrov90005972m.g	arglu1
Chr02	114844622	114844897	Xetrov90005972m.g	arglu1
Chr02	114814433	114814747	Xetrov90005972m.g	arglu1
Chr02	114792019	114792590	Xetrov90005972m.g	arglu1
Chr02	114783245	114783588	Xetrov90005972m.g	arglu1
Chr02	114810028	114810398	Xetrov90005972m.g	arglu1
Chr02	114751872	114752200	Xetrov90005972m.g	arglu1
Chr02	114788176	114788421	Xetrov90005972m.g	arglu1
Chr02	114865415	114865932	Xetrov90005972m.g	arglu1
Chr02	114817181	114817767	Xetrov90005972m.g	arglu1
Chr08	90419913	90420229	Xetrov90021722m.g	arhgap11a.1
Chr06	14820159	14820547	Xetrov90015640m.g	arhgap12
Chr06	17545119	17545508	Xetrov90015682m.g	arhgap21
Chr07	36775952	36776251	Xetrov90017984m.g	arhgap22
Chr07	36803946	36804246	Xetrov90017984m.g	arhgap22
Chr10	4065611	4065917	Xetrov90024727m.g	arhgap23
Chr10	4085784	4086418	Xetrov90024727m.g	arhgap23
Chr01	93360471	93360882	Xetrov90001810m.g	arhgap24
Chr10	29568356	29568825	Xetrov90025295m.g	arhgap27
Chr04	93453680	93454006	Xetrov90012049m.g	arhgap29
Chr04	93483878	93484275	Xetrov90012049m.g	arhgap29
Chr04	93451760	93452199	Xetrov90012049m.g	arhgap29
Chr02	2374533	2374873	Xetrov90003903m.g	arhgap31
Chr07	67036690	67037579	Xetrov90018447m.g	arhgap32
Chr10	19903865	19904187	Xetrov90025137m.g	arhgdia
Chr10	19904676	19905032	Xetrov90025137m.g	arhgdia
Chr07	98431968	98432294	Xetrov90019076m.g	arhgef1
Chr07	98423513	98423824	Xetrov90019076m.g	arhgef1
Chr07	98441080	98441713	Xetrov90019076m.g	arhgef1
Chr07	98432656	98433150	Xetrov90019076m.g	arhgef1
Chr08	110534740	110535179	Xetrov90022268m.g	arhgef11
Chr01	84132992	84133367	Xetrov90001576m.g	LOC100498370,arhgef18[provLOC100498531]
Chr01	166354372	166354795	Xetrov90003375m.g	arhgef28
scaffold_49	86634	87389	Xetrov90029070m.g	arhgef3.2
scaffold_49	97135	97573	Xetrov90029070m.g	arhgef3.2
scaffold_49	99074	99388	Xetrov90029070m.g	arhgef3.2
scaffold_49	70854	71339	Xetrov90029070m.g	arhgef3.2
scaffold_49	99956	100494	Xetrov90029070m.g	arhgef3.2
scaffold_49	72604	73153	Xetrov90029070m.g	arhgef3.2
Chr01	63104719	63105020	Xetrov90001160m.g	arhgef38
Chr01	63132581	63133564	Xetrov90001160m.g	arhgef38
Chr08	48076331	48076685	Xetrov90020669m.g	arhgef6
Chr08	48098946	48099198	Xetrov90020669m.g	arhgef6
Chr08	48085488	48085804	Xetrov90020669m.g	arhgef6
Chr02	113467266	113467504	Xetrov90005955m.g	arhgef7
Chr02	51909573	51909972	Xetrov90004792m.g	arid1a
Chr02	51910162	51910528	Xetrov90004792m.g	arid1a
Chr02	51918071	51918337	Xetrov90004792m.g	arid1a
Chr05	41564458	41564856	Xetrov90013540m.g	arid1b
Chr05	41433883	41434273	Xetrov90013540m.g	arid1b
Chr03	54413252	54413740	Xetrov90008093m.g	arid2
Chr03	54432083	54432429	Xetrov90008093m.g	arid2
Chr03	54369545	54370283	Xetrov90008093m.g	arid2
Chr03	54448278	54448626	Xetrov90008093m.g	arid2
Chr03	54430293	54430754	Xetrov90008093m.g	arid2
Chr03	54428854	54429089	Xetrov90008093m.g	arid2
Chr03	54427653	54428578	Xetrov90008093m.g	arid2
Chr01	81571223	81571794	Xetrov90001481m.g	arid3a
Chr01	81561347	81561715	Xetrov90001481m.g	arid3a
Chr01	81595783	81596213	Xetrov90001481m.g	arid3a
Chr01	81556170	81556515	Xetrov90001481m.g	arid3a
Chr01	81568560	81568948	Xetrov90001481m.g	arid3a
Chr01	81553578	81553877	Xetrov90001481m.g	arid3a
Chr01	81569162	81569622	Xetrov90001481m.g	arid3a
Chr01	81561961	81562340	Xetrov90001481m.g	arid3a
Chr01	81586319	81586583	Xetrov90001481m.g	arid3a
Chr03	84789591	84789994	Xetrov90008626m.g	arid3b
Chr03	84781786	84782042	Xetrov90008626m.g	arid3b
Chr03	84811014	84811330	Xetrov90008626m.g	arid3b
Chr08	83285147	83285414	Xetrov90021544m.g	arid4a
Chr08	83316290	83316586	Xetrov90021544m.g	arid4a
Chr08	83314861	83315095	Xetrov90021544m.g	arid4a
Chr07	9849229	9849495	Xetrov90017510m.g	arid5b
Chr08	17465046	17465449	Xetrov90020175m.g	arl13a
Chr02	17665035	17665484	Xetrov90004155m.g	arl13b
Chr06	46038704	46038996	Xetrov90016064m.g	arl4a
Chr06	45940702	45941096	Xetrov90016064m.g	arl4a
Chr06	45985070	45985399	Xetrov90016064m.g	arl4a
Chr06	46040391	46040885	Xetrov90016064m.g	arl4a
Chr06	45950141	45950520	Xetrov90016064m.g	arl4a
Chr06	46003302	46003642	Xetrov90016064m.g	arl4a
Chr06	45943639	45944406	Xetrov90016064m.g	arl4a
Chr06	46009919	46010393	Xetrov90016064m.g	arl4a
Chr06	45947373	45947741	Xetrov90016064m.g	arl4a
Chr06	45987454	45988007	Xetrov90016064m.g	arl4a
Chr06	45931061	45931405	Xetrov90016064m.g	arl4a
Chr06	45981264	45981673	Xetrov90016064m.g	arl4a
Chr06	46001059	46001452	Xetrov90016064m.g	arl4a
Chr06	46039830	46040277	Xetrov90016064m.g	arl4a
Chr06	46016305	46016646	Xetrov90016064m.g	arl4a
Chr06	46001830	46002172	Xetrov90016064m.g	arl4a
Chr09	54272663	54273250	Xetrov90024084m.g	arl4c
Chr09	54282849	54283192	Xetrov90024084m.g	arl4c
Chr09	54301073	54301452	Xetrov90024084m.g	arl4c
Chr09	54277832	54278206	Xetrov90024084m.g	arl4c
Chr09	54283609	54284153	Xetrov90024084m.g	arl4c
Chr09	54286098	54286629	Xetrov90024084m.g	arl4c
Chr09	54258121	54258529	Xetrov90024084m.g	arl4c
Chr09	54271331	54271668	Xetrov90024084m.g	arl4c
Chr09	54266572	54266934	Xetrov90024084m.g	arl4c
Chr09	54276848	54277153	Xetrov90024084m.g	arl4c
Chr09	54260769	54261095	Xetrov90024084m.g	arl4c
Chr09	54250154	54250605	Xetrov90024084m.g	arl4c
Chr10	3544060	3544631	Xetrov90024707m.g	arl5c
Chr10	3546650	3547293	Xetrov90024707m.g	arl5c
Chr10	3537794	3538462	Xetrov90024707m.g	arl5c
Chr10	3536308	3536817	Xetrov90024707m.g	arl5c
Chr10	3550264	3550583	Xetrov90024707m.g	arl5c
Chr01	152751765	152752064	Xetrov90003103m.g	arl6ip4
Chr09	70575220	70575479	Xetrov90024396m.g	arl6ip6
Chr09	50956246	50956878	Xetrov90024039m.g	armc8
Chr03	99013980	99014289	Xetrov90008916m.g	arnt2
Chr03	98604463	98604880	Xetrov90008903m.g	arpin
Chr01	171105724	171106026	Xetrov90003456m.g	arrdc3
Chr01	171094630	171095001	Xetrov90003456m.g	arrdc3
Chr01	171103345	171103720	Xetrov90003456m.g	arrdc3
Chr01	171096202	171096696	Xetrov90003456m.g	arrdc3
Chr03	104391281	104391991	Xetrov90008972m.g	arrdc4
Chr03	104397845	104398360	Xetrov90008972m.g	arrdc4
Chr03	104424583	104425059	Xetrov90008972m.g	arrdc4
Chr01	164091699	164092004	Xetrov90003340m.g	arsb
scaffold_443	6420	6743	Xetrov90028834m.g	arsg
scaffold_174	363680	364789	Xetrov90026758m.g	art5
Chr01	146565813	146566151	Xetrov90003019m.g	arvcf
Chr02	36386685	36387206	Xetrov90004449m.g	arx
Chr02	36403535	36404097	Xetrov90004449m.g	arx
Chr05	133813905	133814254	Xetrov90015120m.g	asap2
Chr02	33019684	33020067	Xetrov90004411m.g	asb9
Chr07	35116154	35116671	Xetrov90017949m.g	ascc1
Chr07	35113003	35113415	Xetrov90017949m.g	ascc1
Chr03	40167584	40168209	Xetrov90007817m.g	ascl1
Chr03	40095706	40095977	Xetrov90007817m.g	ascl1
Chr03	40096997	40097369	Xetrov90007817m.g	ascl1
Chr03	123576132	123576416	Xetrov90009547m.g	asgr1
Chr03	121806891	121807210	Xetrov90009496m.g	ash2l
Chr03	121808822	121809284	Xetrov90009496m.g	ash2l
Chr02	145767567	145767911	Xetrov90006568m.g	asic1
Chr10	8295368	8295678	Xetrov90024846m.g	asic2
Chr10	8463799	8464061	Xetrov90024847m.g	asic2
scaffold_73	1306711	1307025	Xetrov90030198m.g	asns
Chr09	39419020	39419453	Xetrov90023818m.g	asnsd1
Chr06	102627572	102627960	Xetrov90016850m.g	asph
Chr04	113662744	113663063	Xetrov90012504m.g	aspn
Chr08	5584814	5585094	Xetrov90019856m.g	ass1
Chr06	97510992	97511333	Xetrov90016768m.g	asxl3
Chr06	97504037	97504415	Xetrov90016768m.g	asxl3
Chr05	141340011	141340324	Xetrov90015211m.g	atad2b
Chr05	141377257	141377527	Xetrov90015211m.g	atad2b
Chr05	141381363	141381678	Xetrov90015211m.g	atad2b
Chr05	10689877	10690379	Xetrov90013088m.g	atf3
Chr07	95467534	95467842	Xetrov90018987m.g	atf5
Chr04	108434824	108435282	Xetrov90012341m.g	atf6
Chr04	108454611	108455220	Xetrov90012341m.g	atf6
Chr04	108471770	108472070	Xetrov90012341m.g	atf6
Chr04	104646333	104646817	Xetrov90012259m.g	atf7ip
Chr04	104644269	104644562	Xetrov90012259m.g	atf7ip
Chr05	123280428	123280963	Xetrov90014907m.g	atg16l1
Chr04	78281493	78281947	Xetrov90011767m.g	atg4c
Chr04	78232196	78232549	Xetrov90011767m.g	atg4c
Chr04	78291892	78292344	Xetrov90011767m.g	atg4c
Chr05	39146233	39146561	Xetrov90013492m.g	atl2
Chr01	67479899	67480483	Xetrov90001222m.g	atoh1
Chr01	67476661	67477240	Xetrov90001222m.g	atoh1
Chr01	67560119	67560578	Xetrov90001222m.g	atoh1
Chr03	14524435	14524948	Xetrov90007308m.g	atp10b
Chr05	19669594	19669906	Xetrov90013200m.g	atp12a-like
Chr05	19682018	19682758	Xetrov90013200m.g	atp12a-like
Chr05	19690671	19690985	Xetrov90013200m.g	atp12a-like
Chr05	19686253	19686645	Xetrov90013200m.g	atp12a-like
scaffold_633	4353	4660	Xetrov90029850m.g	atp1a1
scaffold_633	34480	35068	Xetrov90029850m.g	atp1a1
scaffold_633	6404	7255	Xetrov90029850m.g	atp1a1
scaffold_633	32300	33233	Xetrov90029850m.g	atp1a1
Chr02	68525747	68526076	Xetrov90005165m.g	atp1b1
Chr02	68506520	68506871	Xetrov90005165m.g	atp1b1
scaffold_393	27191	27535	Xetrov90028535m.g	atp1b2
Chr05	125954049	125954378	Xetrov90015003m.g	atp1b3
Chr05	125978962	125979346	Xetrov90015003m.g	atp1b3
Chr05	125985110	125985513	Xetrov90015003m.g	atp1b3
Chr01	154029711	154030018	Xetrov90003155m.g	atp2a2
Chr01	154041948	154042735	Xetrov90003155m.g	atp2a2
Chr01	154081288	154081590	Xetrov90003155m.g	atp2a2
Chr01	154030336	154030970	Xetrov90003155m.g	atp2a2
Chr04	114142252	114142676	Xetrov90012511m.g	atp2b4
Chr08	3657625	3658025	Xetrov90019789m.g	atp2b3
Chr08	3590140	3590495	Xetrov90019789m.g	atp2b3
Chr08	3588997	3589419	Xetrov90019789m.g	atp2b3
Chr02	143813838	143814271	Xetrov90006503m.g	atp5mc1
Chr10	35734341	35734573	Xetrov90025525m.g	atp5pd
Chr08	71915423	71915737	Xetrov90021311m.g	dmac2l
Chr08	71917152	71917489	Xetrov90021311m.g	dmac2l
Chr01	168278651	168279144	Xetrov90003425m.g	atp6ap1l
Chr01	168255923	168256238	Xetrov90003425m.g	atp6ap1l
Chr02	70219385	70219719	Xetrov90005202m.g	atp6ap2
scaffold_113	557104	557405	Xetrov90025919m.g	atp6v0a1
scaffold_113	560825	561175	Xetrov90025919m.g	atp6v0a1
Chr04	82190290	82190613	Xetrov90011838m.g	atp6v0b
Chr09	15985936	15986274	Xetrov90023358m.g	atp6v0c
Chr06	110538636	110539016	Xetrov90016981m.g	atp6v0d2
Chr06	110540926	110541222	Xetrov90016981m.g	atp6v0d2
Chr03	34020605	34020937	Xetrov90007651m.g	atp6v0e1
Chr06	118556960	118557202	Xetrov90017102m.g	atp6v1c1
Chr06	99920663	99921020	Xetrov90016795m.g	atp6v1h
Chr01	28290489	28291183	Xetrov90000624m.g	atp8a1
Chr01	188747726	188747984	Xetrov90003729m.g	atp8b1
scaffold_650	12229	13254	Xetrov90029900m.g	atp8b2[provLOC100490503]
Chr02	57065790	57066079	Xetrov90004928m.g	atp5if1
Chr02	57073396	57073649	Xetrov90004928m.g	atp5if1
Chr05	116311350	116311582	Xetrov90014762m.g	atr
Chr08	24528587	24528840	Xetrov90020343m.g	atrx
Chr01	154469344	154469695	Xetrov90003171m.g	atxn2
Chr03	67435725	67436001	Xetrov90008283m.g	atxn7l1
Chr03	67436058	67436367	Xetrov90008283m.g	atxn7l1
Chr03	67415300	67415602	Xetrov90008283m.g	atxn7l1
Chr01	126447296	126447672	Xetrov90002383m.g	auh
Chr01	126438969	126439283	Xetrov90002383m.g	auh
Chr02	50863694	50863957	Xetrov90004751m.g	aunip
Chr02	96067775	96068030	Xetrov90005647m.g	auts2
Chr02	96066503	96066826	Xetrov90005647m.g	auts2
Chr08	89814799	89815041	Xetrov90021714m.g	aven
Chr07	24896411	24896703	Xetrov90017755m.g	avpi1
Chr08	12451414	12451807	Xetrov90020052m.g	avpr2
Chr09	9337390	9337878	Xetrov90023104m.g	axin1
scaffold_715	24887	25364	Xetrov90030148m.g	axin2
scaffold_715	28591	28884	Xetrov90030148m.g	axin2
Chr06	118649826	118650380	Xetrov90017104m.g	azin1
Chr06	118649312	118649627	Xetrov90017104m.g	azin1
Chr02	86272016	86272304	Xetrov90005467m.g	azin2
Chr09	64439973	64440449	Xetrov90024322m.g	b3galt1
Chr09	64438851	64439414	Xetrov90024322m.g	b3galt1
Chr03	127771981	127772290	Xetrov90009715m.g	b3galt2
Chr02	2235719	2236136	Xetrov90003902m.g	b3gat1l
Chr05	28082017	28082537	Xetrov90013333m.g	b3gnt2
Chr05	28050958	28051424	Xetrov90013333m.g	b3gnt2
Chr05	28057185	28057466	Xetrov90013333m.g	b3gnt2
Chr05	110264071	110264379	Xetrov90014637m.g	b3gnt7
Chr02	137998390	137998922	Xetrov90006344m.g	b4galnt1
Chr02	2197269	2197590	Xetrov90003901m.g	b4galt3l1
scaffold_171	153838	154258	Xetrov90026722m.g	b4galt3l2
scaffold_171	199399	200200	Xetrov90026722m.g	b4galt3l2
scaffold_171	223965	224640	Xetrov90026722m.g	b4galt3l2
scaffold_171	219911	220401	Xetrov90026722m.g	b4galt3l2
scaffold_171	203105	203552	Xetrov90026722m.g	b4galt3l2
scaffold_171	90681	91044	Xetrov90026722m.g	b4galt3l2
Chr10	28454509	28454986	Xetrov90025274m.g	b4galt5
Chr10	28410491	28410957	Xetrov90025274m.g	b4galt5
Chr10	28459874	28460206	Xetrov90025274m.g	b4galt5
Chr06	118506901	118507238	Xetrov90017101m.g	baalc
Chr05	49267940	49268758	Xetrov90013652m.g	baf-l
Chr05	49276472	49276744	Xetrov90013652m.g	baf-l
Chr10	20456039	20456366	Xetrov90025156m.g	bahcc1
Chr08	94481364	94481940	Xetrov90021795m.g	bahd1
Chr08	94431772	94432246	Xetrov90021795m.g	bahd1
Chr02	83095874	83096195	Xetrov90005407m.g	adgrb2
Chr05	90401269	90401808	Xetrov90014303m.g	adgrb3
Chr05	90462379	90462757	Xetrov90014303m.g	adgrb3
Chr09	20259008	20259453	Xetrov90023481m.g	baiap2l1
Chr09	20220085	20220778	Xetrov90023481m.g	baiap2l1
Chr09	20245651	20246142	Xetrov90023481m.g	baiap2l1
Chr02	78777589	78777895	Xetrov90005330m.g	bak1
Chr06	15900996	15901317	Xetrov90015649m.g	bambi
Chr06	15883405	15884003	Xetrov90015649m.g	bambi
Chr06	15910487	15911079	Xetrov90015649m.g	bambi
Chr06	15882365	15882639	Xetrov90015649m.g	bambi
Chr06	15903968	15904470	Xetrov90015649m.g	bambi
Chr06	15901821	15902767	Xetrov90015649m.g	bambi
Chr06	15885487	15885970	Xetrov90015649m.g	bambi
Chr06	15887926	15888527	Xetrov90015649m.g	bambi
Chr04	95118394	95118721	Xetrov90012085m.g	barhl2
Chr04	95053473	95053730	Xetrov90012085m.g	barhl2
scaffold_403	946	1329	Xetrov90028595m.g	barx1
Chr06	58808263	58808629	Xetrov90016209m.g	basp1
Chr06	58804041	58804404	Xetrov90016209m.g	basp1
Chr02	135481396	135481742	Xetrov90006283m.g	baz2a
Chr09	68181765	68182556	Xetrov90024368m.g	baz2b
Chr01	57425306	57425567	Xetrov90001061m.g	bbs7
Chr06	25902747	25903076	Xetrov90015808m.g	bbs9
Chr06	25936177	25936833	Xetrov90015808m.g	bbs9
Chr07	101299257	101299777	Xetrov90019153m.g	bcam
Chr04	51358657	51359078	Xetrov90011317m.g	bcar1
Chr04	51322905	51324116	Xetrov90011317m.g	bcar1
scaffold_707	18552	18780	Xetrov90030088m.g	bcat1
Chr08	69500839	69501303	Xetrov90021280m.g	bcl11b
Chr05	50380168	50380455	Xetrov90013669m.g	bcl2l11
Chr05	50487294	50488163	Xetrov90013669m.g	bcl2l11
scaffold_41	399071	399399	Xetrov90028650m.g	bcl2l13
Chr02	70591340	70591741	Xetrov90005205m.g	bcor
Chr02	70603197	70603611	Xetrov90005205m.g	bcor
Chr02	70618758	70619249	Xetrov90005205m.g	bcor
Chr02	70731393	70731723	Xetrov90005205m.g	bcor
Chr02	70569881	70570162	Xetrov90005205m.g	bcor
Chr02	70588312	70588929	Xetrov90005205m.g	bcor
Chr02	70617958	70618291	Xetrov90005205m.g	bcor
Chr02	70622926	70623367	Xetrov90005205m.g	bcor
Chr02	70642366	70642897	Xetrov90005205m.g	bcor
Chr02	70637308	70637631	Xetrov90005205m.g	bcor
Chr02	70644862	70645331	Xetrov90005205m.g	bcor
Chr02	70624962	70625547	Xetrov90005205m.g	bcor
Chr02	70677609	70677941	Xetrov90005205m.g	bcor
Chr02	70621945	70622305	Xetrov90005205m.g	bcor
Chr02	70699507	70700109	Xetrov90005205m.g	bcor
Chr01	64082601	64082908	Xetrov90001171m.g	bdh2
Chr05	76073094	76073521	Xetrov90014089m.g	bend3
Chr04	84889317	84889716	Xetrov90011881m.g	bend5
Chr04	84966339	84966648	Xetrov90011881m.g	bend5
Chr04	84878441	84878725	Xetrov90011881m.g	bend5
Chr09	31921136	31921398	Xetrov90023695m.g	bfar
Chr05	31357671	31357987	Xetrov90013385m.g	bfsp1
Chr08	3757530	3757754	Xetrov90019790m.g	bgn
scaffold_400	116116	116511	Xetrov90028589m.g	bicd1
scaffold_192	308476	309177	Xetrov90026931m.g	bicd2
Chr02	159030404	159030731	Xetrov90006849m.g	birc2
Chr02	159022958	159023630	Xetrov90006849m.g	birc2
Chr03	12196860	12197221	Xetrov90007271m.g	LOC105946782
Chr03	115833421	115833817	Xetrov90009226m.g	blm
Chr07	17775258	17775644	Xetrov90017631m.g	blnk
Chr08	50178028	50178304	Xetrov90020728m.g	bloc1s3
Chr06	18538871	18539266	Xetrov90015697m.g	bmi1
Chr05	21302605	21302905	Xetrov90013240m.g	bmp2
Chr05	21300655	21301062	Xetrov90013240m.g	bmp2
Chr05	21294957	21295322	Xetrov90013240m.g	bmp2
Chr01	76904149	76904429	Xetrov90001376m.g	bmp3
Chr08	74099903	74100381	Xetrov90021344m.g	bmp4
Chr08	74092342	74093111	Xetrov90021344m.g	bmp4
Chr08	74088432	74088815	Xetrov90021344m.g	bmp4
Chr08	74093661	74094733	Xetrov90021344m.g	bmp4
Chr08	74091207	74091801	Xetrov90021344m.g	bmp4
Chr08	74087823	74088229	Xetrov90021344m.g	bmp4
Chr08	74114488	74114825	Xetrov90021344m.g	bmp4
Chr08	74115196	74115694	Xetrov90021344m.g	bmp4
scaffold_276	81878	82195	Xetrov90027723m.g	bmp7.1
scaffold_276	109688	110242	Xetrov90027723m.g	bmp7.1
Chr03	88794470	88794879	Xetrov90008709m.g	bmp7.2
Chr06	25690583	25690904	Xetrov90015805m.g	bmper
Chr06	25632025	25632389	Xetrov90015805m.g	bmper
Chr06	25686213	25687049	Xetrov90015805m.g	bmper
Chr06	25640007	25640559	Xetrov90015805m.g	bmper
Chr07	45676382	45677052	Xetrov90018159m.g	bmpr1a
Chr07	45666681	45666929	Xetrov90018159m.g	bmpr1a
Chr01	66717088	66717535	Xetrov90001215m.g	bmpr1b
Chr01	66836365	66836647	Xetrov90001215m.g	bmpr1b
Chr01	66782181	66782479	Xetrov90001215m.g	bmpr1b
Chr01	66778615	66779226	Xetrov90001215m.g	bmpr1b
Chr01	66782773	66783188	Xetrov90001215m.g	bmpr1b
Chr01	66763608	66763970	Xetrov90001215m.g	bmpr1b
Chr01	66769596	66770254	Xetrov90001215m.g	bmpr1b
Chr01	66780569	66781184	Xetrov90001215m.g	bmpr1b
Chr01	105679076	105679345	Xetrov90002079m.g	bnc2
Chr08	115091686	115092036	Xetrov90022402m.g	bnipl
scaffold_448	4139	4567	Xetrov90028855m.g	bod1
scaffold_448	7641	8039	Xetrov90028855m.g	bod1
Chr01	17354407	17354812	Xetrov90000468m.g	bod1l1
Chr08	107501782	107502344	Xetrov90022174m.g	bola1
Chr08	107509158	107509554	Xetrov90022174m.g	bola1
Chr08	107497582	107498013	Xetrov90022174m.g	bola1
Chr08	107477606	107478067	Xetrov90022174m.g	bola1
Chr03	10111666	10112070	Xetrov90007241m.g	bpgm
scaffold_258	254147	254529	Xetrov90027579m.g	bptf
scaffold_258	255196	255657	Xetrov90027579m.g	bptf
scaffold_19	472414	472989	Xetrov90026882m.g	brd3
Chr03	122455166	122455476	Xetrov90009514m.g	brd4
Chr03	122455701	122456581	Xetrov90009514m.g	brd4
Chr03	122447912	122448197	Xetrov90009514m.g	brd4
Chr03	122448372	122448626	Xetrov90009514m.g	brd4
Chr02	82241875	82242368	Xetrov90005378m.g	bsdc1
Chr01	86565061	86565611	Xetrov90001678m.g	bsg
Chr01	86566682	86566981	Xetrov90001678m.g	bsg
Chr01	86567147	86567506	Xetrov90001678m.g	bsg
Chr04	87583552	87583915	Xetrov90011950m.g	bsnd
Chr01	83985178	83985509	Xetrov90001570m.g	btbd2
Chr05	23204898	23205280	Xetrov90013258m.g	btbd3
Chr08	80442795	80443212	Xetrov90021489m.g	btbd6
Chr08	80477673	80478141	Xetrov90021489m.g	btbd6
Chr03	46285744	46286061	Xetrov90007925m.g	btg1
Chr03	46251929	46252294	Xetrov90007925m.g	btg1
Chr03	46294232	46294589	Xetrov90007925m.g	btg1
Chr03	46242602	46242855	Xetrov90007925m.g	btg1
Chr03	46277506	46277928	Xetrov90007925m.g	btg1
Chr03	46298106	46298477	Xetrov90007925m.g	btg1
Chr02	62213512	62213798	Xetrov90005010m.g	btg2
Chr02	62218855	62219234	Xetrov90005010m.g	btg2
Chr02	62206126	62206428	Xetrov90005010m.g	btg2
Chr02	62200193	62200645	Xetrov90005010m.g	btg2
Chr07	112818729	112819063	Xetrov90019499m.g	btg5.2
Chr07	22282684	22282996	Xetrov90017712m.g	btrc
Chr07	11787072	11787332	Xetrov90017555m.g	bub3
scaffold_132	324938	325267	Xetrov90026191m.g	ccdc186
Chr07	20672373	20672763	Xetrov90017682m.g	borcs7
Chr07	51804389	51804849	Xetrov90018221m.g	fam241b
Chr07	51814365	51814736	Xetrov90018221m.g	fam241b
Chr02	168867200	168867621	Xetrov90006993m.g	emsy
Chr04	145240	145684	Xetrov90010134m.g	c11orf49
Chr04	159481	159843	Xetrov90010134m.g	c11orf49
Chr08	91151324	91151842	Xetrov90021729m.g	c15orf41
Chr08	91141209	91141686	Xetrov90021729m.g	c15orf41
Chr08	91154339	91154578	Xetrov90021729m.g	c15orf41
Chr10	18238579	18238835	Xetrov90025091m.g	c17orf67
Chr06	35941719	35942043	Xetrov90015958m.g	c18orf21
Chr06	35930905	35931246	Xetrov90015958m.g	c18orf21
Chr01	193347267	193347590	Xetrov90003812m.g	c18orf25
scaffold_73	1346299	1346711	Xetrov90030199m.g	c1galt1
Chr08	24942036	24942736	Xetrov90020369m.g	c1galt1c1
Chr05	39597332	39597727	Xetrov90013502m.g	c1orf131
Chr07	79018617	79019043	Xetrov90018694m.g	c1orf159
Chr02	56206388	56206869	Xetrov90004909m.g	c1orf216
Chr07	71431784	71432123	Xetrov90018551m.g	cfap74
Chr04	109348125	109348397	Xetrov90012370m.g	odr4
Chr06	2078689	2078987	Xetrov90015464m.g	c1orf35
Chr06	2073817	2074312	Xetrov90015464m.g	c1orf35
Chr07	68590909	68591463	Xetrov90018484m.g	c1orf50
Chr01	186203602	186204032	Xetrov90003683m.g	c1qtnf3
Chr01	186193948	186194306	Xetrov90003683m.g	c1qtnf3
Chr08	53860654	53860966	Xetrov90020872m.g	c2
Chr10	32607335	32607648	Xetrov90025409m.g	rab5if
Chr01	9468430	9468822	Xetrov90000271m.g	c20orf27
Chr02	184040	184471	Xetrov90003854m.g	gatd3a
Chr02	16439240	16439644	Xetrov90004142m.g	c21orf91
Chr02	16437589	16437958	Xetrov90004142m.g	c21orf91
Chr02	5644768	5645266	Xetrov90003968m.g	c2cd2
Chr01	86415548	86415873	Xetrov90001670m.g	c2cd4c
scaffold_2638	1925	2384	Xetrov90027617m.g	fam166c
scaffold_2638	5742	6098	Xetrov90027617m.g	fam166c
Chr03	130620045	130620563	Xetrov90009874m.g	c3
Chr05	117324520	117324968	Xetrov90014774m.g	dipk2a
Chr05	117318023	117318434	Xetrov90014774m.g	dipk2a
Chr01	54799863	54800195	Xetrov90001016m.g	abhd18
Chr01	58423941	58424343	Xetrov90001082m.g	fam241a
Chr01	58370629	58370961	Xetrov90001082m.g	fam241a
Chr01	58391899	58392430	Xetrov90001082m.g	fam241a
Chr01	54498980	54499292	Xetrov90001008m.g	c4orf33.1
Chr01	182875103	182875399	Xetrov90003623m.g	c6.2
Chr02	60811739	60812257	Xetrov90004982m.g	ilrun
Chr05	72299374	72299701	Xetrov90014035m.g	cfap206
Chr05	72291469	72291882	Xetrov90014035m.g	cfap206
Chr06	28944504	28944787	Xetrov90015848m.g	c6orf62
Chr06	28938836	28939070	Xetrov90015848m.g	c6orf62
Chr01	182955175	182955476	Xetrov90003624m.g	c7
Chr06	66039738	66040153	Xetrov90016299m.g	c7orf25
Chr06	66030216	66030526	Xetrov90016299m.g	c7orf25
Chr04	105242196	105242560	Xetrov90012275m.g	fmc1
Chr04	76109067	76109355	Xetrov90011741m.g	c8a
Chr03	107355186	107355678	Xetrov90009032m.g	tcim
Chr01	183650356	183650716	Xetrov90003636m.g	c9
Chr01	183647211	183647755	Xetrov90003636m.g	c9
Chr08	4479013	4479534	Xetrov90019835m.g	c9orf78
scaffold_192	106925	107178	Xetrov90026926m.g	card19
Chr08	7102817	7103079	Xetrov90019898m.g	spaca9
Chr03	81861862	81862274	Xetrov90008546m.g	ca12
Chr03	81853190	81853496	Xetrov90008546m.g	ca12
Chr08	111975181	111975723	Xetrov90022311m.g	ca14
Chr08	111972903	111973263	Xetrov90022311m.g	ca14
Chr08	111966420	111966754	Xetrov90022311m.g	ca14
Chr07	80624950	80625276	Xetrov90018718m.g	ca6
Chr04	69379495	69379785	Xetrov90011610m.g	ca7
Chr06	102046790	102047115	Xetrov90016839m.g	ca8
Chr04	78905618	78906216	Xetrov90011780m.g	cachd1
Chr04	78913773	78914380	Xetrov90011780m.g	cachd1
Chr04	78912399	78912791	Xetrov90011780m.g	cachd1
Chr04	78909395	78909747	Xetrov90011780m.g	cachd1
Chr04	110957605	110958052	Xetrov90012416m.g	cacna1i
Chr03	70209339	70209681	Xetrov90008325m.g	cacna2d1
Chr03	70211189	70211700	Xetrov90008325m.g	cacna2d1
Chr03	70207945	70208407	Xetrov90008325m.g	cacna2d1
Chr04	117386740	117386965	Xetrov90012594m.g	cacna2d2
scaffold_3867	212	985	Xetrov90028467m.g	cacng1
Chr01	74581601	74581844	Xetrov90001325m.g	cactin
Chr07	82875921	82876336	Xetrov90018745m.g	cadm1
Chr07	83046061	83046314	Xetrov90018745m.g	cadm1
Chr07	83090489	83090814	Xetrov90018745m.g	cadm1
Chr07	83042770	83043292	Xetrov90018745m.g	cadm1
Chr07	83200102	83200407	Xetrov90018745m.g	cadm1
Chr07	83002117	83002492	Xetrov90018745m.g	cadm1
Chr07	82980310	82980854	Xetrov90018745m.g	cadm1
Chr04	133037389	133037724	Xetrov90012895m.g	cadps
Chr04	133050063	133050415	Xetrov90012895m.g	cadps
Chr04	133132762	133133051	Xetrov90012895m.g	cadps
Chr03	60507777	60508282	Xetrov90008175m.g	cadps2
Chr03	60584254	60584608	Xetrov90008175m.g	cadps2
Chr06	111385745	111386021	Xetrov90016999m.g	calb1
Chr07	20317236	20317740	Xetrov90017670m.g	calhm2
Chr03	128900930	128901214	Xetrov90009770m.g	calr
Chr04	128013046	128013673	Xetrov90012813m.g	camk1
Chr04	128012336	128012862	Xetrov90012813m.g	camk1
Chr01	59935621	59936086	Xetrov90001113m.g	camk2d
Chr01	59987181	59987484	Xetrov90001113m.g	camk2d
Chr01	59990145	59990567	Xetrov90001113m.g	camk2d
Chr01	59933967	59934612	Xetrov90001113m.g	camk2d
Chr07	51928855	51929238	Xetrov90018229m.g	camk2g
Chr05	111135616	111135880	Xetrov90014670m.g	camk2n2
Chr02	97922636	97923149	Xetrov90005679m.g	camkk1
Chr05	14883041	14883434	Xetrov90013147m.g	camkmt
Chr05	14881558	14882166	Xetrov90013147m.g	camkmt
Chr04	116197186	116197870	Xetrov90012563m.g	camkv
Chr03	17165670	17166018	Xetrov90007343m.g	camlg
Chr06	4893284	4893712	Xetrov90015523m.g	LOC101732593
Chr03	122315699	122316069	Xetrov90009511m.g	camsap3
Chr03	122307358	122308175	Xetrov90009511m.g	camsap3
Chr03	122276366	122276823	Xetrov90009511m.g	camsap3
Chr10	11898548	11898923	Xetrov90024943m.g	cant1
Chr03	9533991	9534452	Xetrov90007228m.g	canx
Chr06	48621434	48621737	Xetrov90016104m.g	cap2
Chr04	35497440	35497778	Xetrov90010931m.g	capn1
Chr05	3229689	3230536	Xetrov90012952m.g	capn13
Chr05	5299171	5299488	Xetrov90013007m.g	capn2
Chr05	5319944	5320536	Xetrov90013008m.g	capn8.1
Chr05	5314659	5315240	Xetrov90013008m.g	capn8.1
scaffold_1358	3044	3854	Xetrov90026250m.g	capns1
Chr01	144956178	144956450	Xetrov90002969m.g	car15[provLOC779564]
Chr03	128089902	128090320	Xetrov90009727m.g	carm1
Chr03	128082617	128082931	Xetrov90009727m.g	carm1
Chr03	115906187	115906642	Xetrov90009230m.g	casc4
scaffold_113	316761	317149	Xetrov90025909m.g	cass4
scaffold_113	313346	313869	Xetrov90025909m.g	cass4
scaffold_113	320994	321559	Xetrov90025909m.g	cass4
scaffold_113	307778	308165	Xetrov90025909m.g	cass4
scaffold_113	309743	310131	Xetrov90025909m.g	cass4
scaffold_113	306478	307084	Xetrov90025909m.g	cass4
scaffold_113	322690	323065	Xetrov90025909m.g	cass4
Chr07	39344420	39344769	Xetrov90018033m.g	casz1
Chr07	39146731	39147013	Xetrov90018033m.g	casz1
Chr10	33371303	33372133	Xetrov90025432m.g	cbfa2t2
Chr10	33377247	33377541	Xetrov90025432m.g	cbfa2t2
Chr10	33360753	33361464	Xetrov90025432m.g	cbfa2t2
Chr02	99720198	99720428	Xetrov90005702m.g	cblb
Chr01	116777584	116778194	Xetrov90002240m.g	cbwd2
Chr01	116778925	116779709	Xetrov90002240m.g	cbwd2
Chr02	142436787	142437181	Xetrov90006455m.g	cbx5
Chr02	142439841	142440591	Xetrov90006455m.g	cbx5
Chr02	142455699	142456215	Xetrov90006455m.g	cbx5
Chr10	24992259	24992668	Xetrov90025234m.g	cbx8
Chr09	77648817	77649212	Xetrov90024505m.g	cfap65
Chr09	77629245	77629628	Xetrov90024505m.g	cfap65
Chr01	191960807	191961413	Xetrov90003780m.g	cfap53
Chr01	157794135	157794388	Xetrov90003228m.g	ccdc117
Chr06	5010539	5010850	Xetrov90015532m.g	ccdc12
Chr06	5015794	5016367	Xetrov90015532m.g	ccdc12
Chr01	99347223	99347975	Xetrov90001929m.g	ccdc124
Chr06	34628692	34628975	Xetrov90015941m.g	ccdc126
Chr06	69857210	69857544	Xetrov90016344m.g	ccdc127
Chr06	26762293	26762648	Xetrov90015825m.g	itprid1
Chr01	21033864	21034350	Xetrov90000527m.g	ccdc149
Chr01	21032695	21032991	Xetrov90000527m.g	ccdc149
Chr07	85880908	85881221	Xetrov90018830m.g	ccdc153
Chr05	471517	471948	Xetrov90012913m.g	ccdc167
Chr05	37734363	37734770	Xetrov90013458m.g	ccdc170
Chr08	89624623	89624954	Xetrov90021709m.g	ccdc177
Chr05	65344566	65344810	Xetrov90013934m.g	ccdc28a
Chr05	65280369	65280644	Xetrov90013934m.g	ccdc28a
Chr02	82469228	82469496	Xetrov90005397m.g	ccdc28b
Chr04	127961303	127961672	Xetrov90012812m.g	ccdc3-like.2
Chr07	78016882	78017327	Xetrov90018681m.g	LOC105945213,ccdc30
Chr05	99095836	99096239	Xetrov90014433m.g	ccdc50
Chr10	11227701	11228040	Xetrov90024935m.g	ccdc56
Chr10	11217719	11218105	Xetrov90024935m.g	ccdc56
Chr10	19554003	19554287	Xetrov90025123m.g	ccdc57
Chr01	189997768	189997988	Xetrov90003741m.g	ccdc68
Chr05	26201249	26201643	Xetrov90013312m.g	ccdc85a
Chr08	69696091	69696408	Xetrov90021283m.g	ccdc85c
Chr08	69710817	69711263	Xetrov90021283m.g	ccdc85c
Chr08	69708386	69709234	Xetrov90021283m.g	ccdc85c
Chr05	20442159	20442446	Xetrov90013218m.g	ccdc88a
Chr01	152186390	152186632	Xetrov90003080m.g	ccdc92
scaffold_1928	6788	7199	Xetrov90026935m.g	ccdc93
Chr01	20395470	20395892	Xetrov90000513m.g	ccdc96
Chr08	58093904	58094265	Xetrov90021004m.g	ccdc97
Chr06	4937345	4937777	Xetrov90015525m.g	ccm2
Chr06	4944689	4944926	Xetrov90015525m.g	ccm2
Chr02	149026924	149027361	Xetrov90006655m.g	ccna1
Chr02	149022962	149023330	Xetrov90006655m.g	ccna1
Chr01	57440456	57440833	Xetrov90001062m.g	ccna2
Chr01	57438971	57439315	Xetrov90001062m.g	ccna2
Chr01	57439551	57439810	Xetrov90001062m.g	ccna2
Chr01	57441712	57442132	Xetrov90001062m.g	ccna2
Chr08	18282293	18282969	Xetrov90020215m.g	ccnb3
Chr08	18286352	18286950	Xetrov90020215m.g	ccnb3
Chr04	6300727	6301266	Xetrov90010266m.g	ccnd1
Chr04	6321900	6322449	Xetrov90010266m.g	ccnd1
Chr04	6283028	6283452	Xetrov90010266m.g	ccnd1
Chr04	6388732	6389331	Xetrov90010266m.g	ccnd1
Chr04	6386264	6386746	Xetrov90010266m.g	ccnd1
Chr04	6392024	6392462	Xetrov90010266m.g	ccnd1
Chr04	6333572	6333881	Xetrov90010266m.g	ccnd1
Chr04	6311090	6311859	Xetrov90010266m.g	ccnd1
Chr03	2749712	2750350	Xetrov90007108m.g	ccnd2
Chr03	2916428	2916814	Xetrov90007108m.g	ccnd2
Chr10	14451997	14452348	Xetrov90025007m.g	ccndbp1
Chr06	115613218	115614824	Xetrov90017066m.g	ccne2
Chr06	115633388	115633662	Xetrov90017066m.g	ccne2
Chr06	115623760	115624047	Xetrov90017066m.g	ccne2
Chr06	115627315	115627885	Xetrov90017066m.g	ccne2
Chr03	15974900	15975173	Xetrov90007322m.g	ccng1
Chr01	94863629	94864339	Xetrov90001834m.g	ccng2
Chr01	94889450	94889860	Xetrov90001834m.g	ccng2
Chr01	169882609	169882931	Xetrov90003441m.g	ccnh
Chr01	94847825	94848185	Xetrov90001833m.g	ccni
Chr01	94848309	94848616	Xetrov90001833m.g	ccni
Chr07	17645850	17646221	Xetrov90017628m.g	ccnj
Chr07	17666731	17667241	Xetrov90017628m.g	ccnj
Chr07	17658887	17659318	Xetrov90017628m.g	ccnj
Chr07	17663158	17663385	Xetrov90017628m.g	ccnj
Chr07	17655718	17656554	Xetrov90017628m.g	ccnj
Chr07	17649807	17650348	Xetrov90017628m.g	ccnj
Chr07	17649129	17649643	Xetrov90017628m.g	ccnj
Chr05	104676453	104676755	Xetrov90014514m.g	ccnl1
Chr07	70112400	70112656	Xetrov90018528m.g	ccnl2
Chr01	178804831	178805208	Xetrov90003576m.g	ccno
Chr01	178818024	178818395	Xetrov90003576m.g	ccno
Chr09	79115352	79115835	Xetrov90024555m.g	ccnt2
Chr06	13333833	13334091	Xetrov90015623m.g	ccny
scaffold_39	1031704	1032080	Xetrov90028512m.g	ccr7
Chr01	51766005	51766395	Xetrov90000993m.g	noct
Chr01	51729509	51729929	Xetrov90000993m.g	noct
Chr01	68896758	68897086	Xetrov90001227m.g	ccser1
Chr01	68770434	68771054	Xetrov90001227m.g	ccser1
Chr01	68871668	68871984	Xetrov90001227m.g	ccser1
Chr07	50617856	50618245	Xetrov90018203m.g	ccser2
Chr04	35144918	35145424	Xetrov90010912m.g	cd151
Chr01	174267397	174267624	Xetrov90003502m.g	cd180
Chr01	174244371	174244674	Xetrov90003502m.g	cd180
Chr10	16086913	16087199	Xetrov90025045m.g	cd40
Chr02	133892551	133892810	Xetrov90006225m.g	cd63
Chr03	7872644	7872901	Xetrov90007199m.g	cd74
Chr04	3604742	3605033	Xetrov90010176m.g	cd82
Chr04	3621661	3621902	Xetrov90010176m.g	cd82
Chr05	20726395	20726689	Xetrov90013223m.g	cd93
Chr03	124112441	124112709	Xetrov90009566m.g	cd97
Chr08	36953303	36953847	Xetrov90020497m.g	cd99l2
Chr08	85595130	85595369	Xetrov90021623m.g	cdan1
Chr01	178917479	178917768	Xetrov90003579m.g	cdc20b
Chr06	5144886	5145208	Xetrov90015535m.g	cdc25a
Chr06	5118644	5118983	Xetrov90015535m.g	cdc25a
Chr01	9389588	9389988	Xetrov90000269m.g	cdc25b
Chr01	9399511	9400111	Xetrov90000269m.g	cdc25b
Chr01	9384400	9384768	Xetrov90000269m.g	cdc25b
Chr01	9378671	9379168	Xetrov90000269m.g	cdc25b
Chr01	9382057	9382756	Xetrov90000269m.g	cdc25b
Chr01	9374414	9374909	Xetrov90000269m.g	cdc25b
Chr01	9367727	9368375	Xetrov90000269m.g	cdc25b
Chr01	9367010	9367356	Xetrov90000269m.g	cdc25b
Chr01	9372194	9372690	Xetrov90000269m.g	cdc25b
Chr01	9376069	9376592	Xetrov90000269m.g	cdc25b
Chr01	9383741	9384257	Xetrov90000269m.g	cdc25b
Chr01	9377990	9378309	Xetrov90000269m.g	cdc25b
Chr05	74490182	74490615	Xetrov90014058m.g	cdc40
Chr07	68657886	68658379	Xetrov90018487m.g	cdc42
Chr08	77120537	77120787	Xetrov90021408m.g	cdc42bpb
Chr04	35564464	35565057	Xetrov90010935m.g	cdc42ep2
Chr04	35571477	35571962	Xetrov90010935m.g	cdc42ep2
Chr05	52546723	52547035	Xetrov90013710m.g	cdc42ep3
Chr10	24532927	24533305	Xetrov90025223m.g	cdc42ep4
Chr10	24521041	24521351	Xetrov90025223m.g	cdc42ep4
Chr10	24573019	24573351	Xetrov90025223m.g	cdc42ep4
Chr10	24562842	24563108	Xetrov90025223m.g	cdc42ep4
Chr01	126906592	126907024	Xetrov90002389m.g	cdc42se2l
Chr01	126894219	126894601	Xetrov90002389m.g	cdc42se2l
Chr05	144016910	144017204	Xetrov90015281m.g	cdc5l
Chr04	103669100	103669527	Xetrov90012230m.g	cdc73
Chr09	61643285	61643885	Xetrov90024255m.g	cdca7
Chr09	61674801	61675114	Xetrov90024255m.g	cdca7
Chr06	42401163	42401573	Xetrov90016030m.g	cdca7l
Chr04	63871014	63871348	Xetrov90011530m.g	cdh1
Chr04	63876715	63877100	Xetrov90011530m.g	cdh1
Chr04	63898745	63898980	Xetrov90011530m.g	cdh1
Chr04	63887648	63887939	Xetrov90011530m.g	cdh1
Chr04	59413832	59414119	Xetrov90011418m.g	cdh11
Chr04	59403370	59404002	Xetrov90011418m.g	cdh11
Chr04	59426863	59427340	Xetrov90011418m.g	cdh11
Chr04	59369878	59370362	Xetrov90011418m.g	cdh11
Chr04	59822188	59822459	Xetrov90011418m.g	cdh11
Chr04	59384759	59385048	Xetrov90011418m.g	cdh11
Chr04	59610706	59611014	Xetrov90011418m.g	cdh11
Chr06	57115329	57115674	Xetrov90016204m.g	cdh12
Chr04	65497101	65497398	Xetrov90011552m.g	cdh13
Chr06	112868317	112868678	Xetrov90017019m.g	cdh17
Chr06	58170360	58170723	Xetrov90016208m.g	cdh18
Chr06	58159825	58160095	Xetrov90016208m.g	cdh18
Chr06	96143801	96144220	Xetrov90016744m.g	cdh2
Chr06	96119519	96119807	Xetrov90016744m.g	cdh2
Chr06	96107930	96108340	Xetrov90016744m.g	cdh2
Chr06	96078140	96078480	Xetrov90016744m.g	cdh2
Chr06	96147029	96147474	Xetrov90016744m.g	cdh2
Chr06	96145737	96146232	Xetrov90016744m.g	cdh2
Chr06	96067988	96068357	Xetrov90016744m.g	cdh2
Chr06	96154246	96154752	Xetrov90016744m.g	cdh2
Chr06	96075551	96076245	Xetrov90016744m.g	cdh2
Chr06	53510534	53511024	Xetrov90016186m.g	cdh20
Chr10	16010596	16011116	Xetrov90025044m.g	cdh22
Chr10	16025079	16025685	Xetrov90025044m.g	cdh22
Chr07	93495300	93495616	Xetrov90018933m.g	megf6
Chr07	93429907	93430190	Xetrov90018933m.g	megf6
Chr07	93514157	93514436	Xetrov90018933m.g	megf6
Chr01	128068483	128068770	Xetrov90002443m.g	cdh24
Chr04	63941479	63941790	Xetrov90011532m.g	cdh3
Chr04	63940624	63940975	Xetrov90011532m.g	cdh3
Chr04	63919325	63920080	Xetrov90011532m.g	cdh3
Chr04	63920608	63921438	Xetrov90011532m.g	cdh3
Chr04	60306909	60307277	Xetrov90011422m.g	cdh5
Chr04	60140725	60141060	Xetrov90011422m.g	cdh5
Chr04	60372818	60373145	Xetrov90011422m.g	cdh5
Chr06	54355843	54356228	Xetrov90016196m.g	cdh6
Chr06	87393668	87394090	Xetrov90016605m.g	cdh7
Chr04	58497075	58497450	Xetrov90011416m.g	cdh8
Chr04	58550002	58550446	Xetrov90011416m.g	cdh8
Chr04	58550584	58550880	Xetrov90011416m.g	cdh8
Chr07	42399155	42399441	Xetrov90018086m.g	cdhr1
Chr03	38004700	38004984	Xetrov90007745m.g	cdhr2
Chr03	37955145	37955435	Xetrov90007745m.g	cdhr2
Chr07	8473332	8473615	Xetrov90017489m.g	cdk1
Chr10	3259459	3259769	Xetrov90024696m.g	cdk12
Chr06	81813191	81813500	Xetrov90016508m.g	cdk13
Chr09	47114946	47115209	Xetrov90023959m.g	cdk15
Chr09	47113650	47114198	Xetrov90023959m.g	cdk15
Chr09	47145816	47146173	Xetrov90023959m.g	cdk15
Chr02	134642080	134642548	Xetrov90006256m.g	cdk2
Chr10	6688866	6689391	Xetrov90024795m.g	cdk5r1
Chr10	17248412	17248785	Xetrov90025085m.g	cdk5rap1
Chr10	4694390	4694797	Xetrov90024748m.g	cdk5rap3
Chr08	2359178	2359809	Xetrov90019754m.g	cdk9
Chr06	29893887	29894418	Xetrov90015869m.g	cdkal1
Chr02	36977435	36978028	Xetrov90004458m.g	cdkl5
Chr02	67925258	67925695	Xetrov90005148m.g	cdkn1a
Chr01	35993514	35994022	Xetrov90000761m.g	cdkn2aip
Chr01	35996968	35997353	Xetrov90000761m.g	cdkn2aip
Chr04	85953560	85953799	Xetrov90011894m.g	cdkn2c
Chr07	109539804	109540780	Xetrov90019388m.g	cdknx
Chr07	109561592	109562111	Xetrov90019388m.g	cdknx
Chr07	109550805	109551300	Xetrov90019388m.g	cdknx
Chr07	109557626	109558335	Xetrov90019388m.g	cdknx
Chr04	60880002	60880324	Xetrov90011442m.g	cdt1
Chr06	71581839	71582222	Xetrov90016374m.g	cdv3
Chr03	7370616	7371314	Xetrov90007180m.g	cdx1
Chr03	7376048	7376484	Xetrov90007180m.g	cdx1
Chr03	7357038	7358152	Xetrov90007180m.g	cdx1
Chr03	7380067	7380795	Xetrov90007180m.g	cdx1
Chr03	7374313	7374709	Xetrov90007180m.g	cdx1
Chr02	152148605	152149114	Xetrov90006715m.g	cdx2
Chr02	152167233	152167827	Xetrov90006715m.g	cdx2
Chr02	152145213	152145550	Xetrov90006715m.g	cdx2
Chr02	152168160	152168686	Xetrov90006715m.g	cdx2
Chr02	152179834	152180327	Xetrov90006715m.g	cdx2
Chr02	152151757	152152099	Xetrov90006715m.g	cdx2
Chr02	152156058	152156614	Xetrov90006715m.g	cdx2
Chr08	25860134	25860702	Xetrov90020390m.g	cdx4
Chr08	25859033	25859477	Xetrov90020390m.g	cdx4
Chr08	25858434	25858851	Xetrov90020390m.g	cdx4
Chr08	25855532	25855840	Xetrov90020390m.g	cdx4
Chr07	101048494	101048767	Xetrov90019150m.g	ceacam19
Chr04	20626824	20627099	Xetrov90010662m.g	cebpa
Chr04	20627663	20627951	Xetrov90010662m.g	cebpa
Chr04	20623481	20623712	Xetrov90010662m.g	cebpa
Chr04	20629233	20629592	Xetrov90010662m.g	cebpa
Chr06	98184560	98185002	Xetrov90016780m.g	cebpd
Chr01	127355417	127356087	Xetrov90002411m.g	cebpe
Chr04	8027189	8027502	Xetrov90010352m.g	celf1
Chr03	73324913	73325386	Xetrov90008371m.g	celf2
Chr03	73571386	73571826	Xetrov90008371m.g	celf2
Chr03	73606329	73606709	Xetrov90008371m.g	celf2
Chr01	193911097	193911486	Xetrov90003827m.g	celf4
Chr03	64986358	64986612	Xetrov90008233m.g	celsr1
Chr03	64984124	64984670	Xetrov90008233m.g	celsr1
Chr03	65026907	65027442	Xetrov90008233m.g	celsr1
Chr03	64996023	64997029	Xetrov90008233m.g	celsr1
Chr02	76706666	76707135	Xetrov90005291m.g	celsr2
Chr02	76701290	76701689	Xetrov90005291m.g	celsr2
Chr02	76703223	76703507	Xetrov90005291m.g	celsr2
Chr02	76715925	76716252	Xetrov90005291m.g	celsr2
Chr02	76702453	76702863	Xetrov90005291m.g	celsr2
Chr01	63920039	63920322	Xetrov90001169m.g	cenpe
Chr04	87655142	87655416	Xetrov90011952m.g	cenpl
Chr02	31600036	31600620	Xetrov90004368m.g	cenpv
Chr02	31589934	31590876	Xetrov90004368m.g	cenpv
Chr01	31500365	31500693	Xetrov90000680m.g	cep135
Chr05	130032419	130032899	Xetrov90015081m.g	cep19
Chr05	130029028	130029524	Xetrov90015081m.g	cep19
Chr01	96832979	96833381	Xetrov90001883m.g	cep290
Chr03	47044348	47044687	Xetrov90007939m.g	cep83
Chr05	70638894	70639133	Xetrov90014018m.g	cep85l
Chr05	70652624	70653038	Xetrov90014018m.g	cep85l
Chr01	111978048	111978789	Xetrov90002179m.g	cer1
Chr01	111980259	111980746	Xetrov90002179m.g	cer1
Chr01	111961777	111962167	Xetrov90002179m.g	cer1
Chr08	8026141	8026421	Xetrov90019940m.g	cerk[provLOC779592]
Chr08	8026629	8026871	Xetrov90019940m.g	cerk[provLOC779592]
Chr08	8013157	8013510	Xetrov90019940m.g	cerk[provLOC779592]
Chr01	73830579	73831146	Xetrov90001297m.g	cers4
Chr01	73724510	73724924	Xetrov90001297m.g	cers4
Chr02	146059208	146059633	Xetrov90006574m.g	cers5
Chr09	64043985	64044561	Xetrov90024319m.g	cers6
Chr01	170724348	170724733	Xetrov90003449m.g	cetn3
Chr01	170673371	170673895	Xetrov90003449m.g	cetn3
Chr01	170655473	170655802	Xetrov90003449m.g	cetn3
Chr01	170743693	170743951	Xetrov90003449m.g	cetn3
Chr08	53786048	53786279	Xetrov90020868m.g	cfb
Chr08	53802999	53803485	Xetrov90020868m.g	cfb
Chr08	53790740	53791064	Xetrov90020868m.g	cfb
Chr01	81873265	81873527	Xetrov90001489m.g	cfd
Chr01	81874345	81874685	Xetrov90001489m.g	cfd
Chr04	37766703	37767186	Xetrov90011014m.g	cfl1
scaffold_273	125251	125697	Xetrov90027699m.g	cgn
scaffold_273	112164	112613	Xetrov90027699m.g	cgn
Chr01	86920284	86920593	Xetrov90001689m.g	chchd10
Chr04	122506679	122507038	Xetrov90012711m.g	chchd4
Chr06	100922447	100922820	Xetrov90016823m.g	chchd7
Chr01	173630294	173630716	Xetrov90003493m.g	chd1
Chr03	133903420	133903837	Xetrov90010033m.g	chd3
Chr06	102202763	102203301	Xetrov90016842m.g	chd7
Chr06	102278112	102279859	Xetrov90016842m.g	chd7
Chr06	102197575	102198027	Xetrov90016842m.g	chd7
Chr06	102238944	102239530	Xetrov90016842m.g	chd7
Chr06	102238246	102238712	Xetrov90016842m.g	chd7
Chr06	102263201	102263490	Xetrov90016842m.g	chd7
Chr06	102262268	102262622	Xetrov90016842m.g	chd7
Chr06	102271605	102271977	Xetrov90016842m.g	chd7
Chr01	147150587	147150846	Xetrov90003034m.g	chfr
Chr01	30767363	30767792	Xetrov90000666m.g	chic2
Chr01	30740816	30741388	Xetrov90000666m.g	chic2
Chr04	42134488	42134812	Xetrov90011190m.g	chka
Chr08	43258713	43258999	Xetrov90020572m.g	chmp1b
Chr10	33194331	33194749	Xetrov90025426m.g	chmp4b
scaffold_29	961109	961530	Xetrov90027859m.g	chmp5
Chr10	18943719	18944067	Xetrov90025105m.g	chmp6
Chr09	59297883	59298248	Xetrov90024206m.g	chn2
Chr08	95401348	95401863	Xetrov90021821m.g	chp1
Chr05	111455660	111456180	Xetrov90014683m.g	chrd.1
Chr05	111462709	111463050	Xetrov90014683m.g	chrd.1
Chr05	111437638	111438052	Xetrov90014683m.g	chrd.1
Chr05	111448424	111448975	Xetrov90014683m.g	chrd.1
Chr05	111441039	111441595	Xetrov90014683m.g	chrd.1
Chr03	85825013	85825602	Xetrov90008672m.g	chrna5
Chr02	106633702	106634001	Xetrov90005815m.g	chst10
Chr03	40590467	40590736	Xetrov90007833m.g	chst11
Chr08	94519399	94519700	Xetrov90021796m.g	chst14
Chr07	51018417	51018748	Xetrov90018215m.g	chst3
Chr07	51031278	51031781	Xetrov90018215m.g	chst3
Chr07	51022248	51022575	Xetrov90018215m.g	chst3
Chr08	50455352	50455785	Xetrov90020747m.g	chst4
Chr08	50462252	50462575	Xetrov90020747m.g	chst4
Chr04	66619181	66619488	Xetrov90011559m.g	chst6
Chr02	111325920	111326505	Xetrov90005913m.g	chst7
Chr04	20177280	20177574	Xetrov90010660m.g	chst8
Chr03	105850537	105850914	Xetrov90008994m.g	chsy1
Chr03	105861629	105861995	Xetrov90008994m.g	chsy1
Chr03	105848057	105848491	Xetrov90008994m.g	chsy1
Chr09	10537839	10538281	Xetrov90023153m.g	chtf18
Chr09	10541225	10541599	Xetrov90023153m.g	chtf18
Chr07	99653763	99654006	Xetrov90019106m.g	chuk
Chr08	87439128	87439460	Xetrov90021654m.g	churc1
Chr08	87441196	87441455	Xetrov90021654m.g	churc1
Chr06	88665503	88665935	Xetrov90016625m.g	cidea
Chr06	88663635	88664076	Xetrov90016625m.g	cidea
Chr01	81021409	81021808	Xetrov90001462m.g	cirbp
Chr01	81000628	81005215	Xetrov90001462m.g	cirbp
Chr01	81012947	81013302	Xetrov90001462m.g	cirbp
Chr01	81017365	81017641	Xetrov90001462m.g	cirbp
Chr01	81009343	81009930	Xetrov90001462m.g	cirbp
Chr02	57838834	57839555	Xetrov90004944m.g	cited4
Chr02	57840546	57840961	Xetrov90004944m.g	cited4
Chr02	57837807	57838085	Xetrov90004944m.g	cited4
Chr02	57842226	57842552	Xetrov90004944m.g	cited4
Chr02	57837019	57837652	Xetrov90004944m.g	cited4
Chr02	57856302	57856906	Xetrov90004944m.g	cited4
Chr02	57849437	57850058	Xetrov90004944m.g	cited4
Chr02	147269845	147270500	Xetrov90006615m.g	ckap2
Chr02	147265433	147265840	Xetrov90006615m.g	ckap2
Chr03	11782660	11783029	Xetrov90007264m.g	ckap4
Chr03	11740704	11741147	Xetrov90007264m.g	ckap4
Chr04	96601339	96601762	Xetrov90012110m.g	clca3
Chr01	40744430	40744890	Xetrov90000805m.g	clcn3
Chr01	40742517	40743090	Xetrov90000805m.g	clcn3
Chr05	99693035	99693277	Xetrov90014438m.g	cldn16
Chr05	99744686	99744933	Xetrov90014438m.g	cldn16
Chr02	38092537	38093449	Xetrov90004500m.g	cldn4
Chr02	38084910	38085397	Xetrov90004500m.g	cldn4
Chr09	7059722	7060067	Xetrov90022953m.g	cldn6.1
Chr09	7063674	7064126	Xetrov90022953m.g	cldn6.1
Chr09	7064531	7065936	Xetrov90022954m.g	cldn6.2
scaffold_1648	11407	12090	Xetrov90026679m.g	cldn7
scaffold_1648	5837	6191	Xetrov90026679m.g	cldn7
Chr09	31300656	31301009	Xetrov90023683m.g	clec16a
Chr08	52920465	52920875	Xetrov90020836m.g	clic1
Chr08	435466	435847	Xetrov90019675m.g	clic3
Chr03	6646976	6647548	Xetrov90007171m.g	clint1
Chr03	6650974	6651366	Xetrov90007171m.g	clint1
Chr08	59346114	59346433	Xetrov90021042m.g	clip3
Chr03	84630013	84630466	Xetrov90008619m.g	clk3
Chr08	67670809	67672225	Xetrov90021263m.g	clmn
scaffold_174	84179	84405	Xetrov90026743m.g	clpb
Chr06	102467752	102468191	Xetrov90016848m.g	clvs1
Chr02	117488946	117489240	Xetrov90006006m.g	clybl
Chr02	117493368	117493613	Xetrov90006006m.g	clybl
Chr02	117554681	117554982	Xetrov90006006m.g	clybl
Chr02	117496683	117497009	Xetrov90006006m.g	clybl
Chr02	117506739	117507269	Xetrov90006006m.g	clybl
Chr02	117485959	117486410	Xetrov90006006m.g	clybl
Chr02	117505508	117506250	Xetrov90006006m.g	clybl
Chr06	75789031	75789383	Xetrov90016434m.g	cmc1
Chr06	75739414	75739660	Xetrov90016434m.g	cmc1
Chr06	75719350	75719724	Xetrov90016434m.g	cmc1
Chr04	55412736	55413203	Xetrov90011396m.g	cmc2
Chr04	55010168	55010857	Xetrov90011385m.g	cmip
Chr04	55019940	55020236	Xetrov90011385m.g	cmip
Chr04	55044848	55045159	Xetrov90011385m.g	cmip
Chr04	83820031	83820479	Xetrov90011873m.g	cmpk1
Chr01	127540616	127541081	Xetrov90002420m.g	cmtm5
Chr01	127554442	127554809	Xetrov90002420m.g	cmtm5
Chr01	127545723	127546334	Xetrov90002420m.g	cmtm5
Chr06	74105855	74106184	Xetrov90016421m.g	cmtm8
Chr06	74111268	74111553	Xetrov90016421m.g	cmtm8
scaffold_21	1595639	1595931	Xetrov90027135m.g	cndp1
scaffold_21	1593669	1594177	Xetrov90027135m.g	cndp1
scaffold_21	1662121	1662336	Xetrov90027138m.g	cndp2
Chr01	29594616	29595138	Xetrov90000644m.g	cnga1
Chr06	110757077	110757602	Xetrov90016988m.g	cngb3
Chr08	74262211	74262848	Xetrov90021346m.g	cnih1
Chr08	74258270	74259008	Xetrov90021346m.g	cnih1
Chr08	74281143	74281562	Xetrov90021346m.g	cnih1
Chr08	74312989	74313317	Xetrov90021346m.g	cnih1
Chr05	5095097	5095428	Xetrov90013000m.g	cnih4
Chr05	42627109	42627430	Xetrov90013571m.g	cnksr3
Chr05	42631183	42631542	Xetrov90013571m.g	cnksr3
Chr01	81180561	81181011	Xetrov90001469m.g	cnn2
Chr01	81175698	81176137	Xetrov90001469m.g	cnn2
Chr01	81189643	81190099	Xetrov90001469m.g	cnn2
Chr04	91488193	91488503	Xetrov90012024m.g	cnn3
Chr04	91476863	91477618	Xetrov90012024m.g	cnn3
Chr07	26917643	26919237	Xetrov90017772m.g	cnnm1
Chr03	109038913	109039179	Xetrov90009116m.g	cnnm4
Chr01	91262974	91263729	Xetrov90001776m.g	cnot6l
Chr09	77841522	77841900	Xetrov90024511m.g	cnppd1
Chr02	134028127	134028602	Xetrov90006229m.g	cnpy2
Chr05	86725115	86725460	Xetrov90014241m.g	cnr1
Chr05	86643144	86643520	Xetrov90014241m.g	cnr1
Chr02	54823007	54823777	Xetrov90004871m.g	cnr2
Chr05	30984969	30985565	Xetrov90013378m.g	cnrip1
Chr10	11833217	11833440	Xetrov90024941m.g	cntnap1
Chr05	42148282	42148556	Xetrov90013557m.g	cog2
Chr02	130696233	130696544	Xetrov90006146m.g	cog3
Chr04	62278115	62278480	Xetrov90011493m.g	cog8
Chr05	90891211	90891567	Xetrov90014307m.g	col19a1
Chr05	90934919	90935207	Xetrov90014307m.g	col19a1
Chr04	28766782	28767097	Xetrov90010828m.g	col24a1
Chr02	140468907	140469430	Xetrov90006416m.g	col2a1
Chr02	113900684	113901092	Xetrov90005965m.g	col4a1
Chr08	29723023	29723489	Xetrov90020429m.g	col4a5
scaffold_19	1000173	1001278	Xetrov90026889m.g	col5a1
Chr09	39697550	39697910	Xetrov90023825m.g	col5a2
Chr09	39705622	39705937	Xetrov90023825m.g	col5a2
Chr04	99558606	99558966	Xetrov90012178m.g	col11a1
Chr04	99560094	99560425	Xetrov90012178m.g	col11a1
Chr02	84007511	84007748	Xetrov90005420m.g	col9a2
Chr02	83946134	83946459	Xetrov90005420m.g	col9a2
Chr05	28012541	28012883	Xetrov90013332m.g	commd1
Chr05	28036038	28036494	Xetrov90013332m.g	commd1
Chr02	123363401	123364153	Xetrov90006079m.g	commd6
Chr01	29341970	29342224	Xetrov90000640m.g	commd8
Chr04	3981960	3982235	Xetrov90010189m.g	commd9
Chr05	124940102	124940323	Xetrov90014961m.g	copb2
Chr09	9996957	9997381	Xetrov90023124m.g	cops3
Chr09	9998787	9999107	Xetrov90023124m.g	cops3
Chr06	104338409	104338830	Xetrov90016883m.g	cops5
scaffold_48	86528	86754	Xetrov90028982m.g	cops6
Chr09	48493041	48493351	Xetrov90023972m.g	cops8
Chr08	374885	375099	Xetrov90019669m.g	coq4
Chr01	143263036	143263411	Xetrov90002867m.g	coq5
Chr01	95469611	95470142	Xetrov90001848m.g	coro2a
Chr03	84284371	84284871	Xetrov90008608m.g	cox5a
Chr03	108867415	108867717	Xetrov90009110m.g	cox5b.1
Chr06	113473059	113473445	Xetrov90017038m.g	cox6c
Chr05	13187251	13187779	Xetrov90013128m.g	cox7a2l
Chr05	13105452	13105816	Xetrov90013128m.g	cox7a2l
Chr05	13176555	13176787	Xetrov90013128m.g	cox7a2l
Chr05	13096508	13096863	Xetrov90013128m.g	cox7a2l
Chr01	99905032	99905306	Xetrov90001945m.g	cpamd8
Chr01	99910219	99910574	Xetrov90001945m.g	cpamd8
Chr01	99910895	99911329	Xetrov90001945m.g	cpamd8
Chr01	42006871	42007218	Xetrov90000824m.g	cpe
Chr03	85121042	85121326	Xetrov90008640m.g	cpeb1
Chr01	17233371	17233778	Xetrov90000466m.g	cpeb2
Chr01	17200045	17200347	Xetrov90000466m.g	cpeb2
Chr01	17187377	17188041	Xetrov90000466m.g	cpeb2
Chr01	17172733	17173169	Xetrov90000466m.g	cpeb2
Chr01	17232081	17232660	Xetrov90000466m.g	cpeb2
Chr01	17206361	17206936	Xetrov90000466m.g	cpeb2
Chr01	17154920	17155187	Xetrov90000466m.g	cpeb2
Chr01	17208476	17208720	Xetrov90000466m.g	cpeb2
Chr03	49550524	49551062	Xetrov90008013m.g	cpm
Chr07	27375711	27376366	Xetrov90017784m.g	cpn1
Chr07	27401042	27401363	Xetrov90017784m.g	cpn1
Chr07	27371585	27371839	Xetrov90017784m.g	cpn1
Chr10	34237323	34237645	Xetrov90025452m.g	cpne1
Chr06	71785135	71785559	Xetrov90016378m.g	cpne4
Chr06	71905999	71906453	Xetrov90016378m.g	cpne4
Chr10	24586174	24586571	Xetrov90025224m.g	cpsf4l
Chr03	49526835	49527144	Xetrov90008010m.g	cpsf6
Chr06	31870845	31871250	Xetrov90015887m.g	cpvl
scaffold_52	480291	480960	Xetrov90029303m.g	cpz
Chr03	81371661	81372004	Xetrov90008535m.g	crabp1
Chr08	111039045	111039664	Xetrov90022288m.g	crabp2
Chr08	111035080	111035830	Xetrov90022288m.g	crabp2
Chr04	35191153	35191495	Xetrov90010913m.g	cracr2b
Chr08	54036227	54036799	Xetrov90020881m.g	crat
Chr04	101024910	101025252	Xetrov90012192m.g	crb1
Chr02	94041993	94042335	Xetrov90005623m.g	crcp
scaffold_283	203433	203917	Xetrov90027805m.g	creb3l2
scaffold_283	206431	206680	Xetrov90027805m.g	creb3l2
scaffold_283	199907	200239	Xetrov90027805m.g	creb3l2
scaffold_283	178435	178714	Xetrov90027805m.g	creb3l2
scaffold_283	180274	180668	Xetrov90027805m.g	creb3l2
scaffold_283	202016	202458	Xetrov90027805m.g	creb3l2
scaffold_283	187180	187730	Xetrov90027805m.g	creb3l2
scaffold_283	183014	183562	Xetrov90027805m.g	creb3l2
scaffold_283	208225	208667	Xetrov90027805m.g	creb3l2
scaffold_283	187981	189083	Xetrov90027805m.g	creb3l2
Chr06	32264648	32265151	Xetrov90015890m.g	creb5
Chr06	32249262	32249527	Xetrov90015890m.g	creb5
Chr03	33998764	33999031	Xetrov90007650m.g	crebrf
Chr03	33997479	33998047	Xetrov90007650m.g	crebrf
Chr02	106908575	106908854	Xetrov90005826m.g	creg2
Chr06	13393085	13393407	Xetrov90015624m.g	crem
Chr01	164935554	164935851	Xetrov90003353m.g	crhbp
Chr10	8023685	8024040	Xetrov90024844m.g	crhr1.2
Chr01	144382204	144382555	Xetrov90002926m.g	crkl
Chr05	21082343	21083012	Xetrov90013235m.g	crls1
Chr03	96891755	96892063	Xetrov90008858m.g	crtc3
Chr03	96899875	96900467	Xetrov90008858m.g	crtc3
Chr03	96897415	96898106	Xetrov90008858m.g	crtc3
Chr03	96919625	96919900	Xetrov90008858m.g	crtc3
Chr08	58428393	58428721	Xetrov90021015m.g	crx
Chr08	58437258	58438027	Xetrov90021015m.g	crx
Chr08	58427646	58428080	Xetrov90021015m.g	crx
Chr08	58439893	58440299	Xetrov90021015m.g	crx
Chr08	58438395	58438983	Xetrov90021015m.g	crx
Chr02	155868223	155868596	Xetrov90006789m.g	cryl1
Chr02	134043962	134044359	Xetrov90006230m.g	cs
Chr10	29836934	29837542	Xetrov90025307m.g	cse1l
Chr02	84093979	84094362	Xetrov90005421m.g	csmd2
Chr03	31933788	31934151	Xetrov90007626m.g	csnk1a1
Chr03	31881184	31881588	Xetrov90007626m.g	csnk1a1
Chr04	112047030	112047291	Xetrov90012444m.g	csnk1e
Chr04	27770618	27770978	Xetrov90010774m.g	csnk2a2
Chr06	5709419	5709696	Xetrov90015551m.g	csrnp1
Chr06	5695416	5695821	Xetrov90015551m.g	csrnp1
Chr06	5697021	5697482	Xetrov90015551m.g	csrnp1
Chr06	5697974	5698367	Xetrov90015551m.g	csrnp1
Chr06	5711096	5711614	Xetrov90015551m.g	csrnp1
Chr06	5710226	5710924	Xetrov90015551m.g	csrnp1
Chr06	5714916	5715237	Xetrov90015551m.g	csrnp1
Chr06	5644277	5644843	Xetrov90015551m.g	csrnp1
Chr08	69901688	69901970	Xetrov90021290m.g	mia2
Chr01	14314251	14315063	Xetrov90000404m.g	ctbp1
Chr04	29638936	29639817	Xetrov90010848m.g	ctbs
Chr09	77051479	77051817	Xetrov90024485m.g	ctdsp1
Chr02	138807002	138807366	Xetrov90006366m.g	ctdsp2
scaffold_288	35873	36223	Xetrov90027835m.g	ctf1
Chr06	118419462	118419887	Xetrov90017099m.g	cthrc1
Chr03	9615473	9615874	Xetrov90007232m.g	ctnna1
Chr06	61257834	61258271	Xetrov90016238m.g	ctnnal1
Chr06	70762995	70763260	Xetrov90016360m.g	ctnnb1
Chr06	70904095	70905357	Xetrov90016360m.g	ctnnb1
Chr06	70857164	70857408	Xetrov90016360m.g	ctnnb1
Chr06	70862326	70862708	Xetrov90016360m.g	ctnnb1
Chr06	70848395	70848811	Xetrov90016360m.g	ctnnb1
Chr06	70788185	70788628	Xetrov90016360m.g	ctnnb1
Chr06	70820334	70820860	Xetrov90016360m.g	ctnnb1
scaffold_203	181861	182180	Xetrov90027044m.g	ctr9
Chr10	16446348	16446680	Xetrov90025061m.g	ctsa
Chr10	16460621	16460934	Xetrov90025061m.g	ctsa
scaffold_13	850659	850916	Xetrov90026125m.g	ctsb
scaffold_13	845885	846186	Xetrov90026125m.g	ctsb
scaffold_13	843848	844189	Xetrov90026125m.g	ctsb
Chr04	12477944	12478244	Xetrov90010449m.g	ctsd
Chr01	123181153	123181572	Xetrov90002325m.g	ctsv
Chr02	73760796	73761095	Xetrov90005246m.g	cttnbp2nl,cttnbp2nl-like
Chr04	60731677	60732002	Xetrov90011438m.g	ctu2
Chr02	50384384	50384696	Xetrov90004744m.g	cuedc1
Chr07	33855272	33855739	Xetrov90017934m.g	cuedc2
Chr07	33911466	33911835	Xetrov90017934m.g	cuedc2
Chr07	33888847	33889167	Xetrov90017934m.g	cuedc2
Chr07	33945442	33945790	Xetrov90017934m.g	cuedc2
Chr07	33909347	33909677	Xetrov90017934m.g	cuedc2
Chr06	13508874	13509247	Xetrov90015626m.g	cul2
Chr06	13485228	13485720	Xetrov90015626m.g	cul2
Chr08	50865098	50865546	Xetrov90020772m.g	cuta
Chr02	42160137	42160454	Xetrov90004589m.g	cux1
Chr01	154826951	154827236	Xetrov90003176m.g	cux2
Chr01	175441595	175441881	Xetrov90003519m.g	cwc27
Chr02	23510533	23510753	Xetrov90004204m.g	cxadr
Chr02	23494049	23494709	Xetrov90004204m.g	cxadr
Chr07	37811699	37812124	Xetrov90018006m.g	cxcl12
Chr07	37845658	37846025	Xetrov90018006m.g	cxcl12
Chr07	37813018	37813362	Xetrov90018006m.g	cxcl12
Chr07	37849109	37850079	Xetrov90018006m.g	cxcl12
Chr07	37888676	37889004	Xetrov90018006m.g	cxcl12
Chr07	37852320	37852637	Xetrov90018006m.g	cxcl12
Chr09	76777164	76777878	Xetrov90024471m.g	cxcr4
Chr09	76769907	76770569	Xetrov90024471m.g	cxcr4
Chr09	76774709	76774964	Xetrov90024471m.g	cxcr4
Chr09	76766749	76767342	Xetrov90024471m.g	cxcr4
Chr09	76768538	76768806	Xetrov90024471m.g	cxcr4
Chr09	76776008	76776603	Xetrov90024471m.g	cxcr4
Chr09	76782171	76782548	Xetrov90024471m.g	cxcr4
Chr08	43521225	43521559	Xetrov90020581m.g	cxorf40a
Chr02	105296759	105297126	Xetrov90005799m.g	cybb
Chr02	111288191	111288432	Xetrov90005910m.g	cyfip1
Chr10	36781946	36782193	Xetrov90025600m.g	cygb
Chr07	17010790	17012108	Xetrov90017614m.g	cyp26a1
Chr07	17018702	17019084	Xetrov90017614m.g	cyp26a1
Chr07	17001386	17001699	Xetrov90017614m.g	cyp26a1
Chr07	17022223	17022626	Xetrov90017614m.g	cyp26a1
Chr07	17012421	17013158	Xetrov90017614m.g	cyp26a1
Chr07	17015162	17015802	Xetrov90017614m.g	cyp26a1
Chr07	16999970	17000346	Xetrov90017614m.g	cyp26a1
Chr09	77298142	77298476	Xetrov90024497m.g	cyp27a1[provLOC100145331]
Chr08	65236570	65237237	Xetrov90021190m.g	cyp46a1
Chr01	34839831	34840160	Xetrov90000724m.g	cyp4v2.2
Chr02	14155975	14156793	Xetrov90004127m.g	cyyr1
Chr02	14146650	14147185	Xetrov90004127m.g	cyyr1
Chr08	82856348	82856983	Xetrov90021535m.g	daam1
Chr08	82853846	82854150	Xetrov90021535m.g	daam1
Chr01	183525213	183525538	Xetrov90003634m.g	dab2
Chr01	183578667	183578989	Xetrov90003634m.g	dab2
Chr08	41595126	41595730	Xetrov90020552m.g	dach2
Chr08	41473374	41473741	Xetrov90020552m.g	dach2
Chr08	83067019	83067339	Xetrov90021540m.g	dact1
Chr08	83064768	83065177	Xetrov90021540m.g	dact1
Chr04	115321592	115322171	Xetrov90012533m.g	dag1
Chr01	138070821	138071116	Xetrov90002773m.g	dao
Chr01	74269042	74269337	Xetrov90001314m.g	dapk3
Chr09	68417472	68417891	Xetrov90024375m.g	dapl1
scaffold_21	1564725	1565242	Xetrov90027134m.g	darmin
scaffold_21	1576074	1576327	Xetrov90027134m.g	darmin
Chr09	76815573	76815902	Xetrov90024473m.g	dars1
Chr09	76832307	76832628	Xetrov90024473m.g	dars1
Chr09	76832778	76833148	Xetrov90024473m.g	dars1
Chr01	80552143	80552462	Xetrov90001454m.g	dazap1
Chr03	36460374	36460772	Xetrov90007712m.g	dbn1
Chr03	36487278	36487590	Xetrov90007712m.g	dbn1
Chr07	95637685	95638117	Xetrov90018994m.g	dbp
scaffold_84	660776	661069	Xetrov90030661m.g	dbx1
scaffold_84	651783	652220	Xetrov90030661m.g	dbx1
Chr01	127267754	127268151	Xetrov90002409m.g	dcaf11
Chr01	194643758	194644024	Xetrov90003837m.g	dcaf12
Chr10	6642623	6643015	Xetrov90024793m.g	dcakd
Chr05	69874409	69875143	Xetrov90014008m.g	dcbld1
Chr05	69880774	69881182	Xetrov90014008m.g	dcbld1
Chr01	69537750	69538186	Xetrov90001238m.g	dck.1
Chr06	69372735	69373090	Xetrov90016338m.g	dclk3
scaffold_464	1011	1490	Xetrov90028919m.g	dcp1a
Chr02	119326346	119326700	Xetrov90006041m.g	dct
Chr01	36251428	36251744	Xetrov90000765m.g	dctd
Chr09	18535831	18536458	Xetrov90023412m.g	dcun1d3
Chr09	18537579	18537906	Xetrov90023412m.g	dcun1d3
Chr06	68735969	68736399	Xetrov90016330m.g	ddc
Chr08	73821439	73821732	Xetrov90021342m.g	ddhd1
Chr08	73871171	73871523	Xetrov90021342m.g	ddhd1
Chr08	73851803	73852046	Xetrov90021342m.g	ddhd1
Chr08	73848388	73848777	Xetrov90021342m.g	ddhd1
Chr08	73816718	73816996	Xetrov90021342m.g	ddhd1
Chr07	35162564	35163082	Xetrov90017952m.g	ddit4
Chr07	35166137	35166464	Xetrov90017952m.g	ddit4
Chr07	35169073	35169489	Xetrov90017952m.g	ddit4
Chr07	35169948	35170347	Xetrov90017952m.g	ddit4
Chr01	64861632	64862008	Xetrov90001187m.g	ddit4l
scaffold_278	32937	33492	Xetrov90027754m.g	ddost
Chr02	156655969	156656243	Xetrov90006800m.g	ddx10
Chr04	110156325	110156704	Xetrov90012400m.g	ddx17
Chr02	132744004	132744505	Xetrov90006193m.g	ddx23
Chr08	6964799	6965308	Xetrov90019892m.g	ddx31[provLOC105948058]
Chr08	53680929	53681284	Xetrov90020863m.g	ddx39b
Chr01	178546676	178547005	Xetrov90003569m.g	ddx4
Chr01	178500206	178500674	Xetrov90003569m.g	ddx4
Chr01	178498753	178499245	Xetrov90003569m.g	ddx4
Chr01	178505981	178506250	Xetrov90003569m.g	ddx4
scaffold_1412	14762	15121	Xetrov90026335m.g	ddx5
Chr04	35747572	35748191	Xetrov90010938m.g	deaf1
Chr04	35742955	35743262	Xetrov90010938m.g	deaf1
Chr06	111343015	111343619	Xetrov90016998m.g	decr1
Chr09	15206222	15206519	Xetrov90023305m.g	decr2
Chr08	50246292	50246589	Xetrov90020731m.g	degs3
Chr06	48161318	48161643	Xetrov90016099m.g	dek
Chr06	48139086	48139525	Xetrov90016099m.g	dek
Chr02	67147788	67149125	Xetrov90005139m.g	dennd2c
Chr02	77779574	77779913	Xetrov90005322m.g	dennd2d
Chr06	130555058	130555513	Xetrov90017228m.g	dennd3
scaffold_299	131951	132201	Xetrov90027909m.g	dennd5a
Chr04	80379806	80380218	Xetrov90011816m.g	depdc1
Chr01	176690719	176691137	Xetrov90003537m.g	depdc1b
Chr01	176734472	176734869	Xetrov90003537m.g	depdc1b
Chr04	9351355	9352114	Xetrov90010383m.g	depdc7
Chr04	104001929	104002346	Xetrov90012249m.g	desi1
Chr06	34082629	34082920	Xetrov90015932m.g	gsdme
Chr02	169557978	169558263	Xetrov90007002m.g	dgat2
Chr08	22746640	22747044	Xetrov90020292m.g	dgat2l6
Chr05	122233091	122233408	Xetrov90014855m.g	dgkd
Chr02	51704699	51705040	Xetrov90004789m.g	dhdds
Chr07	105195851	105196141	Xetrov90019277m.g	dhdh-like.1
Chr07	105194946	105195380	Xetrov90019277m.g	dhdh-like.1
Chr03	12808175	12808508	Xetrov90007285m.g	dhfrl,dhfr
Chr02	133242926	133243252	Xetrov90006208m.g	dhh
Chr02	133253181	133253569	Xetrov90006208m.g	dhh
Chr02	133232203	133232525	Xetrov90006208m.g	dhh
Chr07	77097530	77098066	Xetrov90018658m.g	dhrs3
Chr07	77077246	77077588	Xetrov90018658m.g	dhrs3
Chr07	77083848	77084373	Xetrov90018658m.g	dhrs3
Chr07	77087612	77087913	Xetrov90018658m.g	dhrs3
Chr07	77100345	77100955	Xetrov90018658m.g	dhrs3
Chr07	77078145	77078618	Xetrov90018658m.g	dhrs3
Chr07	77093358	77094325	Xetrov90018658m.g	dhrs3
Chr02	34344848	34345483	Xetrov90004431m.g	dhrsx
Chr08	52399750	52400216	Xetrov90020811m.g	dhx16
Chr01	178783872	178784153	Xetrov90003575m.g	dhx29
Chr08	33229575	33230023	Xetrov90020469m.g	diaph2
Chr08	33220922	33221335	Xetrov90020469m.g	diaph2
Chr08	33204488	33204890	Xetrov90020469m.g	diaph2
Chr08	33206483	33206808	Xetrov90020469m.g	diaph2
Chr08	33209499	33210093	Xetrov90020469m.g	diaph2
Chr02	126759848	126760460	Xetrov90006104m.g	diaph3
Chr02	127031613	127031992	Xetrov90006104m.g	diaph3
Chr09	55917608	55918136	Xetrov90024123m.g	dip2a
Chr03	117086777	117087095	Xetrov90009286m.g	dis3l
Chr03	117105869	117106143	Xetrov90009286m.g	dis3l
Chr05	108380983	108381268	Xetrov90014590m.g	dis3l2
Chr05	5859646	5859992	Xetrov90013020m.g	disp1
Chr05	5812500	5812778	Xetrov90013020m.g	disp1
Chr05	5855966	5856386	Xetrov90013020m.g	disp1
Chr05	5860125	5860862	Xetrov90013020m.g	disp1
Chr07	74600846	74601121	Xetrov90018609m.g	dixdc1
Chr07	5563176	5563550	Xetrov90017466m.g	dkk1
Chr07	5560558	5561631	Xetrov90017466m.g	dkk1
Chr07	5633535	5634046	Xetrov90017466m.g	dkk1
Chr07	5571917	5572254	Xetrov90017466m.g	dkk1
Chr07	5565903	5566492	Xetrov90017466m.g	dkk1
Chr07	5562389	5562848	Xetrov90017466m.g	dkk1
Chr07	5642548	5642938	Xetrov90017466m.g	dkk1
Chr07	5563795	5564145	Xetrov90017466m.g	dkk1
Chr07	5623733	5624506	Xetrov90017466m.g	dkk1
Chr10	3567036	3567498	Xetrov90024708m.g	dkkx
Chr10	3562874	3563222	Xetrov90024708m.g	dkkx
Chr08	60649388	60650479	Xetrov90021085m.g	dlc
Chr08	60643357	60643696	Xetrov90021085m.g	dlc
Chr08	60657174	60657565	Xetrov90021085m.g	dlc
Chr08	60651913	60652349	Xetrov90021085m.g	dlc
Chr01	31891341	31891770	Xetrov90000693m.g	dlc1
Chr01	31854709	31855131	Xetrov90000693m.g	dlc1
Chr01	31915654	31916041	Xetrov90000693m.g	dlc1
Chr01	31856320	31856762	Xetrov90000693m.g	dlc1
Chr01	31859022	31859493	Xetrov90000693m.g	dlc1
Chr01	31848432	31848996	Xetrov90000693m.g	dlc1
Chr01	31809239	31809527	Xetrov90000693m.g	dlc1
Chr01	31841920	31842237	Xetrov90000693m.g	dlc1
Chr01	31833376	31833661	Xetrov90000693m.g	dlc1
Chr01	31857979	31858298	Xetrov90000693m.g	dlc1
Chr03	66492215	66492528	Xetrov90008255m.g	dld
Chr08	23761641	23761952	Xetrov90020330m.g	dlg3
Chr07	56455595	56456095	Xetrov90018307m.g	dlg5
Chr02	56656808	56657182	Xetrov90004923m.g	dlgap3
Chr02	56650690	56651170	Xetrov90004923m.g	dlgap3
Chr02	56679488	56679776	Xetrov90004923m.g	dlgap3
Chr05	39894979	39895429	Xetrov90013504m.g	dll1
Chr05	39907773	39908155	Xetrov90013504m.g	dll1
Chr05	39803727	39804266	Xetrov90013504m.g	dll1
Chr05	39896759	39897521	Xetrov90013504m.g	dll1
Chr05	39906933	39907541	Xetrov90013504m.g	dll1
Chr05	39900126	39900667	Xetrov90013504m.g	dll1
Chr09	62334743	62335298	Xetrov90024264m.g	dlx1
Chr09	62332865	62333199	Xetrov90024264m.g	dlx1
Chr09	62317521	62317849	Xetrov90024263m.g	dlx2
Chr10	9668492	9669250	Xetrov90024886m.g	dlx3
Chr10	9708053	9708458	Xetrov90024888m.g	dlx4
Chr10	9748407	9748726	Xetrov90024888m.g	dlx4
Chr10	9763564	9763955	Xetrov90024888m.g	dlx4
scaffold_73	1020938	1022001	Xetrov90030194m.g	dlx5
scaffold_73	1009453	1009795	Xetrov90030193m.g	dlx6
scaffold_73	1004221	1004871	Xetrov90030193m.g	dlx6
Chr04	80953441	80954035	Xetrov90011822m.g	dmbx1
Chr04	80957117	80957419	Xetrov90011822m.g	dmbx1
Chr04	80961226	80961528	Xetrov90011822m.g	dmbx1
Chr04	80963162	80963623	Xetrov90011822m.g	dmbx1
Chr02	104794069	104794631	Xetrov90005787m.g	dmd.1
Chr02	104296175	104296618	Xetrov90005784m.g	dmd.3
Chr02	104100631	104100979	Xetrov90005784m.g	dmd.3
Chr01	116482840	116483143	Xetrov90002235m.g	dmrt1
Chr01	116338583	116338931	Xetrov90002233m.g	dmrt2
Chr01	116326436	116326904	Xetrov90002233m.g	dmrt2
Chr01	109121753	109122427	Xetrov90002122m.g	dmrta1
Chr01	109098118	109098584	Xetrov90002122m.g	dmrta1
Chr01	109075033	109075445	Xetrov90002122m.g	dmrta1
Chr04	85834335	85834772	Xetrov90011892m.g	dmrta2
Chr03	119233408	119233701	Xetrov90009369m.g	dmtn
Chr03	93071830	93072131	Xetrov90008785m.g	dmxl2
Chr03	92901932	92902299	Xetrov90008785m.g	dmxl2
Chr07	96149544	96149900	Xetrov90019020m.g	dnaaf3
Chr01	152275174	152275567	Xetrov90003082m.g	dnah10
Chr06	42517483	42517701	Xetrov90016031m.g	dnah11
Chr06	42521739	42522041	Xetrov90016031m.g	dnah11
scaffold_302	4567	5856	Xetrov90027920m.g	dnah2
scaffold_302	1356	1717	Xetrov90027920m.g	dnah2
Chr08	111065242	111065742	Xetrov90022289m.g	dnaja4.2
Chr08	111063061	111063720	Xetrov90022289m.g	dnaja4.2
Chr08	111068991	111069693	Xetrov90022289m.g	dnaja4.2
Chr01	65040009	65040269	Xetrov90001192m.g	dnajb14
Chr06	9883838	9884648	Xetrov90015603m.g	dnajb6
Chr06	18763033	18763497	Xetrov90015699m.g	dnajc1
Chr06	18692950	18693225	Xetrov90015699m.g	dnajc1
Chr06	18735747	18736319	Xetrov90015699m.g	dnajc1
Chr09	57009082	57009547	Xetrov90024160m.g	dnajc10
scaffold_24	436363	436642	Xetrov90027436m.g	dnajc19
Chr04	10120148	10120502	Xetrov90010397m.g	dnajc24
Chr04	10165779	10166194	Xetrov90010397m.g	dnajc24
Chr04	10170221	10170755	Xetrov90010397m.g	dnajc24
Chr04	10173066	10173385	Xetrov90010397m.g	dnajc24
Chr04	10116667	10116905	Xetrov90010397m.g	dnajc24
Chr04	10106050	10106655	Xetrov90010397m.g	dnajc24
Chr04	10107411	10107967	Xetrov90010397m.g	dnajc24
Chr04	40288931	40289269	Xetrov90011120m.g	dnajc4
scaffold_671	28274	28667	Xetrov90029978m.g	dnajc5g
Chr04	79207782	79208123	Xetrov90011785m.g	dnajc6
Chr08	85336108	85336451	Xetrov90021613m.g	dnal1
Chr04	110243391	110243851	Xetrov90012403m.g	dnal4
Chr07	27274038	27274560	Xetrov90017783m.g	dnmbp
Chr07	27264144	27264513	Xetrov90017783m.g	dnmbp
Chr03	126653993	126654316	Xetrov90009667m.g	dnmt1
Chr07	17956395	17956931	Xetrov90017634m.g	dntt
Chr07	15881128	15881352	Xetrov90017600m.g	dock1
Chr03	56964664	56965092	Xetrov90008124m.g	dock4
Chr03	57054806	57055204	Xetrov90008124m.g	dock4
Chr03	57041750	57042080	Xetrov90008124m.g	dock4
Chr03	56966554	56966899	Xetrov90008124m.g	dock4
Chr03	56948308	56948927	Xetrov90008124m.g	dock4
Chr08	56289811	56290263	Xetrov90020945m.g	dpf1
Chr08	56281565	56281872	Xetrov90020945m.g	dpf1
Chr04	73498786	73499012	Xetrov90011704m.g	dph2
Chr02	68388680	68388972	Xetrov90005163m.g	dpt
Chr04	92112155	92112408	Xetrov90012035m.g	dpyd
Chr04	92106198	92106492	Xetrov90012035m.g	dpyd
Chr03	34173194	34173513	Xetrov90007655m.g	dpysl3
Chr07	12850253	12850945	Xetrov90017581m.g	dpysl4
Chr07	12848970	12849313	Xetrov90017581m.g	dpysl4
scaffold_482	96448	96830	Xetrov90029038m.g	drc1
Chr03	32595556	32595834	Xetrov90007634m.g	drd1
Chr03	32582795	32583009	Xetrov90007634m.g	drd1
Chr09	23373710	23374048	Xetrov90023552m.g	drg2
Chr09	23372217	23372666	Xetrov90023552m.g	drg2
Chr06	54228614	54228925	Xetrov90016194m.g	drosha
Chr06	54219059	54219371	Xetrov90016194m.g	drosha
Chr06	96589755	96590396	Xetrov90016745m.g	dsc3
Chr02	6962484	6962875	Xetrov90003994m.g	dscam
Chr02	6861859	6862219	Xetrov90003994m.g	dscam
Chr06	96721037	96721479	Xetrov90016747m.g	dsg2
Chr06	83223629	83224311	Xetrov90016546m.g	dsp
Chr06	83215300	83215844	Xetrov90016546m.g	dsp
Chr06	83222646	83222945	Xetrov90016546m.g	dsp
Chr06	83218025	83218476	Xetrov90016546m.g	dsp
Chr05	88846823	88847083	Xetrov90014281m.g	dst
Chr05	88895849	88896364	Xetrov90014281m.g	dst
Chr02	64181844	64182186	Xetrov90005063m.g	dstyk
Chr02	64142514	64142749	Xetrov90005063m.g	dstyk
Chr05	23914910	23915274	Xetrov90013277m.g	dtd1
Chr05	10946499	10946870	Xetrov90013093m.g	dtl
Chr02	90316644	90317001	Xetrov90005557m.g	dtx2
Chr03	86046401	86046811	Xetrov90008678m.g	duox1
Chr03	32239776	32240487	Xetrov90007631m.g	dusp1
Chr03	32245581	32245956	Xetrov90007631m.g	dusp1
Chr03	32224415	32224806	Xetrov90007631m.g	dusp1
Chr07	17631784	17632348	Xetrov90017627m.g	dusp11.2
Chr07	17636948	17637384	Xetrov90017627m.g	dusp11.2
Chr07	17637554	17637784	Xetrov90017627m.g	dusp11.2
Chr03	113456526	113456801	Xetrov90009207m.g	dusp26
Chr03	113466232	113466617	Xetrov90009207m.g	dusp26
Chr01	78813704	78814465	Xetrov90001405m.g	dusp4
Chr01	78871657	78871972	Xetrov90001405m.g	dusp4
Chr01	78840624	78841041	Xetrov90001405m.g	dusp4
scaffold_401	108973	109433	Xetrov90028593m.g	dusp5
scaffold_401	106337	106994	Xetrov90028593m.g	dusp5
scaffold_401	108276	108583	Xetrov90028593m.g	dusp5
scaffold_401	110880	111295	Xetrov90028593m.g	dusp5
Chr03	45505674	45506263	Xetrov90007907m.g	dusp6
Chr03	45481409	45481762	Xetrov90007907m.g	dusp6
Chr03	45486399	45486725	Xetrov90007907m.g	dusp6
Chr03	45551280	45551585	Xetrov90007907m.g	dusp6
Chr03	45499476	45499880	Xetrov90007907m.g	dusp6
Chr08	3432888	3433330	Xetrov90019784m.g	dusp9
Chr07	70034797	70035131	Xetrov90018521m.g	dvl1
Chr05	110897797	110898083	Xetrov90014656m.g	dvl3
Chr08	76490180	76490495	Xetrov90021391m.g	dync1h1
Chr09	62571606	62571944	Xetrov90024273m.g	dync1i2
Chr04	60598287	60598632	Xetrov90011429m.g	dync1li2
Chr04	60588303	60588604	Xetrov90011429m.g	dync1li2
Chr02	65713891	65714128	Xetrov90005108m.g	dyrk3
Chr02	65730347	65730842	Xetrov90005108m.g	dyrk3
Chr01	9014364	9014650	Xetrov90000265m.g	dysf,dysf-like
Chr02	118960574	118960943	Xetrov90006031m.g	dzip1
Chr02	118952925	118953429	Xetrov90006031m.g	dzip1
Chr03	52124204	52124561	Xetrov90008069m.g	e2f7
Chr03	52133744	52134070	Xetrov90008069m.g	e2f7
scaffold_299	75384	75760	Xetrov90027906m.g	e2f8
scaffold_299	81669	82134	Xetrov90027906m.g	e2f8
scaffold_299	79947	80863	Xetrov90027906m.g	e2f8
Chr09	13525715	13525997	Xetrov90023249m.g	e4f1
Chr08	87854963	87855271	Xetrov90021667m.g	eapp
Chr06	120221155	120221499	Xetrov90017125m.g	ebag9
Chr03	6874927	6875621	Xetrov90007172m.g	ebf1
Chr03	6901613	6901908	Xetrov90007172m.g	ebf1
Chr03	6857946	6858251	Xetrov90007172m.g	ebf1
Chr03	106417190	106417488	Xetrov90009004m.g	ebf2
Chr07	14047602	14047988	Xetrov90017592m.g	ebf3
Chr07	13982018	13982355	Xetrov90017592m.g	ebf3
Chr07	14013147	14013515	Xetrov90017592m.g	ebf3
Chr07	14099711	14099969	Xetrov90017592m.g	ebf3
Chr07	14036124	14036473	Xetrov90017592m.g	ebf3
Chr07	13977599	13978035	Xetrov90017592m.g	ebf3
Chr07	14077054	14077320	Xetrov90017592m.g	ebf3
Chr07	14416261	14416576	Xetrov90017592m.g	ebf3
Chr02	105634905	105635316	Xetrov90005803m.g	edar
Chr03	84586620	84586925	Xetrov90008618m.g	edc3
Chr06	85373026	85373376	Xetrov90016581m.g	edn1
Chr01	48355966	48356369	Xetrov90000928m.g	ednra
Chr01	48368396	48368845	Xetrov90000928m.g	ednra
Chr03	46558273	46558737	Xetrov90007927m.g	eea1
Chr03	46537066	46537324	Xetrov90007927m.g	eea1
Chr02	165538641	165538929	Xetrov90006939m.g	eed
Chr05	92561808	92562244	Xetrov90014326m.g	eef1a1
Chr05	92560071	92560589	Xetrov90014326m.g	eef1a1
Chr05	92567401	92567629	Xetrov90014326m.g	eef1a1
Chr05	92551064	92553012	Xetrov90014326m.g	eef1a1
Chr02	86676371	86677054	Xetrov90005480m.g	eef1a1o
Chr02	86685368	86685945	Xetrov90005480m.g	eef1a1o
Chr02	86677210	86682906	Xetrov90005480m.g	eef1a1o
Chr04	41507781	41508311	Xetrov90011162m.g	eef1g
Chr04	41525308	41525840	Xetrov90011162m.g	eef1g
Chr04	41520678	41520980	Xetrov90011162m.g	eef1g
Chr04	41514416	41514908	Xetrov90011162m.g	eef1g
Chr04	41521619	41522000	Xetrov90011162m.g	eef1g
Chr04	124705647	124705973	Xetrov90012739m.g	eefsec
Chr04	124530185	124531056	Xetrov90012739m.g	eefsec
Chr03	67463747	67464333	Xetrov90008284m.g	efcab10
Chr02	24374882	24375325	Xetrov90004227m.g	efcab5
Chr02	24381708	24381974	Xetrov90004227m.g	efcab5
Chr01	136538257	136538671	Xetrov90002751m.g	efna5
Chr01	136490628	136490992	Xetrov90002751m.g	efna5
Chr01	136519814	136520452	Xetrov90002751m.g	efna5
Chr01	136454601	136454945	Xetrov90002751m.g	efna5
Chr01	136495424	136495721	Xetrov90002751m.g	efna5
Chr01	136451912	136452334	Xetrov90002751m.g	efna5
Chr02	115096048	115096271	Xetrov90005973m.g	efnb2
Chr02	115009326	115009705	Xetrov90005973m.g	efnb2
Chr02	114965282	114966113	Xetrov90005973m.g	efnb2
Chr02	114984215	114984534	Xetrov90005973m.g	efnb2
Chr02	115237356	115237706	Xetrov90005973m.g	efnb2
Chr02	114957243	114957725	Xetrov90005973m.g	efnb2
Chr02	115086241	115086769	Xetrov90005973m.g	efnb2
Chr02	114962409	114962808	Xetrov90005973m.g	efnb2
Chr02	115145133	115145434	Xetrov90005973m.g	efnb2
Chr02	115018322	115018833	Xetrov90005973m.g	efnb2
Chr02	115084167	115084473	Xetrov90005973m.g	efnb2
Chr02	114974157	114974742	Xetrov90005973m.g	efnb2
Chr02	115041744	115042025	Xetrov90005973m.g	efnb2
Chr02	114974977	114975544	Xetrov90005973m.g	efnb2
Chr02	114977327	114977751	Xetrov90005973m.g	efnb2
Chr02	114966796	114967448	Xetrov90005973m.g	efnb2
Chr02	114983493	114983893	Xetrov90005973m.g	efnb2
Chr02	115215098	115215492	Xetrov90005973m.g	efnb2
Chr01	127537153	127537405	Xetrov90002419m.g	efs
Chr03	96184889	96185350	Xetrov90008846m.g	efl1
Chr01	59058841	59059100	Xetrov90001088m.g	egf
Chr01	184641812	184642141	Xetrov90003656m.g	egflam
Chr01	184671921	184672502	Xetrov90003656m.g	egflam
Chr01	184710523	184710896	Xetrov90003656m.g	egflam
Chr06	65410153	65410726	Xetrov90016289m.g	egfr
Chr06	65418369	65418776	Xetrov90016289m.g	egfr
Chr06	65421171	65421453	Xetrov90016289m.g	egfr
Chr06	65394168	65394441	Xetrov90016289m.g	egfr
Chr06	65409350	65410099	Xetrov90016289m.g	egfr
Chr06	65444346	65444880	Xetrov90016289m.g	egfr
Chr08	93484953	93485350	Xetrov90021762m.g	egln3
Chr08	93599499	93599894	Xetrov90021762m.g	egln3
Chr08	93459386	93459751	Xetrov90021762m.g	egln3
Chr08	93568842	93569122	Xetrov90021762m.g	egln3
Chr03	38806524	38806852	Xetrov90007781m.g	egr1
Chr07	9526542	9526832	Xetrov90017506m.g	egr2
Chr07	9491063	9491336	Xetrov90017506m.g	egr2
Chr01	10343091	10343559	Xetrov90000310m.g	egr4
Chr01	10342666	10342970	Xetrov90000310m.g	egr4
Chr04	38551090	38551470	Xetrov90011046m.g	ehd1
Chr05	115004563	115005082	Xetrov90014741m.g	eif2a
Chr08	87530284	87530601	Xetrov90021656m.g	eif2ak4
Chr04	113119728	113120035	Xetrov90012487m.g	eif3d
Chr06	116473769	116474035	Xetrov90017081m.g	eif3e
Chr06	121265099	121265432	Xetrov90017129m.g	eif3h
Chr04	9551297	9551612	Xetrov90010389m.g	eif3m
Chr05	98111448	98111783	Xetrov90014414m.g	eif4a2
Chr05	39204192	39204525	Xetrov90013494m.g	eif4a3.1
Chr04	129836075	129836356	Xetrov90012857m.g	eif4e3
Chr03	128453675	128454191	Xetrov90009749m.g	elavl3
Chr03	128447792	128448125	Xetrov90009749m.g	elavl3
Chr03	128435046	128435622	Xetrov90009749m.g	elavl3
Chr03	128468631	128469285	Xetrov90009749m.g	elavl3
Chr03	128450728	128451100	Xetrov90009749m.g	elavl3
Chr03	128437182	128437669	Xetrov90009749m.g	elavl3
Chr03	128439383	128439837	Xetrov90009749m.g	elavl3
Chr04	85625824	85626665	Xetrov90011885m.g	elavl4
Chr02	129017969	129018552	Xetrov90006115m.g	elf1
Chr01	51804368	51804665	Xetrov90000994m.g	elf2
Chr02	65006667	65006911	Xetrov90005084m.g	elk4
Chr01	172800888	172801211	Xetrov90003476m.g	ell2
Chr01	172773425	172773915	Xetrov90003476m.g	ell2
Chr01	172776241	172776487	Xetrov90003476m.g	ell2
Chr01	172785053	172785480	Xetrov90003476m.g	ell2
Chr01	172767891	172768193	Xetrov90003476m.g	ell2
Chr10	14403952	14404284	Xetrov90025003m.g	elmo2
Chr01	51091058	51091358	Xetrov90000974m.g	elmod2
Chr09	7046182	7046583	Xetrov90022951m.g	eln2
Chr05	114348371	114348721	Xetrov90014719m.g	elovl5
Chr01	59046904	59047652	Xetrov90001087m.g	elovl6
Chr01	176645605	176646254	Xetrov90003535m.g	elovl7
scaffold_63	504779	505157	Xetrov90029834m.g	elp3
Chr04	9970434	9970734	Xetrov90010395m.g	elp4
Chr04	10034573	10035194	Xetrov90010395m.g	elp4
Chr04	10026006	10026271	Xetrov90010395m.g	elp4
Chr04	10011141	10011686	Xetrov90010395m.g	elp4
Chr01	181011181	181011651	Xetrov90003603m.g	emb
Chr02	31869502	31869852	Xetrov90004381m.g	emc6
Chr01	132580221	132580612	Xetrov90002687m.g	emid1
Chr01	132581304	132581694	Xetrov90002687m.g	emid1
Chr01	132589376	132589783	Xetrov90002687m.g	emid1
Chr01	132570873	132571131	Xetrov90002687m.g	emid1
scaffold_864	29045	29405	Xetrov90030762m.g	emilin1
Chr06	92157269	92157949	Xetrov90016669m.g	emilin2
Chr06	92154100	92154658	Xetrov90016669m.g	emilin2
Chr09	31007672	31008074	Xetrov90023678m.g	emp2
Chr09	30997751	30998544	Xetrov90023678m.g	emp2
Chr01	10664995	10665383	Xetrov90000319m.g	emx1
Chr01	10704620	10705564	Xetrov90000319m.g	emx1
scaffold_548	57506	58001	Xetrov90029427m.g	emx2
Chr01	165883687	165884208	Xetrov90003374m.g	enc1
Chr01	165913241	165913545	Xetrov90003374m.g	enc1
Chr01	165952803	165953178	Xetrov90003374m.g	enc1
Chr01	165949455	165949856	Xetrov90003374m.g	enc1
Chr01	165985201	165985855	Xetrov90003374m.g	enc1
Chr01	84229348	84229711	Xetrov90001577m.g	enc1.2
Chr01	84248416	84248855	Xetrov90001577m.g	enc1.2
Chr01	88662386	88663040	Xetrov90001724m.g	enoph1
Chr01	88647578	88648150	Xetrov90001724m.g	enoph1
Chr02	129974411	129974830	Xetrov90006133m.g	enox1
Chr02	129973628	129974331	Xetrov90006133m.g	enox1
Chr06	122945849	122946129	Xetrov90017147m.g	enpp2
Chr06	122957771	122958682	Xetrov90017147m.g	enpp2
Chr06	122922062	122922430	Xetrov90017147m.g	enpp2
Chr03	107147200	107147637	Xetrov90009023m.g	entpd4
Chr03	107146669	107146999	Xetrov90009023m.g	entpd4
Chr05	49413919	49414327	Xetrov90013656m.g	entpd6
Chr06	116070174	116070444	Xetrov90017076m.g	eny2
Chr06	75901729	75902303	Xetrov90016435m.g	eomes
Chr06	75916219	75916770	Xetrov90016435m.g	eomes
Chr06	75850420	75850733	Xetrov90016435m.g	eomes
Chr06	75903438	75903696	Xetrov90016435m.g	eomes
Chr06	75817001	75817395	Xetrov90016435m.g	eomes
Chr06	75914679	75915454	Xetrov90016435m.g	eomes
Chr06	75820514	75820914	Xetrov90016435m.g	eomes
Chr06	75898013	75898377	Xetrov90016435m.g	eomes
Chr06	75906888	75907580	Xetrov90016435m.g	eomes
Chr05	15885323	15885720	Xetrov90013155m.g	epas1
Chr05	15884780	15885075	Xetrov90013155m.g	epas1
Chr01	134857471	134857989	Xetrov90002737m.g	epb41l4a
Chr09	71983991	71984259	Xetrov90024440m.g	epc2
Chr09	72000285	72000673	Xetrov90024440m.g	epc2
Chr09	72010812	72011361	Xetrov90024440m.g	epc2
Chr09	71997594	71998000	Xetrov90024440m.g	epc2
Chr09	71999507	71999807	Xetrov90024440m.g	epc2
Chr09	71981041	71981371	Xetrov90024440m.g	epc2
Chr09	71974051	71974526	Xetrov90024440m.g	epc2
Chr02	58426792	58427114	Xetrov90004955m.g	epha10
Chr02	17925032	17925312	Xetrov90004160m.g	epha3
Chr02	17919266	17919624	Xetrov90004160m.g	epha3
Chr01	89501897	89502164	Xetrov90001745m.g	epha5
Chr01	89497763	89498125	Xetrov90001745m.g	epha5
Chr01	89469538	89469803	Xetrov90001745m.g	epha5
Chr01	89487326	89487617	Xetrov90001745m.g	epha5
Chr02	16940711	16941014	Xetrov90004152m.g	epha6[provLOC108645837]
Chr05	84158869	84159254	Xetrov90014217m.g	epha7
Chr05	126990922	126991282	Xetrov90015037m.g	ephb1
Chr05	127015114	127015971	Xetrov90015037m.g	ephb1
Chr05	127022764	127023208	Xetrov90015037m.g	ephb1
Chr05	126947761	126948178	Xetrov90015037m.g	ephb1
Chr05	126963038	126963307	Xetrov90015037m.g	ephb1
Chr05	111713341	111713816	Xetrov90014689m.g	ephb3
Chr03	136970824	136971203	Xetrov90010126m.g	ephb4
Chr03	136960617	136961147	Xetrov90010126m.g	ephb4
Chr03	122424855	122425694	Xetrov90009513m.g	ephx3
Chr03	122425825	122426294	Xetrov90009513m.g	ephx3
Chr03	122423524	122423969	Xetrov90009513m.g	ephx3
Chr04	94528056	94528383	Xetrov90012076m.g	ephx4
Chr09	12620721	12621136	Xetrov90023203m.g	epn2
Chr09	12617321	12618087	Xetrov90023203m.g	epn2
Chr09	12606067	12606428	Xetrov90023203m.g	epn2
Chr09	12618149	12618753	Xetrov90023203m.g	epn2
Chr07	96568468	96568838	Xetrov90019027m.g	epn1
Chr07	96577547	96578001	Xetrov90019027m.g	epn1
scaffold_266	12787	13257	Xetrov90027628m.g	eps8
Chr04	35633810	35634068	Xetrov90010936m.g	eps8l2
Chr03	45870532	45870878	Xetrov90007917m.g	epyc
Chr10	2955474	2955748	Xetrov90024686m.g	erbb2
Chr02	134490454	134490708	Xetrov90006249m.g	erbb3
Chr02	134477255	134477522	Xetrov90006249m.g	erbb3
Chr02	134456030	134456414	Xetrov90006249m.g	erbb3
Chr07	61994105	61994371	Xetrov90018392m.g	ercc1
Chr08	49652520	49652804	Xetrov90020710m.g	ercc2
Chr02	116115588	116115994	Xetrov90005986m.g	ercc5
Chr01	123834879	123835150	Xetrov90002333m.g	ercc6l2
Chr01	123770067	123770404	Xetrov90002333m.g	ercc6l2
Chr07	99092470	99092847	Xetrov90019088m.g	erf
Chr07	99088418	99089227	Xetrov90019088m.g	erf
Chr07	99093900	99094383	Xetrov90019088m.g	erf
Chr07	99071181	99071847	Xetrov90019088m.g	erf
Chr03	2247085	2247405	Xetrov90007091m.g	ergic2
Chr04	82863979	82864412	Xetrov90011847m.g	eri3
Chr04	82930031	82930360	Xetrov90011847m.g	eri3
Chr04	82829287	82829648	Xetrov90011847m.g	eri3
Chr04	82865219	82865883	Xetrov90011847m.g	eri3
Chr04	82928325	82928703	Xetrov90011847m.g	eri3
Chr09	69018548	69019058	Xetrov90024385m.g	ermn
Chr01	114675382	114675683	Xetrov90002201m.g	ermp1
Chr05	60226150	60226592	Xetrov90013829m.g	ero1b
Chr07	64470779	64471252	Xetrov90018415m.g	esam
Chr02	131294135	131294566	Xetrov90006159m.g	esd
Chr07	90916640	90917042	Xetrov90018895m.g	espn
Chr07	90974115	90974478	Xetrov90018896m.g	espn
Chr07	91349581	91350088	Xetrov90018903m.g	hes5.5
Chr07	91351310	91351719	Xetrov90018903m.g	hes5.5
Chr06	113006075	113006508	Xetrov90017025m.g	esrp1
Chr06	113047541	113047991	Xetrov90017025m.g	esrp1
[truncated: 9,712 more rows]
